# Supplementary material for: Association of Circulating miR-145-5p and miR-let7c and Atherosclerotic Plaques in Hypertensive Patients
Source: MDPI journal article supplement (doi:10.3390/biom11121840), 2021-12-07
Supplement: s1 [file s1]

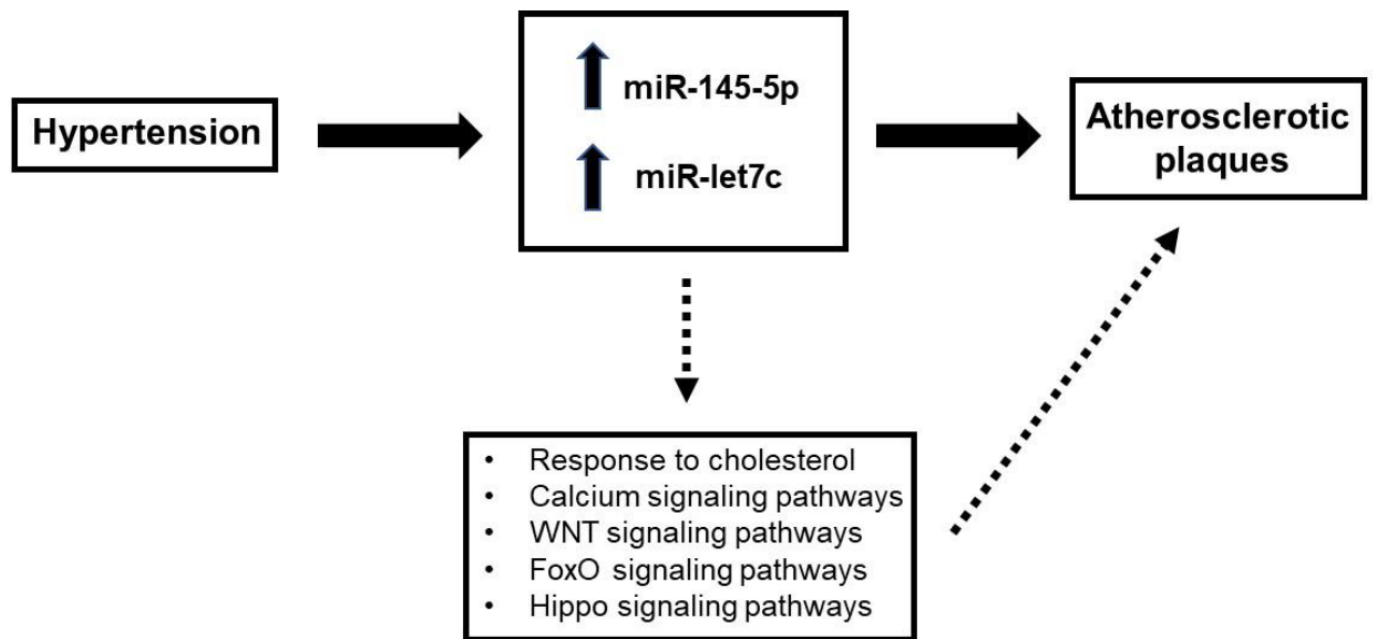

**Figure S1.** Summary of the findings.

Among hypertensive patients, elevated levels of mir-145-5p and Let-7c are associated with carotid atherosclerotic plaques. The dashed arrows indicate the potential mechanisms by which these miRNAs might modulate atherosclerosis based on gene ontology analysis.

---
