# Supplementary material for: Association of Circulating miR-145-5p and miR-let7c and Atherosclerotic Plaques in Hypertensive Patients
Source: Biomolecules. 2021 Dec 7;11(12):1840. doi: 10.3390/biom11121840 (PMC8699419; doi:10.3390/biom11121840)
Supplement: Supplementary file 1 [file biomolecules-11-01840-s001.zip › biomolecules-1490098-Table S1-A list of potential genes targeted by miR-145-5p and miR-let7c obtained using mirWalk 2.0.xlsx]

## Sheet: Planilha1
miRNA	MIMATid	Gene	EntrezID	RefseqID	miRWalk	miRanda	miRDB	RNA22	Targetscan	SUM
hsa-let-7c-5p	MIMAT0000064	ABCC2	1244	NM_000392	1	1	1	1	1	5
hsa-let-7c-5p	MIMAT0000064	ACP1	52	NM_004300	1	1	1	1	1	5
hsa-let-7c-5p	MIMAT0000064	ACP1	52	NM_007099	1	1	1	1	1	5
hsa-let-7c-5p	MIMAT0000064	ADAMTS8	11095	NM_007037	1	1	1	1	1	5
hsa-let-7c-5p	MIMAT0000064	ADRB2	154	NM_000024	1	1	1	1	1	5
hsa-let-7c-5p	MIMAT0000064	AHCTF1	25909	NM_015446	1	1	1	1	1	5
hsa-let-7c-5p	MIMAT0000064	AMACR	23600	NM_014324	1	1	1	1	1	5
hsa-let-7c-5p	MIMAT0000064	AMT	275	NM_000481	1	1	1	1	1	5
hsa-let-7c-5p	MIMAT0000064	ARHGEF38	54848	NM_001242729	1	1	1	1	1	5
hsa-let-7c-5p	MIMAT0000064	ATP6V1C1	528	NM_001695	1	1	1	1	1	5
hsa-let-7c-5p	MIMAT0000064	B3GNT7	93010	NM_145236	1	1	1	1	1	5
hsa-let-7c-5p	MIMAT0000064	C14orf28	122525	NM_001017923	1	1	1	1	1	5
hsa-let-7c-5p	MIMAT0000064	C3orf38	285237	NM_173824	1	1	1	1	1	5
hsa-let-7c-5p	MIMAT0000064	C8orf58	541565	NM_001013842	1	1	1	1	1	5
hsa-let-7c-5p	MIMAT0000064	CASP3	836	NM_004346	1	1	1	1	1	5
hsa-let-7c-5p	MIMAT0000064	CBX5	23468	NM_001127322	1	1	1	1	1	5
hsa-let-7c-5p	MIMAT0000064	CCNJ	54619	NM_001134375	1	1	1	1	1	5
hsa-let-7c-5p	MIMAT0000064	CDC34	997	NM_004359	1	1	1	1	1	5
hsa-let-7c-5p	MIMAT0000064	CLCN5	1184	NM_001127899	1	1	1	1	1	5
hsa-let-7c-5p	MIMAT0000064	COIL	8161	NM_004645	1	1	1	1	1	5
hsa-let-7c-5p	MIMAT0000064	COL14A1	7373	NM_021110	1	1	1	1	1	5
hsa-let-7c-5p	MIMAT0000064	COL1A2	1278	NM_000089	1	1	1	1	1	5
hsa-let-7c-5p	MIMAT0000064	COL3A1	1281	NM_000090	1	1	1	1	1	5
hsa-let-7c-5p	MIMAT0000064	CPA4	51200	NM_016352	1	1	1	1	1	5
hsa-let-7c-5p	MIMAT0000064	CRTAM	56253	NM_019604	1	1	1	1	1	5
hsa-let-7c-5p	MIMAT0000064	CTPS2	56474	NM_001144002	1	1	1	1	1	5
hsa-let-7c-5p	MIMAT0000064	CYP4F2	8529	NM_001082	1	1	1	1	1	5
hsa-let-7c-5p	MIMAT0000064	DDX19B	11269	NM_007242	1	1	1	1	1	5
hsa-let-7c-5p	MIMAT0000064	DMD	1756	NM_004010	1	1	1	1	1	5
hsa-let-7c-5p	MIMAT0000064	EDN1	1906	NM_001955	1	1	1	1	1	5
hsa-let-7c-5p	MIMAT0000064	EMB	133418	NM_198449	1	1	1	1	1	5
hsa-let-7c-5p	MIMAT0000064	ERCC6	2074	NM_000124	1	1	1	1	1	5
hsa-let-7c-5p	MIMAT0000064	FAM103A1	83640	NM_031452	1	1	1	1	1	5
hsa-let-7c-5p	MIMAT0000064	FAM178A	55719	NM_018121	1	1	1	1	1	5
hsa-let-7c-5p	MIMAT0000064	FGD6	55785	NM_018351	1	1	1	1	1	5
hsa-let-7c-5p	MIMAT0000064	FOXP2	93986	NM_148898	1	1	1	1	1	5
hsa-let-7c-5p	MIMAT0000064	FRMD4B	23150	NM_015123	1	1	1	1	1	5
hsa-let-7c-5p	MIMAT0000064	FZD3	7976	NM_017412	1	1	1	1	1	5
hsa-let-7c-5p	MIMAT0000064	GAN	8139	NM_022041	1	1	1	1	1	5
hsa-let-7c-5p	MIMAT0000064	GAS7	8522	NM_201433	1	1	1	1	1	5
hsa-let-7c-5p	MIMAT0000064	GATM	2628	NM_001482	1	1	1	1	1	5
hsa-let-7c-5p	MIMAT0000064	GDF6	392255	NM_001001557	1	1	1	1	1	5
hsa-let-7c-5p	MIMAT0000064	HAND1	9421	NM_004821	1	1	1	1	1	5
hsa-let-7c-5p	MIMAT0000064	HDX	139324	NM_001177479	1	1	1	1	1	5
hsa-let-7c-5p	MIMAT0000064	HMGA2	8091	NM_003483	1	1	1	1	1	5
hsa-let-7c-5p	MIMAT0000064	IGDCC3	9543	NM_004884	1	1	1	1	1	5
hsa-let-7c-5p	MIMAT0000064	IGF1R	3480	NM_000875	1	1	1	1	1	5
hsa-let-7c-5p	MIMAT0000064	IGF2BP1	10642	NM_006546	1	1	1	1	1	5
hsa-let-7c-5p	MIMAT0000064	IGF2BP2	10644	NM_006548	1	1	1	1	1	5
hsa-let-7c-5p	MIMAT0000064	IGF2BP3	10643	NM_006547	1	1	1	1	1	5
hsa-let-7c-5p	MIMAT0000064	KIAA1429	25962	NM_015496	1	1	1	1	1	5
hsa-let-7c-5p	MIMAT0000064	LIN28B	389421	NM_001004317	1	1	1	1	1	5
hsa-let-7c-5p	MIMAT0000064	LRIG3	121227	NM_153377	1	1	1	1	1	5
hsa-let-7c-5p	MIMAT0000064	MAP4K3	8491	NM_003618	1	1	1	1	1	5
hsa-let-7c-5p	MIMAT0000064	MASP1	5648	NM_001879	1	1	1	1	1	5
hsa-let-7c-5p	MIMAT0000064	MDM4	4194	NM_002393	1	1	1	1	1	5
hsa-let-7c-5p	MIMAT0000064	MFSD4	148808	NM_181644	1	1	1	1	1	5
hsa-let-7c-5p	MIMAT0000064	MRS2	57380	NM_020662	1	1	1	1	1	5
hsa-let-7c-5p	MIMAT0000064	NAP1L1	4673	NM_004537	1	1	1	1	1	5
hsa-let-7c-5p	MIMAT0000064	NPHP3	27031	NM_153240	1	1	1	1	1	5
hsa-let-7c-5p	MIMAT0000064	NRAS	4893	NM_002524	1	1	1	1	1	5
hsa-let-7c-5p	MIMAT0000064	OLFM4	10562	NM_006418	1	1	1	1	1	5
hsa-let-7c-5p	MIMAT0000064	ONECUT2	9480	NM_004852	1	1	1	1	1	5
hsa-let-7c-5p	MIMAT0000064	PARS2	25973	NM_152268	1	1	1	1	1	5
hsa-let-7c-5p	MIMAT0000064	PBX3	5090	NM_006195	1	1	1	1	1	5
hsa-let-7c-5p	MIMAT0000064	PGRMC1	10857	NM_006667	1	1	1	1	1	5
hsa-let-7c-5p	MIMAT0000064	PIGA	5277	NM_002641	1	1	1	1	1	5
hsa-let-7c-5p	MIMAT0000064	PLA2G3	50487	NM_015715	1	1	1	1	1	5
hsa-let-7c-5p	MIMAT0000064	PLEKHA8	84725	NM_001197026	1	1	1	1	1	5
hsa-let-7c-5p	MIMAT0000064	PPP1R15B	84919	NM_032833	1	1	1	1	1	5
hsa-let-7c-5p	MIMAT0000064	PRPF38B	55119	NM_018061	1	1	1	1	1	5
hsa-let-7c-5p	MIMAT0000064	PRTG	283659	NM_173814	1	1	1	1	1	5
hsa-let-7c-5p	MIMAT0000064	PTAFR	5724	NM_001164723	1	1	1	1	1	5
hsa-let-7c-5p	MIMAT0000064	RDX	5962	NM_002906	1	1	1	1	1	5
hsa-let-7c-5p	MIMAT0000064	RGPD6	729540	NM_001123363	1	1	1	1	1	5
hsa-let-7c-5p	MIMAT0000064	RPL36A	6173	NM_001199972	1	1	1	1	1	5
hsa-let-7c-5p	MIMAT0000064	RPUSD3	285367	NM_173659	1	1	1	1	1	5
hsa-let-7c-5p	MIMAT0000064	RSPO2	340419	NM_178565	1	1	1	1	1	5
hsa-let-7c-5p	MIMAT0000064	SCD	6319	NM_005063	1	1	1	1	1	5
hsa-let-7c-5p	MIMAT0000064	SIGLEC14	100049587	NM_001098612	1	1	1	1	1	5
hsa-let-7c-5p	MIMAT0000064	SLC20A1	6574	NM_005415	1	1	1	1	1	5
hsa-let-7c-5p	MIMAT0000064	SLC35D2	11046	NM_007001	1	1	1	1	1	5
hsa-let-7c-5p	MIMAT0000064	SMARCAD1	56916	NM_001128429	1	1	1	1	1	5
hsa-let-7c-5p	MIMAT0000064	SNX16	64089	NM_022133	1	1	1	1	1	5
hsa-let-7c-5p	MIMAT0000064	SOCS4	122809	NM_199421	1	1	1	1	1	5
hsa-let-7c-5p	MIMAT0000064	SPRYD7	57213	NM_020456	1	1	1	1	1	5
hsa-let-7c-5p	MIMAT0000064	SRD5A3	79644	NM_024592	1	1	1	1	1	5
hsa-let-7c-5p	MIMAT0000064	STARD9	57519	NM_020759	1	1	1	1	1	5
hsa-let-7c-5p	MIMAT0000064	SYNC	81493	NM_030786	1	1	1	1	1	5
hsa-let-7c-5p	MIMAT0000064	TGFBR1	7046	NM_004612	1	1	1	1	1	5
hsa-let-7c-5p	MIMAT0000064	TGFBR3	7049	NM_003243	1	1	1	1	1	5
hsa-let-7c-5p	MIMAT0000064	THAP9	79725	NM_024672	1	1	1	1	1	5
hsa-let-7c-5p	MIMAT0000064	THRSP	7069	NM_003251	1	1	1	1	1	5
hsa-let-7c-5p	MIMAT0000064	TMEM167A	153339	NM_174909	1	1	1	1	1	5
hsa-let-7c-5p	MIMAT0000064	TMEM2	23670	NM_013390	1	1	1	1	1	5
hsa-let-7c-5p	MIMAT0000064	TNFSF10	8743	NM_003810	1	1	1	1	1	5
hsa-let-7c-5p	MIMAT0000064	TRIM71	131405	NM_001039111	1	1	1	1	1	5
hsa-let-7c-5p	MIMAT0000064	TRMT10A	93587	NM_152292	1	1	1	1	1	5
hsa-let-7c-5p	MIMAT0000064	TTLL4	9654	NM_014640	1	1	1	1	1	5
hsa-let-7c-5p	MIMAT0000064	UHRF2	115426	NM_152896	1	1	1	1	1	5
hsa-let-7c-5p	MIMAT0000064	ZCCHC9	84240	NM_032280	1	1	1	1	1	5
hsa-let-7c-5p	MIMAT0000064	ZNF583	147949	NM_152478	1	1	1	1	1	5
hsa-miR-145-5p	MIMAT0000437	ABHD17C	58489	NM_021214	1	1	1	1	1	5
hsa-miR-145-5p	MIMAT0000437	ANGPT2	285	NM_001147	1	1	1	1	1	5
hsa-miR-145-5p	MIMAT0000437	ARL11	115761	NM_138450	1	1	1	1	1	5
hsa-miR-145-5p	MIMAT0000437	ATP1B4	23439	NM_001142447	1	1	1	1	1	5
hsa-miR-145-5p	MIMAT0000437	ATP8A1	10396	NM_006095	1	1	1	1	1	5
hsa-miR-145-5p	MIMAT0000437	BACH2	60468	NM_021813	1	1	1	1	1	5
hsa-miR-145-5p	MIMAT0000437	BAG4	9530	NM_004874	1	1	1	1	1	5
hsa-miR-145-5p	MIMAT0000437	BCAT1	586	NM_005504	1	1	1	1	1	5
hsa-miR-145-5p	MIMAT0000437	BCR	613	NM_004327	1	1	1	1	1	5
hsa-miR-145-5p	MIMAT0000437	C10orf76	79591	NM_024541	1	1	1	1	1	5
hsa-miR-145-5p	MIMAT0000437	C1QTNF7	114905	NM_001135170	1	1	1	1	1	5
hsa-miR-145-5p	MIMAT0000437	C9orf152	401546	NM_001012993	1	1	1	1	1	5
hsa-miR-145-5p	MIMAT0000437	CARF	79800	NM_024744	1	1	1	1	1	5
hsa-miR-145-5p	MIMAT0000437	CD53	963	NM_001040033	1	1	1	1	1	5
hsa-miR-145-5p	MIMAT0000437	CLCN3	1182	NM_173872	1	1	1	1	1	5
hsa-miR-145-5p	MIMAT0000437	CLCN5	1184	NM_001127899	1	1	1	1	1	5
hsa-miR-145-5p	MIMAT0000437	CLEC16A	23274	NM_015226	1	1	1	1	1	5
hsa-miR-145-5p	MIMAT0000437	COX16	51241	NM_016468	1	1	1	1	1	5
hsa-miR-145-5p	MIMAT0000437	CREG1	8804	NM_003851	1	1	1	1	1	5
hsa-miR-145-5p	MIMAT0000437	DDX54	79039	NM_001111322	1	1	1	1	1	5
hsa-miR-145-5p	MIMAT0000437	DENND5B	160518	NM_144973	1	1	1	1	1	5
hsa-miR-145-5p	MIMAT0000437	DTX4	23220	NM_015177	1	1	1	1	1	5
hsa-miR-145-5p	MIMAT0000437	DUSP6	1848	NM_001946	1	1	1	1	1	5
hsa-miR-145-5p	MIMAT0000437	EBF1	1879	NM_024007	1	1	1	1	1	5
hsa-miR-145-5p	MIMAT0000437	EIF4E3	317649	NM_001134649	1	1	1	1	1	5
hsa-miR-145-5p	MIMAT0000437	ELOVL4	6785	NM_022726	1	1	1	1	1	5
hsa-miR-145-5p	MIMAT0000437	EXOC5	10640	NM_006544	1	1	1	1	1	5
hsa-miR-145-5p	MIMAT0000437	F11R	50848	NM_016946	1	1	1	1	1	5
hsa-miR-145-5p	MIMAT0000437	FAM126A	84668	NM_032581	1	1	1	1	1	5
hsa-miR-145-5p	MIMAT0000437	FAM49A	81553	NM_030797	1	1	1	1	1	5
hsa-miR-145-5p	MIMAT0000437	FBXO9	26268	NM_033480	1	1	1	1	1	5
hsa-miR-145-5p	MIMAT0000437	FGF5	2250	NM_004464	1	1	1	1	1	5
hsa-miR-145-5p	MIMAT0000437	FLNB	2317	NM_001164317	1	1	1	1	1	5
hsa-miR-145-5p	MIMAT0000437	FN1	2335	NM_212482	1	1	1	1	1	5
hsa-miR-145-5p	MIMAT0000437	FRMD3	257019	NM_174938	1	1	1	1	1	5
hsa-miR-145-5p	MIMAT0000437	FSCN1	6624	NM_003088	1	1	1	1	1	5
hsa-miR-145-5p	MIMAT0000437	GADL1	339896	NM_207359	1	1	1	1	1	5
hsa-miR-145-5p	MIMAT0000437	GAREM	64762	NM_001242409	1	1	1	1	1	5
hsa-miR-145-5p	MIMAT0000437	GFRA1	2674	NM_005264	1	1	1	1	1	5
hsa-miR-145-5p	MIMAT0000437	GJA3	2700	NM_021954	1	1	1	1	1	5
hsa-miR-145-5p	MIMAT0000437	GPBP1	65056	NM_022913	1	1	1	1	1	5
hsa-miR-145-5p	MIMAT0000437	GPD2	2820	NM_001083112	1	1	1	1	1	5
hsa-miR-145-5p	MIMAT0000437	GPHN	10243	NM_020806	1	1	1	1	1	5
hsa-miR-145-5p	MIMAT0000437	GPI	2821	NM_001184722	1	1	1	1	1	5
hsa-miR-145-5p	MIMAT0000437	GXYLT1	283464	NM_173601	1	1	1	1	1	5
hsa-miR-145-5p	MIMAT0000437	HEPHL1	341208	NM_001098672	1	1	1	1	1	5
hsa-miR-145-5p	MIMAT0000437	HIPK2	28996	NM_022740	1	1	1	1	1	5
hsa-miR-145-5p	MIMAT0000437	IGSF5	150084	NM_001080444	1	1	1	1	1	5
hsa-miR-145-5p	MIMAT0000437	IKBKAP	8518	NM_003640	1	1	1	1	1	5
hsa-miR-145-5p	MIMAT0000437	ITPRIPL2	162073	NM_001034841	1	1	1	1	1	5
hsa-miR-145-5p	MIMAT0000437	IYD	389434	NM_001164694	1	1	1	1	1	5
hsa-miR-145-5p	MIMAT0000437	KCNMB4	27345	NM_014505	1	1	1	1	1	5
hsa-miR-145-5p	MIMAT0000437	KLF17	128209	NM_173484	1	1	1	1	1	5
hsa-miR-145-5p	MIMAT0000437	LRCH2	57631	NM_020871	1	1	1	1	1	5
hsa-miR-145-5p	MIMAT0000437	MDM2	4193	NM_002392	1	1	1	1	1	5
hsa-miR-145-5p	MIMAT0000437	MED13	9969	NM_005121	1	1	1	1	1	5
hsa-miR-145-5p	MIMAT0000437	MMAA	166785	NM_172250	1	1	1	1	1	5
hsa-miR-145-5p	MIMAT0000437	MTR	4548	NM_000254	1	1	1	1	1	5
hsa-miR-145-5p	MIMAT0000437	MYCT1	80177	NM_025107	1	1	1	1	1	5
hsa-miR-145-5p	MIMAT0000437	MYLK4	340156	NM_001012418	1	1	1	1	1	5
hsa-miR-145-5p	MIMAT0000437	MYO5A	4644	NM_000259	1	1	1	1	1	5
hsa-miR-145-5p	MIMAT0000437	NDUFB5	4711	NM_002492	1	1	1	1	1	5
hsa-miR-145-5p	MIMAT0000437	NEDD9	4739	NM_001142393	1	1	1	1	1	5
hsa-miR-145-5p	MIMAT0000437	NLN	57486	NM_020726	1	1	1	1	1	5
hsa-miR-145-5p	MIMAT0000437	NRP2	8828	NM_201266	1	1	1	1	1	5
hsa-miR-145-5p	MIMAT0000437	NUFIP2	57532	NM_020772	1	1	1	1	1	5
hsa-miR-145-5p	MIMAT0000437	NWD1	284434	NM_001007525	1	1	1	1	1	5
hsa-miR-145-5p	MIMAT0000437	ONECUT2	9480	NM_004852	1	1	1	1	1	5
hsa-miR-145-5p	MIMAT0000437	P2RY2	5029	NM_176072	1	1	1	1	1	5
hsa-miR-145-5p	MIMAT0000437	PAIP2B	400961	NM_020459	1	1	1	1	1	5
hsa-miR-145-5p	MIMAT0000437	PARP8	79668	NM_001178055	1	1	1	1	1	5
hsa-miR-145-5p	MIMAT0000437	PCBP2	5094	NM_005016	1	1	1	1	1	5
hsa-miR-145-5p	MIMAT0000437	PCSK5	5125	NM_001190482	1	1	1	1	1	5
hsa-miR-145-5p	MIMAT0000437	PLCL2	23228	NM_001144382	1	1	1	1	1	5
hsa-miR-145-5p	MIMAT0000437	PPP2R3A	5523	NM_002718	1	1	1	1	1	5
hsa-miR-145-5p	MIMAT0000437	PPP3R2	5535	NM_147180	1	1	1	1	1	5
hsa-miR-145-5p	MIMAT0000437	PRCP	5547	NM_199418	1	1	1	1	1	5
hsa-miR-145-5p	MIMAT0000437	PRDM2	7799	NM_012231	1	1	1	1	1	5
hsa-miR-145-5p	MIMAT0000437	PRLR	5618	NM_000949	1	1	1	1	1	5
hsa-miR-145-5p	MIMAT0000437	PRPF18	8559	NM_003675	1	1	1	1	1	5
hsa-miR-145-5p	MIMAT0000437	PTGFR	5737	NM_001039585	1	1	1	1	1	5
hsa-miR-145-5p	MIMAT0000437	PTGR2	145482	NM_152444	1	1	1	1	1	5
hsa-miR-145-5p	MIMAT0000437	PTP4A2	8073	NM_080391	1	1	1	1	1	5
hsa-miR-145-5p	MIMAT0000437	PVR	5817	NM_006505	1	1	1	1	1	5
hsa-miR-145-5p	MIMAT0000437	QKI	9444	NM_206855	1	1	1	1	1	5
hsa-miR-145-5p	MIMAT0000437	RAB11A	8766	NM_004663	1	1	1	1	1	5
hsa-miR-145-5p	MIMAT0000437	RAD18	56852	NM_020165	1	1	1	1	1	5
hsa-miR-145-5p	MIMAT0000437	RAD23B	5887	NM_002874	1	1	1	1	1	5
hsa-miR-145-5p	MIMAT0000437	RNF170	81790	NM_001160223	1	1	1	1	1	5
hsa-miR-145-5p	MIMAT0000437	RNF216	54476	NM_207111	1	1	1	1	1	5
hsa-miR-145-5p	MIMAT0000437	RTKN	6242	NM_033046	1	1	1	1	1	5
hsa-miR-145-5p	MIMAT0000437	SCN3B	55800	NM_018400	1	1	1	1	1	5
hsa-miR-145-5p	MIMAT0000437	SKP1	6500	NM_006930	1	1	1	1	1	5
hsa-miR-145-5p	MIMAT0000437	SLC1A2	6506	NM_004171	1	1	1	1	1	5
hsa-miR-145-5p	MIMAT0000437	SLC25A11	8402	NM_003562	1	1	1	1	1	5
hsa-miR-145-5p	MIMAT0000437	SLC25A44	9673	NM_014655	1	1	1	1	1	5
hsa-miR-145-5p	MIMAT0000437	SLC26A2	1836	NM_000112	1	1	1	1	1	5
hsa-miR-145-5p	MIMAT0000437	SLC26A7	115111	NM_052832	1	1	1	1	1	5
hsa-miR-145-5p	MIMAT0000437	SLC7A1	6541	NM_003045	1	1	1	1	1	5
hsa-miR-145-5p	MIMAT0000437	SLC7A8	23428	NM_012244	1	1	1	1	1	5
hsa-miR-145-5p	MIMAT0000437	SMAD2	4087	NM_001003652	1	1	1	1	1	5
hsa-miR-145-5p	MIMAT0000437	SMAD5	4090	NM_001001419	1	1	1	1	1	5
hsa-miR-145-5p	MIMAT0000437	SNTB2	6645	NM_006750	1	1	1	1	1	5
hsa-miR-145-5p	MIMAT0000437	SOX11	6664	NM_003108	1	1	1	1	1	5
hsa-miR-145-5p	MIMAT0000437	SPATS2	65244	NM_023071	1	1	1	1	1	5
hsa-miR-145-5p	MIMAT0000437	SPTLC2	9517	NM_004863	1	1	1	1	1	5
hsa-miR-145-5p	MIMAT0000437	SRP9	6726	NM_001130440	1	1	1	1	1	5
hsa-miR-145-5p	MIMAT0000437	SYNJ1	8867	NM_203446	1	1	1	1	1	5
hsa-miR-145-5p	MIMAT0000437	TGFBR1	7046	NM_004612	1	1	1	1	1	5
hsa-miR-145-5p	MIMAT0000437	TGFBR2	7048	NM_001024847	1	1	1	1	1	5
hsa-miR-145-5p	MIMAT0000437	TMEM196	256130	NM_152774	1	1	1	1	1	5
hsa-miR-145-5p	MIMAT0000437	TMEM206	55248	NM_001198862	1	1	1	1	1	5
hsa-miR-145-5p	MIMAT0000437	TMEM9B	56674	NM_020644	1	1	1	1	1	5
hsa-miR-145-5p	MIMAT0000437	TRIM65	201292	NM_173547	1	1	1	1	1	5
hsa-miR-145-5p	MIMAT0000437	TRMT2B	79979	NM_024917	1	1	1	1	1	5
hsa-miR-145-5p	MIMAT0000437	TTC4	7268	NM_004623	1	1	1	1	1	5
hsa-miR-145-5p	MIMAT0000437	UBA52	7311	NM_001033930	1	1	1	1	1	5
hsa-miR-145-5p	MIMAT0000437	UHMK1	127933	NM_175866	1	1	1	1	1	5
hsa-miR-145-5p	MIMAT0000437	USP31	57478	NM_020718	1	1	1	1	1	5
hsa-miR-145-5p	MIMAT0000437	WDFY3	23001	NM_014991	1	1	1	1	1	5
hsa-miR-145-5p	MIMAT0000437	WDR43	23160	NM_015131	1	1	1	1	1	5
hsa-miR-145-5p	MIMAT0000437	YTHDC1	91746	NM_001031732	1	1	1	1	1	5
hsa-miR-145-5p	MIMAT0000437	ZBTB10	65986	NM_001105539	1	1	1	1	1	5
hsa-miR-145-5p	MIMAT0000437	ZFAND5	7763	NM_001102420	1	1	1	1	1	5
hsa-miR-145-5p	MIMAT0000437	ZFYVE9	9372	NM_004799	1	1	1	1	1	5
hsa-miR-145-5p	MIMAT0000437	ZNF695	57116	NM_020394	1	1	1	1	1	5
hsa-miR-145-5p	MIMAT0000437	ZNF708	7562	NM_021269	1	1	1	1	1	5
hsa-let-7c-5p	MIMAT0000064	A1CF	29974	NM_001198819	1	1	1	0	1	4
hsa-let-7c-5p	MIMAT0000064	A1CF	29974	NM_014576	1	1	1	0	1	4
hsa-let-7c-5p	MIMAT0000064	A1CF	29974	NM_138932	1	1	1	0	1	4
hsa-let-7c-5p	MIMAT0000064	A1CF	29974	NM_001198818	1	1	1	0	1	4
hsa-let-7c-5p	MIMAT0000064	A1CF	29974	NM_138933	1	1	1	0	1	4
hsa-let-7c-5p	MIMAT0000064	A1CF	29974	NM_001198820	1	1	1	0	1	4
hsa-let-7c-5p	MIMAT0000064	ABCB9	23457	NM_019625	1	1	0	1	1	4
hsa-let-7c-5p	MIMAT0000064	ABCC5	10057	XM_005247059	1	1	0	1	1	4
hsa-let-7c-5p	MIMAT0000064	ABCC5	10057	NM_005688	1	1	1	0	1	4
hsa-let-7c-5p	MIMAT0000064	ABHD2	11057	NM_007011	1	1	0	1	1	4
hsa-let-7c-5p	MIMAT0000064	ABL2	27	NM_007314	1	1	0	1	1	4
hsa-let-7c-5p	MIMAT0000064	ABT1	29777	NM_013375	1	1	0	1	1	4
hsa-let-7c-5p	MIMAT0000064	ACPP	55	NM_001099	1	1	0	1	1	4
hsa-let-7c-5p	MIMAT0000064	ACSL6	23305	XM_005271939	1	1	0	1	1	4
hsa-let-7c-5p	MIMAT0000064	ACVR1C	130399	NM_145259	1	1	1	0	1	4
hsa-let-7c-5p	MIMAT0000064	ACVR1C	130399	NM_001111033	1	1	1	0	1	4
hsa-let-7c-5p	MIMAT0000064	ACVR1C	130399	NM_001111032	1	1	1	0	1	4
hsa-let-7c-5p	MIMAT0000064	ACVR1C	130399	NM_001111031	1	1	1	0	1	4
hsa-let-7c-5p	MIMAT0000064	ACVRL1	94	XM_005269235	1	1	0	1	1	4
hsa-let-7c-5p	MIMAT0000064	ADAMTS12	81792	XM_005248381	1	1	0	1	1	4
hsa-let-7c-5p	MIMAT0000064	ADAMTS14	140766	NM_139155	1	1	0	1	1	4
hsa-let-7c-5p	MIMAT0000064	ADAMTS15	170689	NM_139055	1	1	0	1	1	4
hsa-let-7c-5p	MIMAT0000064	ADRB1	153	NM_000684	1	1	0	1	1	4
hsa-let-7c-5p	MIMAT0000064	ADRB3	155	NM_000025	1	1	0	1	1	4
hsa-let-7c-5p	MIMAT0000064	AEN	64782	XM_005254967	1	1	0	1	1	4
hsa-let-7c-5p	MIMAT0000064	AGPAT6	137964	XM_005273402	1	1	0	1	1	4
hsa-let-7c-5p	MIMAT0000064	AIFM1	9131	NM_001130847	1	1	0	1	1	4
hsa-let-7c-5p	MIMAT0000064	AKT2	208	NM_001626	1	1	0	1	1	4
hsa-let-7c-5p	MIMAT0000064	ALDH1L2	160428	NM_001034173	1	1	0	1	1	4
hsa-let-7c-5p	MIMAT0000064	AMACR	23600	NM_001167595	1	1	1	0	1	4
hsa-let-7c-5p	MIMAT0000064	AMACR	23600	NM_203382	1	1	1	0	1	4
hsa-let-7c-5p	MIMAT0000064	AMER3	205147	NM_152698	1	1	0	1	1	4
hsa-let-7c-5p	MIMAT0000064	AMMECR1L	83607	XM_005263808	1	1	0	1	1	4
hsa-let-7c-5p	MIMAT0000064	AMOT	154796	XM_005262087	1	1	0	1	1	4
hsa-let-7c-5p	MIMAT0000064	AMT	275	NM_001164712	1	1	1	0	1	4
hsa-let-7c-5p	MIMAT0000064	AMT	275	NM_001164711	1	1	1	0	1	4
hsa-let-7c-5p	MIMAT0000064	AMT	275	NM_001164710	1	1	1	0	1	4
hsa-let-7c-5p	MIMAT0000064	ANKFY1	51479	NM_001257999	1	1	0	1	1	4
hsa-let-7c-5p	MIMAT0000064	ANKRD28	23243	NM_001195098	1	1	0	1	1	4
hsa-let-7c-5p	MIMAT0000064	ANKRD49	54851	NM_017704	1	1	0	1	1	4
hsa-let-7c-5p	MIMAT0000064	ANKRD52	283373	NM_173595	1	1	0	1	1	4
hsa-let-7c-5p	MIMAT0000064	APBB3	10307	NM_006051	1	1	0	1	1	4
hsa-let-7c-5p	MIMAT0000064	APC2	10297	NM_005883	1	1	0	1	1	4
hsa-let-7c-5p	MIMAT0000064	ARG2	384	NM_001172	1	1	0	1	1	4
hsa-let-7c-5p	MIMAT0000064	ARHGAP26	23092	XM_005268398	1	1	0	1	1	4
hsa-let-7c-5p	MIMAT0000064	ARHGAP28	79822	XM_005258144	1	1	0	1	1	4
hsa-let-7c-5p	MIMAT0000064	ARHGEF15	22899	NM_173728	1	1	0	1	1	4
hsa-let-7c-5p	MIMAT0000064	ARNT2	9915	XM_005254811	1	1	0	1	1	4
hsa-let-7c-5p	MIMAT0000064	ARPP19	10776	XM_005254132	1	1	0	1	1	4
hsa-let-7c-5p	MIMAT0000064	ATAD2B	54454	XM_005264372	1	1	0	1	1	4
hsa-let-7c-5p	MIMAT0000064	ATF7	11016	XM_005268586	1	1	0	1	1	4
hsa-let-7c-5p	MIMAT0000064	ATG10	83734	NM_031482	1	1	1	0	1	4
hsa-let-7c-5p	MIMAT0000064	ATG10	83734	NM_001131028	1	1	1	0	1	4
hsa-let-7c-5p	MIMAT0000064	ATG12	9140	NM_004707	1	1	0	1	1	4
hsa-let-7c-5p	MIMAT0000064	ATG4B	23192	XM_005246992	1	1	0	1	1	4
hsa-let-7c-5p	MIMAT0000064	ATP2A2	488	NM_170665	1	1	0	1	1	4
hsa-let-7c-5p	MIMAT0000064	ATP8B4	79895	NM_024837	1	1	0	1	1	4
hsa-let-7c-5p	MIMAT0000064	AURKA	6790	NM_198433	1	1	0	1	1	4
hsa-let-7c-5p	MIMAT0000064	BACE2	25825	NM_012105	0	1	1	1	1	4
hsa-let-7c-5p	MIMAT0000064	BACH1	571	XM_005261014	1	1	0	1	1	4
hsa-let-7c-5p	MIMAT0000064	BBX	56987	NM_001142568	1	1	0	1	1	4
hsa-let-7c-5p	MIMAT0000064	BCAP29	55973	NM_018844	1	1	0	1	1	4
hsa-let-7c-5p	MIMAT0000064	BCAT1	586	NM_005504	1	1	0	1	1	4
hsa-let-7c-5p	MIMAT0000064	BCL2L1	598	NM_138578	1	1	0	1	1	4
hsa-let-7c-5p	MIMAT0000064	BEGAIN	57596	NM_001159531	1	1	0	1	1	4
hsa-let-7c-5p	MIMAT0000064	BEND4	389206	NM_207406	1	1	0	1	1	4
hsa-let-7c-5p	MIMAT0000064	BIN3	55909	NM_018688	0	1	1	1	1	4
hsa-let-7c-5p	MIMAT0000064	BLOC1S1	2647	NM_001487	1	1	0	1	1	4
hsa-let-7c-5p	MIMAT0000064	BSDC1	55108	XM_005270985	1	1	0	1	1	4
hsa-let-7c-5p	MIMAT0000064	BTN2A1	11120	NM_078476	1	1	0	1	1	4
hsa-let-7c-5p	MIMAT0000064	C11orf57	55216	NM_018195	1	1	0	1	1	4
hsa-let-7c-5p	MIMAT0000064	C12orf49	79794	XM_005253937	1	1	0	1	1	4
hsa-let-7c-5p	MIMAT0000064	C12orf49	79794	NM_024738	1	1	1	0	1	4
hsa-let-7c-5p	MIMAT0000064	C15orf39	56905	XM_005254552	1	1	0	1	1	4
hsa-let-7c-5p	MIMAT0000064	C17orf102	400591	NM_207454	1	1	0	1	1	4
hsa-let-7c-5p	MIMAT0000064	C18orf21	83608	NM_001201475	1	1	0	1	1	4
hsa-let-7c-5p	MIMAT0000064	C19orf54	284325	XM_005258776	1	1	0	1	1	4
hsa-let-7c-5p	MIMAT0000064	C1GALT1	56913	XM_005249812	1	1	0	1	1	4
hsa-let-7c-5p	MIMAT0000064	C1orf116	79098	NM_023938	1	1	0	1	1	4
hsa-let-7c-5p	MIMAT0000064	C2	717	NM_000063	1	1	0	1	1	4
hsa-let-7c-5p	MIMAT0000064	C20orf112	140688	XM_005260283	1	1	0	1	1	4
hsa-let-7c-5p	MIMAT0000064	C5orf51	285636	NM_175921	1	1	0	1	1	4
hsa-let-7c-5p	MIMAT0000064	C8orf58	541565	NM_001198827	1	1	1	0	1	4
hsa-let-7c-5p	MIMAT0000064	C8orf58	541565	NM_173686	1	1	1	0	1	4
hsa-let-7c-5p	MIMAT0000064	C9orf40	55071	NM_017998	1	1	0	1	1	4
hsa-let-7c-5p	MIMAT0000064	CABP7	164633	NM_182527	1	1	0	1	1	4
hsa-let-7c-5p	MIMAT0000064	CACNB4	785	NM_001005747	1	1	0	1	1	4
hsa-let-7c-5p	MIMAT0000064	CANT1	124583	XM_005257020	1	1	0	1	1	4
hsa-let-7c-5p	MIMAT0000064	CASK	8573	XM_005272685	1	1	0	1	1	4
hsa-let-7c-5p	MIMAT0000064	CASP3	836	NM_032991	1	1	1	0	1	4
hsa-let-7c-5p	MIMAT0000064	CBL	867	NM_005188	1	1	0	1	1	4
hsa-let-7c-5p	MIMAT0000064	CBX2	84733	NM_005189	1	1	0	1	1	4
hsa-let-7c-5p	MIMAT0000064	CBX5	23468	NM_001127321	1	1	1	0	1	4
hsa-let-7c-5p	MIMAT0000064	CBX5	23468	NM_012117	1	1	1	0	1	4
hsa-let-7c-5p	MIMAT0000064	CCDC113	29070	NM_014157	1	1	0	1	1	4
hsa-let-7c-5p	MIMAT0000064	CCDC134	79879	XM_005261749	1	1	0	1	1	4
hsa-let-7c-5p	MIMAT0000064	CCDC71L	168455	NM_175884	1	1	0	1	1	4
hsa-let-7c-5p	MIMAT0000064	CCDC93	54520	NM_019044	1	1	0	1	1	4
hsa-let-7c-5p	MIMAT0000064	CCL16	6360	XM_005258020	1	1	0	1	1	4
hsa-let-7c-5p	MIMAT0000064	CCL22	6367	NM_002990	1	1	0	1	1	4
hsa-let-7c-5p	MIMAT0000064	CCL7	6354	NM_006273	1	1	0	1	1	4
hsa-let-7c-5p	MIMAT0000064	CCNF	899	NM_001761	1	1	0	1	1	4
hsa-let-7c-5p	MIMAT0000064	CCNG2	901	NM_004354	1	1	0	1	1	4
hsa-let-7c-5p	MIMAT0000064	CCNJ	54619	NM_001134376	1	1	1	0	1	4
hsa-let-7c-5p	MIMAT0000064	CCNJ	54619	NM_019084	1	1	1	0	1	4
hsa-let-7c-5p	MIMAT0000064	CCR7	1236	NM_001838	1	1	0	1	1	4
hsa-let-7c-5p	MIMAT0000064	CD200R1	131450	NM_138806	1	1	1	0	1	4
hsa-let-7c-5p	MIMAT0000064	CD200R1	131450	NM_170780	1	1	1	0	1	4
hsa-let-7c-5p	MIMAT0000064	CD59	966	NM_001127223	1	1	1	0	1	4
hsa-let-7c-5p	MIMAT0000064	CD59	966	NM_001127227	1	1	1	0	1	4
hsa-let-7c-5p	MIMAT0000064	CD59	966	NM_001127226	1	1	1	0	1	4
hsa-let-7c-5p	MIMAT0000064	CD59	966	NM_000611	1	1	1	0	1	4
hsa-let-7c-5p	MIMAT0000064	CD59	966	NM_203331	1	1	1	0	1	4
hsa-let-7c-5p	MIMAT0000064	CD59	966	NM_001127225	1	1	1	0	1	4
hsa-let-7c-5p	MIMAT0000064	CD59	966	NM_203329	1	1	1	0	1	4
hsa-let-7c-5p	MIMAT0000064	CD59	966	NM_203330	1	1	1	0	1	4
hsa-let-7c-5p	MIMAT0000064	CD80	941	NM_005191	1	1	0	1	1	4
hsa-let-7c-5p	MIMAT0000064	CDC42SE1	56882	NM_001038707	1	1	0	1	1	4
hsa-let-7c-5p	MIMAT0000064	CDC5L	988	NM_001253	1	1	0	1	1	4
hsa-let-7c-5p	MIMAT0000064	CDH1	999	NM_004360	1	1	0	1	1	4
hsa-let-7c-5p	MIMAT0000064	CDH22	64405	NM_021248	0	1	1	1	1	4
hsa-let-7c-5p	MIMAT0000064	CDHR1	92211	NM_033100	1	1	0	1	1	4
hsa-let-7c-5p	MIMAT0000064	CDK14	5218	XM_005250439	1	1	0	1	1	4
hsa-let-7c-5p	MIMAT0000064	CDKAL1	54901	XM_005249201	1	1	0	1	1	4
hsa-let-7c-5p	MIMAT0000064	CDKN1A	1026	NM_001220778	1	1	0	1	1	4
hsa-let-7c-5p	MIMAT0000064	CDV3	55573	NM_001134422	1	1	0	1	1	4
hsa-let-7c-5p	MIMAT0000064	CELF3	11189	NM_007185	1	1	1	0	1	4
hsa-let-7c-5p	MIMAT0000064	CELF3	11189	NM_001172649	1	1	1	0	1	4
hsa-let-7c-5p	MIMAT0000064	CELF3	11189	NM_001172648	1	1	1	0	1	4
hsa-let-7c-5p	MIMAT0000064	CEP63	80254	NM_025180	1	1	0	1	1	4
hsa-let-7c-5p	MIMAT0000064	CFLAR	8837	NM_001202519	1	1	0	1	1	4
hsa-let-7c-5p	MIMAT0000064	CHD3	1107	XM_005256427	1	1	0	1	1	4
hsa-let-7c-5p	MIMAT0000064	CHEK1	1111	NM_001114122	1	1	0	1	1	4
hsa-let-7c-5p	MIMAT0000064	CHST3	9469	NM_004273	1	1	0	1	1	4
hsa-let-7c-5p	MIMAT0000064	CHUK	1147	NM_001278	0	1	1	1	1	4
hsa-let-7c-5p	MIMAT0000064	CLCN5	1184	NM_000084	1	1	1	0	1	4
hsa-let-7c-5p	MIMAT0000064	CLCN5	1184	NM_001127898	1	1	1	0	1	4
hsa-let-7c-5p	MIMAT0000064	CLDN12	9069	NM_001185072	1	1	0	1	1	4
hsa-let-7c-5p	MIMAT0000064	CLDN16	10686	NM_006580	1	1	0	1	1	4
hsa-let-7c-5p	MIMAT0000064	CLOCK	9575	NM_001267843	1	1	0	1	1	4
hsa-let-7c-5p	MIMAT0000064	CMTM6	54918	NM_017801	1	1	0	1	1	4
hsa-let-7c-5p	MIMAT0000064	CNTRL	11064	XM_005251679	1	1	0	1	1	4
hsa-let-7c-5p	MIMAT0000064	COG5	10466	NM_001161520	1	1	0	1	1	4
hsa-let-7c-5p	MIMAT0000064	COL1A1	1277	NM_000088	0	1	1	1	1	4
hsa-let-7c-5p	MIMAT0000064	COL4A6	1288	XM_005262073	1	1	0	1	1	4
hsa-let-7c-5p	MIMAT0000064	COL5A2	1290	NM_000393	1	1	0	1	1	4
hsa-let-7c-5p	MIMAT0000064	CPA4	51200	NM_001163446	1	1	1	0	1	4
hsa-let-7c-5p	MIMAT0000064	CPEB1	64506	NM_001079534	1	1	1	0	1	4
hsa-let-7c-5p	MIMAT0000064	CPEB1	64506	NM_001079533	1	1	1	0	1	4
hsa-let-7c-5p	MIMAT0000064	CPEB1	64506	NM_001079535	1	1	1	0	1	4
hsa-let-7c-5p	MIMAT0000064	CPEB1	64506	NM_030594	1	1	1	0	1	4
hsa-let-7c-5p	MIMAT0000064	CPEB2	132864	NM_001177382	1	1	0	1	1	4
hsa-let-7c-5p	MIMAT0000064	CPM	1368	NM_001874	0	1	1	1	1	4
hsa-let-7c-5p	MIMAT0000064	CRB2	286204	NM_173689	1	1	0	1	1	4
hsa-let-7c-5p	MIMAT0000064	CREB3L2	64764	NM_194071	1	1	0	1	1	4
hsa-let-7c-5p	MIMAT0000064	CTPS2	56474	NM_019857	1	1	1	0	1	4
hsa-let-7c-5p	MIMAT0000064	CTPS2	56474	NM_175859	1	1	1	0	1	4
hsa-let-7c-5p	MIMAT0000064	CYB561D1	284613	NM_001134404	1	1	0	1	1	4
hsa-let-7c-5p	MIMAT0000064	CYP19A1	1588	NM_031226	1	1	0	1	1	4
hsa-let-7c-5p	MIMAT0000064	DAGLA	747	NM_006133	1	1	0	1	1	4
hsa-let-7c-5p	MIMAT0000064	DAPK2	23604	NM_014326	1	1	0	1	1	4
hsa-let-7c-5p	MIMAT0000064	DARS2	55157	XM_005245299	1	1	0	1	1	4
hsa-let-7c-5p	MIMAT0000064	DCLRE1B	64858	NM_022836	0	1	1	1	1	4
hsa-let-7c-5p	MIMAT0000064	DCUN1D3	123879	XM_005255098	1	1	0	1	1	4
hsa-let-7c-5p	MIMAT0000064	DDA1	79016	NM_024050	1	1	0	1	1	4
hsa-let-7c-5p	MIMAT0000064	DDI2	84301	NM_032341	1	1	1	0	1	4
hsa-let-7c-5p	MIMAT0000064	DDTL	100037417	NM_001084393	1	1	1	0	1	4
hsa-let-7c-5p	MIMAT0000064	DDX19A	55308	XM_005256030	1	1	0	1	1	4
hsa-let-7c-5p	MIMAT0000064	DDX19A	55308	NM_018332	1	1	1	0	1	4
hsa-let-7c-5p	MIMAT0000064	DDX19B	11269	NM_001014449	1	1	1	0	1	4
hsa-let-7c-5p	MIMAT0000064	DDX19B	11269	NM_001014451	1	1	1	0	1	4
hsa-let-7c-5p	MIMAT0000064	DEF8	54849	XM_005256316	1	1	0	1	1	4
hsa-let-7c-5p	MIMAT0000064	DGAT2	84649	NM_032564	1	1	0	1	1	4
hsa-let-7c-5p	MIMAT0000064	DGKE	8526	NM_003647	1	1	0	1	1	4
hsa-let-7c-5p	MIMAT0000064	DHX57	90957	NM_198963	0	1	1	1	1	4
hsa-let-7c-5p	MIMAT0000064	DIP2A	23181	NM_015151	0	1	1	1	1	4
hsa-let-7c-5p	MIMAT0000064	DLGAP4	22839	NM_014902	1	1	0	1	1	4
hsa-let-7c-5p	MIMAT0000064	DMD	1756	NM_004018	1	1	1	0	1	4
hsa-let-7c-5p	MIMAT0000064	DMD	1756	NM_004017	1	1	1	0	1	4
hsa-let-7c-5p	MIMAT0000064	DMD	1756	NM_004016	1	1	1	0	1	4
hsa-let-7c-5p	MIMAT0000064	DMD	1756	NM_004015	1	1	1	0	1	4
hsa-let-7c-5p	MIMAT0000064	DMD	1756	NM_004014	1	1	1	0	1	4
hsa-let-7c-5p	MIMAT0000064	DMD	1756	NM_004023	1	1	1	0	1	4
hsa-let-7c-5p	MIMAT0000064	DMD	1756	NM_004020	1	1	1	0	1	4
hsa-let-7c-5p	MIMAT0000064	DMD	1756	NM_004022	1	1	1	0	1	4
hsa-let-7c-5p	MIMAT0000064	DMD	1756	NM_004021	1	1	1	0	1	4
hsa-let-7c-5p	MIMAT0000064	DMD	1756	NM_004013	1	1	1	0	1	4
hsa-let-7c-5p	MIMAT0000064	DMD	1756	NM_004011	1	1	1	0	1	4
hsa-let-7c-5p	MIMAT0000064	DMD	1756	NM_004012	1	1	1	0	1	4
hsa-let-7c-5p	MIMAT0000064	DMD	1756	NM_004006	1	1	1	0	1	4
hsa-let-7c-5p	MIMAT0000064	DMD	1756	NM_004009	1	1	1	0	1	4
hsa-let-7c-5p	MIMAT0000064	DMD	1756	NM_000109	1	1	1	0	1	4
hsa-let-7c-5p	MIMAT0000064	DNA2	1763	NM_001080449	1	1	1	0	1	4
hsa-let-7c-5p	MIMAT0000064	DOK3	79930	XM_005265986	1	1	0	1	1	4
hsa-let-7c-5p	MIMAT0000064	DOK3	79930	NM_001144876	1	1	1	0	1	4
hsa-let-7c-5p	MIMAT0000064	DOK3	79930	NM_001144875	1	1	1	0	1	4
hsa-let-7c-5p	MIMAT0000064	DPH1	1801	XM_005256495	1	1	0	1	1	4
hsa-let-7c-5p	MIMAT0000064	DPH3	285381	NM_206831	1	1	1	0	1	4
hsa-let-7c-5p	MIMAT0000064	DPH3	285381	NM_001047434	1	1	1	0	1	4
hsa-let-7c-5p	MIMAT0000064	DSG3	1830	NM_001944	1	1	0	1	1	4
hsa-let-7c-5p	MIMAT0000064	DTX2	113878	NM_020892	1	1	0	1	1	4
hsa-let-7c-5p	MIMAT0000064	DTX3L	151636	NM_138287	1	1	0	1	1	4
hsa-let-7c-5p	MIMAT0000064	DTX4	23220	NM_015177	1	1	0	1	1	4
hsa-let-7c-5p	MIMAT0000064	DUSP3	1845	XM_005257117	1	1	0	1	1	4
hsa-let-7c-5p	MIMAT0000064	DVL3	1857	NM_004423	1	1	0	1	1	4
hsa-let-7c-5p	MIMAT0000064	E2F6	1876	NM_001278277	1	1	0	1	1	4
hsa-let-7c-5p	MIMAT0000064	EDA	1896	NM_001399	1	1	0	1	1	4
hsa-let-7c-5p	MIMAT0000064	EDEM3	80267	NM_025191	1	1	0	1	1	4
hsa-let-7c-5p	MIMAT0000064	EDN1	1906	NM_001168319	1	1	1	0	1	4
hsa-let-7c-5p	MIMAT0000064	EEA1	8411	NM_003566	1	1	0	1	1	4
hsa-let-7c-5p	MIMAT0000064	EFHD2	79180	NM_024329	1	1	0	1	1	4
hsa-let-7c-5p	MIMAT0000064	EGR3	1960	XM_005273425	1	1	0	1	1	4
hsa-let-7c-5p	MIMAT0000064	EIF2S2	8894	NM_003908	1	1	0	1	1	4
hsa-let-7c-5p	MIMAT0000064	ELAVL1	1994	NM_001419	1	1	0	1	1	4
hsa-let-7c-5p	MIMAT0000064	ELK4	2005	NM_001973	1	1	0	1	1	4
hsa-let-7c-5p	MIMAT0000064	ELMOD3	84173	XM_005264596	1	1	0	1	1	4
hsa-let-7c-5p	MIMAT0000064	ELOVL4	6785	NM_022726	1	1	0	1	1	4
hsa-let-7c-5p	MIMAT0000064	ENTHD2	146705	XM_005257066	1	1	0	1	1	4
hsa-let-7c-5p	MIMAT0000064	ENTPD7	57089	NM_020354	1	1	1	0	1	4
hsa-let-7c-5p	MIMAT0000064	EOGT	285203	XM_005264743	1	1	0	1	1	4
hsa-let-7c-5p	MIMAT0000064	ERCC4	2072	NM_005236	1	1	0	1	1	4
hsa-let-7c-5p	MIMAT0000064	ESPL1	9700	NM_012291	0	1	1	1	1	4
hsa-let-7c-5p	MIMAT0000064	ESR2	2100	NM_001214902	1	1	1	0	1	4
hsa-let-7c-5p	MIMAT0000064	EYA3	2140	NM_001990	1	1	0	1	1	4
hsa-let-7c-5p	MIMAT0000064	FADS2	9415	NM_004265	1	1	0	1	1	4
hsa-let-7c-5p	MIMAT0000064	FAM104A	84923	XM_005257741	1	1	0	1	1	4
hsa-let-7c-5p	MIMAT0000064	FAM118A	55007	NM_001104595	1	1	0	1	1	4
hsa-let-7c-5p	MIMAT0000064	FAM134C	162427	NM_178126	1	1	0	1	1	4
hsa-let-7c-5p	MIMAT0000064	FAM214B	80256	XM_005251588	1	1	0	1	1	4
hsa-let-7c-5p	MIMAT0000064	FAS	355	NM_000043	1	1	0	1	1	4
hsa-let-7c-5p	MIMAT0000064	FBXL12	54850	XM_005259966	1	1	0	1	1	4
hsa-let-7c-5p	MIMAT0000064	FBXO22	26263	NM_147188	1	1	0	1	1	4
hsa-let-7c-5p	MIMAT0000064	FBXO45	200933	NM_001105573	1	1	0	1	1	4
hsa-let-7c-5p	MIMAT0000064	FBXW4	6468	XM_005270053	1	1	0	1	1	4
hsa-let-7c-5p	MIMAT0000064	FCHSD1	89848	NM_033449	1	1	0	1	1	4
hsa-let-7c-5p	MIMAT0000064	FGF11	2256	NM_004112	1	1	0	1	1	4
hsa-let-7c-5p	MIMAT0000064	FIGN	55137	NM_018086	1	1	1	0	1	4
hsa-let-7c-5p	MIMAT0000064	FIGNL2	401720	NM_001013690	1	1	1	0	1	4
hsa-let-7c-5p	MIMAT0000064	FKTN	2218	NM_001079802	1	1	0	1	1	4
hsa-let-7c-5p	MIMAT0000064	FNDC3A	22862	NM_001278438	1	1	0	1	1	4
hsa-let-7c-5p	MIMAT0000064	FNDC3A	22862	NM_014923	1	1	1	0	1	4
hsa-let-7c-5p	MIMAT0000064	FNDC3A	22862	NM_001079673	1	1	1	0	1	4
hsa-let-7c-5p	MIMAT0000064	FNDC9	408263	NM_001001343	1	1	0	1	1	4
hsa-let-7c-5p	MIMAT0000064	FNIP1	96459	NM_133372	1	1	0	1	1	4
hsa-let-7c-5p	MIMAT0000064	FNIP2	57600	XM_005263156	1	1	0	1	1	4
hsa-let-7c-5p	MIMAT0000064	FOXP2	93986	NM_001172766	1	1	1	0	1	4
hsa-let-7c-5p	MIMAT0000064	FOXP2	93986	NM_014491	1	1	1	0	1	4
hsa-let-7c-5p	MIMAT0000064	FOXP2	93986	NM_148900	1	1	1	0	1	4
hsa-let-7c-5p	MIMAT0000064	FRAS1	80144	NM_025074	1	1	0	1	1	4
hsa-let-7c-5p	MIMAT0000064	FREM2	341640	NM_207361	1	1	0	1	1	4
hsa-let-7c-5p	MIMAT0000064	FZD3	7976	NM_145866	1	1	1	0	1	4
hsa-let-7c-5p	MIMAT0000064	FZD4	8322	NM_012193	1	1	0	1	1	4
hsa-let-7c-5p	MIMAT0000064	FZD5	7855	NM_003468	1	1	0	1	1	4
hsa-let-7c-5p	MIMAT0000064	GAB3	139716	NM_001081573	1	1	0	1	1	4
hsa-let-7c-5p	MIMAT0000064	GABBR2	9568	NM_005458	1	1	0	1	1	4
hsa-let-7c-5p	MIMAT0000064	GALC	2581	NM_000153	0	1	1	1	1	4
hsa-let-7c-5p	MIMAT0000064	GALE	2582	XM_005245835	1	1	0	1	1	4
hsa-let-7c-5p	MIMAT0000064	GAS7	8522	NM_003644	1	1	1	0	1	4
hsa-let-7c-5p	MIMAT0000064	GAS7	8522	NM_001130831	1	1	1	0	1	4
hsa-let-7c-5p	MIMAT0000064	GAS7	8522	NM_201432	1	1	1	0	1	4
hsa-let-7c-5p	MIMAT0000064	GCNT4	51301	XM_005248530	1	1	0	1	1	4
hsa-let-7c-5p	MIMAT0000064	GCNT4	51301	NM_016591	1	1	1	0	1	4
hsa-let-7c-5p	MIMAT0000064	GDAP2	54834	NM_017686	1	1	0	1	1	4
hsa-let-7c-5p	MIMAT0000064	GIMAP1	170575	NM_130759	1	1	0	1	1	4
hsa-let-7c-5p	MIMAT0000064	GJC1	10052	NM_005497	1	1	0	1	1	4
hsa-let-7c-5p	MIMAT0000064	GNPTAB	79158	NM_024312	1	1	0	1	1	4
hsa-let-7c-5p	MIMAT0000064	GOLGA6L9	440295	XM_005254396	1	1	0	1	1	4
hsa-let-7c-5p	MIMAT0000064	GOLT1B	51026	NM_016072	1	1	0	1	1	4
hsa-let-7c-5p	MIMAT0000064	GPCPD1	56261	XM_005260759	1	1	0	1	1	4
hsa-let-7c-5p	MIMAT0000064	GPIHBP1	338328	NM_178172	1	1	0	1	1	4
hsa-let-7c-5p	MIMAT0000064	GPR132	29933	NM_001278694	1	1	0	1	1	4
hsa-let-7c-5p	MIMAT0000064	GPR26	2849	NM_153442	1	1	1	0	1	4
hsa-let-7c-5p	MIMAT0000064	GXYLT1	283464	NM_173601	1	1	0	1	1	4
hsa-let-7c-5p	MIMAT0000064	GYG2	8908	NM_003918	1	1	0	1	1	4
hsa-let-7c-5p	MIMAT0000064	GYS2	2998	XM_005253352	1	1	0	1	1	4
hsa-let-7c-5p	MIMAT0000064	H2AFV	94239	NM_138635	1	1	0	1	1	4
hsa-let-7c-5p	MIMAT0000064	H6PD	9563	XM_005263539	1	1	0	1	1	4
hsa-let-7c-5p	MIMAT0000064	HDHD1	8226	NM_001135565	1	1	0	1	1	4
hsa-let-7c-5p	MIMAT0000064	HDLBP	3069	NM_005336	1	1	0	1	1	4
hsa-let-7c-5p	MIMAT0000064	HDX	139324	NM_001177478	1	1	1	0	1	4
hsa-let-7c-5p	MIMAT0000064	HDX	139324	NM_144657	1	1	1	0	1	4
hsa-let-7c-5p	MIMAT0000064	HELZ	9931	XM_005257888	1	1	0	1	1	4
hsa-let-7c-5p	MIMAT0000064	HELZ	9931	NM_014877	1	1	1	0	1	4
hsa-let-7c-5p	MIMAT0000064	HIC2	23119	XM_005261395	1	1	0	1	1	4
hsa-let-7c-5p	MIMAT0000064	HIC2	23119	NM_015094	1	1	1	0	1	4
hsa-let-7c-5p	MIMAT0000064	HIF1AN	55662	NM_017902	1	1	1	0	1	4
hsa-let-7c-5p	MIMAT0000064	HIF3A	64344	XM_005259152	1	1	0	1	1	4
hsa-let-7c-5p	MIMAT0000064	HIP1	3092	XM_005250304	1	1	0	1	1	4
hsa-let-7c-5p	MIMAT0000064	HIP1	3092	XM_005277569	1	1	0	1	1	4
hsa-let-7c-5p	MIMAT0000064	HMBOX1	79618	XM_005273634	1	1	0	1	1	4
hsa-let-7c-5p	MIMAT0000064	HOXA1	3198	NM_153620	1	1	1	0	1	4
hsa-let-7c-5p	MIMAT0000064	HOXD1	3231	NM_024501	0	1	1	1	1	4
hsa-let-7c-5p	MIMAT0000064	HS2ST1	9653	NM_012262	1	1	0	1	1	4
hsa-let-7c-5p	MIMAT0000064	HSPA14	51182	NM_001278205	1	1	0	1	1	4
hsa-let-7c-5p	MIMAT0000064	ICMT	23463	NM_012405	1	1	0	1	1	4
hsa-let-7c-5p	MIMAT0000064	ICOS	29851	XM_005246482	1	1	0	1	1	4
hsa-let-7c-5p	MIMAT0000064	IFI44L	10964	NM_006820	1	1	1	0	1	4
hsa-let-7c-5p	MIMAT0000064	IFNLR1	163702	NM_170743	1	1	0	1	1	4
hsa-let-7c-5p	MIMAT0000064	IFT80	57560	XM_005247675	1	1	0	1	1	4
hsa-let-7c-5p	MIMAT0000064	IFT80	57560	NM_001190242	1	1	1	0	1	4
hsa-let-7c-5p	MIMAT0000064	IFT80	57560	NM_020800	1	1	1	0	1	4
hsa-let-7c-5p	MIMAT0000064	IFT80	57560	NM_001190241	1	1	1	0	1	4
hsa-let-7c-5p	MIMAT0000064	IGDCC4	57722	NM_020962	1	1	0	1	1	4
hsa-let-7c-5p	MIMAT0000064	IGF1	3479	NM_001111283	1	1	0	1	1	4
hsa-let-7c-5p	MIMAT0000064	IGF2BP1	10642	NM_001160423	1	1	1	0	1	4
hsa-let-7c-5p	MIMAT0000064	IGF2BP2	10644	NM_001007225	1	1	1	0	1	4
hsa-let-7c-5p	MIMAT0000064	IKBKAP	8518	NM_003640	0	1	1	1	1	4
hsa-let-7c-5p	MIMAT0000064	IL13	3596	NM_002188	1	1	0	1	1	4
hsa-let-7c-5p	MIMAT0000064	IL17RA	23765	NM_014339	1	1	0	1	1	4
hsa-let-7c-5p	MIMAT0000064	IL22RA1	58985	XM_005245952	1	1	0	1	1	4
hsa-let-7c-5p	MIMAT0000064	INSR	3643	NM_000208	1	1	0	1	1	4
hsa-let-7c-5p	MIMAT0000064	INTS2	57508	NM_020748	1	1	0	1	1	4
hsa-let-7c-5p	MIMAT0000064	IPO9	55705	NM_018085	1	1	0	1	1	4
hsa-let-7c-5p	MIMAT0000064	IRF5	3663	XM_005250317	1	1	0	1	1	4
hsa-let-7c-5p	MIMAT0000064	IRGQ	126298	NM_001007561	1	1	0	1	1	4
hsa-let-7c-5p	MIMAT0000064	ITGA11	22801	XM_005254227	1	1	0	1	1	4
hsa-let-7c-5p	MIMAT0000064	ITGBL1	9358	XM_005254100	1	1	0	1	1	4
hsa-let-7c-5p	MIMAT0000064	KANK4	163782	NM_181712	1	1	0	1	1	4
hsa-let-7c-5p	MIMAT0000064	KATNAL1	84056	XM_005266574	1	1	0	1	1	4
hsa-let-7c-5p	MIMAT0000064	KCNA6	3742	XM_005253686	1	1	0	1	1	4
hsa-let-7c-5p	MIMAT0000064	KCNJ10	3766	NM_002241	1	1	0	1	1	4
hsa-let-7c-5p	MIMAT0000064	KCNJ11	3767	XM_005252910	1	1	0	1	1	4
hsa-let-7c-5p	MIMAT0000064	KCTD21	283219	XM_005273927	1	1	0	1	1	4
hsa-let-7c-5p	MIMAT0000064	KCTD21	283219	NM_001029859	1	1	1	0	1	4
hsa-let-7c-5p	MIMAT0000064	KHNYN	23351	NM_015299	1	1	0	1	1	4
hsa-let-7c-5p	MIMAT0000064	KIAA0930	23313	NM_015264	1	1	0	1	1	4
hsa-let-7c-5p	MIMAT0000064	KIAA1958	158405	XM_005251739	1	1	0	1	1	4
hsa-let-7c-5p	MIMAT0000064	KLF8	11279	NM_007250	1	1	0	1	1	4
hsa-let-7c-5p	MIMAT0000064	KLF9	687	NM_001206	1	1	0	1	1	4
hsa-let-7c-5p	MIMAT0000064	KLHDC8B	200942	NM_173546	1	1	0	1	1	4
hsa-let-7c-5p	MIMAT0000064	KLHL31	401265	NM_001003760	0	1	1	1	1	4
hsa-let-7c-5p	MIMAT0000064	KLHL36	79786	XM_005256149	1	1	0	1	1	4
hsa-let-7c-5p	MIMAT0000064	KLHL6	89857	NM_130446	1	1	0	1	1	4
hsa-let-7c-5p	MIMAT0000064	KLK10	5655	NM_002776	1	1	0	1	1	4
hsa-let-7c-5p	MIMAT0000064	KLK6	5653	NM_001012964	1	1	0	1	1	4
hsa-let-7c-5p	MIMAT0000064	KLK6	5653	NM_002774	1	1	0	1	1	4
hsa-let-7c-5p	MIMAT0000064	KPNA4	3840	NM_002268	1	1	0	1	1	4
hsa-let-7c-5p	MIMAT0000064	LAMP2	3920	NM_002294	1	1	0	1	1	4
hsa-let-7c-5p	MIMAT0000064	LHCGR	3973	NM_000233	1	1	0	1	1	4
hsa-let-7c-5p	MIMAT0000064	LHX9	56956	XM_005245350	1	1	0	1	1	4
hsa-let-7c-5p	MIMAT0000064	LIMD2	80774	NM_030576	0	1	1	1	1	4
hsa-let-7c-5p	MIMAT0000064	LIN28A	79727	NM_024674	1	1	0	1	1	4
hsa-let-7c-5p	MIMAT0000064	LINGO1	84894	XM_005254725	1	1	0	1	1	4
hsa-let-7c-5p	MIMAT0000064	LIPH	200879	NM_139248	1	1	0	1	1	4
hsa-let-7c-5p	MIMAT0000064	LIPT2	387787	NM_001144869	1	1	1	0	1	4
hsa-let-7c-5p	MIMAT0000064	LMX1A	4009	NM_177398	1	1	0	1	1	4
hsa-let-7c-5p	MIMAT0000064	LPGAT1	9926	XM_005273364	1	1	0	1	1	4
hsa-let-7c-5p	MIMAT0000064	LPGAT1	9926	NM_014873	1	1	1	0	1	4
hsa-let-7c-5p	MIMAT0000064	LRIG1	26018	XM_005264724	1	1	0	1	1	4
hsa-let-7c-5p	MIMAT0000064	LRIG2	9860	XM_005271369	1	1	0	1	1	4
hsa-let-7c-5p	MIMAT0000064	LRIG2	9860	NM_014813	1	1	1	0	1	4
hsa-let-7c-5p	MIMAT0000064	LRIG3	121227	NM_001136051	1	1	1	0	1	4
hsa-let-7c-5p	MIMAT0000064	LRTOMT	220074	NM_001145309	1	1	0	1	1	4
hsa-let-7c-5p	MIMAT0000064	LTN1	26046	NM_015565	1	1	0	1	1	4
hsa-let-7c-5p	MIMAT0000064	LYRM2	57226	NM_020466	1	1	0	1	1	4
hsa-let-7c-5p	MIMAT0000064	MAN2A2	4122	NM_006122	1	1	0	1	1	4
hsa-let-7c-5p	MIMAT0000064	MAP3K1	4214	NM_005921	1	1	0	1	1	4
hsa-let-7c-5p	MIMAT0000064	MAPK11	5600	NM_002751	1	1	0	1	1	4
hsa-let-7c-5p	MIMAT0000064	MAPK4	5596	XM_005258299	1	1	0	1	1	4
hsa-let-7c-5p	MIMAT0000064	MAPK6	5597	XM_005254536	1	1	0	1	1	4
hsa-let-7c-5p	MIMAT0000064	MAPK6	5597	NM_002748	1	1	1	0	1	4
hsa-let-7c-5p	MIMAT0000064	MAPK8	5599	XM_005269974	1	1	0	1	1	4
hsa-let-7c-5p	MIMAT0000064	MATR3	9782	NM_199189	1	1	0	1	1	4
hsa-let-7c-5p	MIMAT0000064	MBD2	8932	NM_003927	1	1	0	1	1	4
hsa-let-7c-5p	MIMAT0000064	MC2R	4158	NM_000529	0	1	1	1	1	4
hsa-let-7c-5p	MIMAT0000064	MDM4	4194	NM_001204172	1	1	1	0	1	4
hsa-let-7c-5p	MIMAT0000064	MDM4	4194	NM_001204171	1	1	1	0	1	4
hsa-let-7c-5p	MIMAT0000064	MECP2	4204	XM_005274683	1	1	0	1	1	4
hsa-let-7c-5p	MIMAT0000064	MECP2	4204	XM_005277853	1	1	0	1	1	4
hsa-let-7c-5p	MIMAT0000064	MED28	80306	NM_025205	1	1	1	0	1	4
hsa-let-7c-5p	MIMAT0000064	MED8	112950	NM_001001653	1	1	0	1	1	4
hsa-let-7c-5p	MIMAT0000064	MED8	112950	NM_201542	1	1	1	0	1	4
hsa-let-7c-5p	MIMAT0000064	MEF2D	4209	NM_005920	1	1	0	1	1	4
hsa-let-7c-5p	MIMAT0000064	MFSD8	256471	NM_152778	1	1	0	1	1	4
hsa-let-7c-5p	MIMAT0000064	MGAT3	4248	NM_002409	1	1	0	1	1	4
hsa-let-7c-5p	MIMAT0000064	MGAT4A	11320	NM_012214	0	1	1	1	1	4
hsa-let-7c-5p	MIMAT0000064	MGLL	11343	NM_007283	1	1	0	1	1	4
hsa-let-7c-5p	MIMAT0000064	MICALCL	84953	XM_005253178	1	1	0	1	1	4
hsa-let-7c-5p	MIMAT0000064	MIEF1	54471	XM_005261651	1	1	0	1	1	4
hsa-let-7c-5p	MIMAT0000064	MKLN1	4289	NM_001145354	1	1	0	1	1	4
hsa-let-7c-5p	MIMAT0000064	MMACHC	25974	NM_015506	1	1	0	1	1	4
hsa-let-7c-5p	MIMAT0000064	MMS22L	253714	XM_005266893	1	1	0	1	1	4
hsa-let-7c-5p	MIMAT0000064	MMS22L	253714	NM_198468	1	1	1	0	1	4
hsa-let-7c-5p	MIMAT0000064	MOB3B	79817	NM_024761	1	1	0	1	1	4
hsa-let-7c-5p	MIMAT0000064	MRAS	22808	NM_012219	1	1	0	1	1	4
hsa-let-7c-5p	MIMAT0000064	MRM1	79922	NM_024864	1	1	0	1	1	4
hsa-let-7c-5p	MIMAT0000064	MSN	4478	XM_005262269	1	1	0	1	1	4
hsa-let-7c-5p	MIMAT0000064	MTAP	4507	NM_002451	1	1	0	1	1	4
hsa-let-7c-5p	MIMAT0000064	MTDH	92140	NM_178812	1	1	0	1	1	4
hsa-let-7c-5p	MIMAT0000064	MTTP	4547	NM_000253	1	1	0	1	1	4
hsa-let-7c-5p	MIMAT0000064	MUC4	4585	NM_018406	1	1	0	1	1	4
hsa-let-7c-5p	MIMAT0000064	MXD1	4084	NM_002357	1	1	0	1	1	4
hsa-let-7c-5p	MIMAT0000064	MXRA7	439921	XM_005257382	1	1	0	1	1	4
hsa-let-7c-5p	MIMAT0000064	MYO1F	4542	NM_012335	0	1	1	1	1	4
hsa-let-7c-5p	MIMAT0000064	MYO5B	4645	NM_001080467	1	1	0	1	1	4
hsa-let-7c-5p	MIMAT0000064	MYZAP	100820829	XM_005254112	1	1	0	1	1	4
hsa-let-7c-5p	MIMAT0000064	NAA38	51691	NM_016200	1	1	1	0	1	4
hsa-let-7c-5p	MIMAT0000064	NAGA	4668	NM_000262	1	1	0	1	1	4
hsa-let-7c-5p	MIMAT0000064	NAP1L1	4673	NM_139207	1	1	1	0	1	4
hsa-let-7c-5p	MIMAT0000064	NDST2	8509	NM_003635	1	1	0	1	1	4
hsa-let-7c-5p	MIMAT0000064	NDUFA4	4697	NM_002489	1	1	0	1	1	4
hsa-let-7c-5p	MIMAT0000064	NEK3	4752	NM_152720	1	1	1	0	1	4
hsa-let-7c-5p	MIMAT0000064	NEK3	4752	NM_001146099	1	1	1	0	1	4
hsa-let-7c-5p	MIMAT0000064	NEK3	4752	NM_002498	1	1	1	0	1	4
hsa-let-7c-5p	MIMAT0000064	NFIA	4774	NM_001134673	1	1	0	1	1	4
hsa-let-7c-5p	MIMAT0000064	NGF	4803	NM_002506	1	1	1	0	1	4
hsa-let-7c-5p	MIMAT0000064	NHLRC3	387921	NM_001012754	1	1	0	1	1	4
hsa-let-7c-5p	MIMAT0000064	NIPA1	123606	NM_144599	1	1	0	1	1	4
hsa-let-7c-5p	MIMAT0000064	NLN	57486	NM_020726	1	1	0	1	1	4
hsa-let-7c-5p	MIMAT0000064	NLRC3	197358	NM_178844	1	1	0	1	1	4
hsa-let-7c-5p	MIMAT0000064	NME4	4833	XM_005255335	1	1	0	1	1	4
hsa-let-7c-5p	MIMAT0000064	NOS1	4842	NM_001204218	1	1	0	1	1	4
hsa-let-7c-5p	MIMAT0000064	NQO1	1728	XM_005255830	1	1	0	1	1	4
hsa-let-7c-5p	MIMAT0000064	NR6A1	2649	NM_033334	1	1	0	1	1	4
hsa-let-7c-5p	MIMAT0000064	NRTN	4902	NM_004558	1	1	0	1	1	4
hsa-let-7c-5p	MIMAT0000064	NTN1	9423	NM_004822	1	1	0	1	1	4
hsa-let-7c-5p	MIMAT0000064	NUDT15	55270	NM_018283	1	1	0	1	1	4
hsa-let-7c-5p	MIMAT0000064	NYNRIN	57523	NM_025081	1	1	0	1	1	4
hsa-let-7c-5p	MIMAT0000064	ODF2L	57489	NM_001184766	1	1	1	0	1	4
hsa-let-7c-5p	MIMAT0000064	ODF2L	57489	NM_001184765	1	1	1	0	1	4
hsa-let-7c-5p	MIMAT0000064	OPA3	80207	NM_001017989	1	1	1	0	1	4
hsa-let-7c-5p	MIMAT0000064	OPRM1	4988	NM_001145287	1	1	0	1	1	4
hsa-let-7c-5p	MIMAT0000064	OSMR	9180	NM_003999	1	1	0	1	1	4
hsa-let-7c-5p	MIMAT0000064	P2RX1	5023	NM_002558	1	1	0	1	1	4
hsa-let-7c-5p	MIMAT0000064	P2RY2	5029	NM_176072	1	1	0	1	1	4
hsa-let-7c-5p	MIMAT0000064	PACS2	23241	NM_001100913	1	1	0	1	1	4
hsa-let-7c-5p	MIMAT0000064	PAFAH2	5051	XM_005245874	1	1	0	1	1	4
hsa-let-7c-5p	MIMAT0000064	PAK1	5058	NM_001128620	1	1	0	1	1	4
hsa-let-7c-5p	MIMAT0000064	PALD1	27143	NM_014431	1	1	0	1	1	4
hsa-let-7c-5p	MIMAT0000064	PAPPA	5069	NM_002581	1	1	0	1	1	4
hsa-let-7c-5p	MIMAT0000064	PARM1	25849	NM_015393	1	1	0	1	1	4
hsa-let-7c-5p	MIMAT0000064	PARP16	54956	XM_005254516	1	1	0	1	1	4
hsa-let-7c-5p	MIMAT0000064	PARP8	79668	NM_001178055	1	1	0	1	1	4
hsa-let-7c-5p	MIMAT0000064	PARP9	83666	NM_001146106	1	1	0	1	1	4
hsa-let-7c-5p	MIMAT0000064	PARVB	29780	NM_001003828	1	1	0	1	1	4
hsa-let-7c-5p	MIMAT0000064	PAX2	5076	NM_003988	1	1	0	1	1	4
hsa-let-7c-5p	MIMAT0000064	PBX1	5087	XM_005245228	1	1	0	1	1	4
hsa-let-7c-5p	MIMAT0000064	PBX2	5089	NM_002586	1	1	0	1	1	4
hsa-let-7c-5p	MIMAT0000064	PBX3	5090	NM_001134778	1	1	1	0	1	4
hsa-let-7c-5p	MIMAT0000064	PCDH19	57526	NM_001184880	1	1	0	1	1	4
hsa-let-7c-5p	MIMAT0000064	PCGF3	10336	XM_005272253	1	1	0	1	1	4
hsa-let-7c-5p	MIMAT0000064	PDE12	201626	NM_177966	1	1	0	1	1	4
hsa-let-7c-5p	MIMAT0000064	PDE4B	5142	NM_001037341	1	1	0	1	1	4
hsa-let-7c-5p	MIMAT0000064	PDGFB	5155	NM_002608	1	1	0	1	1	4
hsa-let-7c-5p	MIMAT0000064	PDPR	55066	XM_005256016	1	1	0	1	1	4
hsa-let-7c-5p	MIMAT0000064	PDPR	55066	NM_017990	1	1	1	0	1	4
hsa-let-7c-5p	MIMAT0000064	PEX11B	8799	NM_003846	1	1	0	1	1	4
hsa-let-7c-5p	MIMAT0000064	PGM2L1	283209	NM_173582	1	1	0	1	1	4
hsa-let-7c-5p	MIMAT0000064	PGR	5241	NM_000926	1	1	0	1	1	4
hsa-let-7c-5p	MIMAT0000064	PHACTR4	65979	NM_001048183	1	1	0	1	1	4
hsa-let-7c-5p	MIMAT0000064	PIGA	5277	NM_020473	1	1	1	0	1	4
hsa-let-7c-5p	MIMAT0000064	PIK3C2B	5287	XM_005245260	1	1	0	1	1	4
hsa-let-7c-5p	MIMAT0000064	PKP1	5317	NM_000299	1	1	0	1	1	4
hsa-let-7c-5p	MIMAT0000064	PLA2G2F	64600	NM_022819	1	1	0	1	1	4
hsa-let-7c-5p	MIMAT0000064	PLAGL2	5326	XM_005260436	1	1	0	1	1	4
hsa-let-7c-5p	MIMAT0000064	PLCB2	5330	NM_004573	1	1	0	1	1	4
hsa-let-7c-5p	MIMAT0000064	PLCXD1	55344	NM_018390	1	1	0	1	1	4
hsa-let-7c-5p	MIMAT0000064	PLD5	200150	NM_152666	0	1	1	1	1	4
hsa-let-7c-5p	MIMAT0000064	PLEKHG6	55200	NM_001144857	1	1	0	1	1	4
hsa-let-7c-5p	MIMAT0000064	PLEKHG7	440107	XM_005268874	1	1	0	1	1	4
hsa-let-7c-5p	MIMAT0000064	PLEKHG7	440107	NM_001004330	1	1	1	0	1	4
hsa-let-7c-5p	MIMAT0000064	PLXNA2	5362	NM_025179	1	1	0	1	1	4
hsa-let-7c-5p	MIMAT0000064	PLXNA4	91584	NM_020911	1	1	0	1	1	4
hsa-let-7c-5p	MIMAT0000064	PLXND1	23129	NM_015103	1	1	0	1	1	4
hsa-let-7c-5p	MIMAT0000064	POLL	27343	NM_001174084	1	1	0	1	1	4
hsa-let-7c-5p	MIMAT0000064	POLQ	10721	NM_199420	1	1	0	1	1	4
hsa-let-7c-5p	MIMAT0000064	POLR2D	5433	XM_005263693	1	1	0	1	1	4
hsa-let-7c-5p	MIMAT0000064	POLR3A	11128	NM_007055	1	1	0	1	1	4
hsa-let-7c-5p	MIMAT0000064	POLR3D	661	NM_001722	1	1	0	1	1	4
hsa-let-7c-5p	MIMAT0000064	POTEM	641455	NM_001145442	1	1	1	0	1	4
hsa-let-7c-5p	MIMAT0000064	POU2F2	5452	XM_005259009	1	1	0	1	1	4
hsa-let-7c-5p	MIMAT0000064	PPAPDC1B	84513	NM_001102559	1	1	1	0	1	4
hsa-let-7c-5p	MIMAT0000064	PPIA	5478	NM_021130	1	1	0	1	1	4
hsa-let-7c-5p	MIMAT0000064	PPP1R12B	4660	XM_005245201	1	1	0	1	1	4
hsa-let-7c-5p	MIMAT0000064	PPP1R8	5511	NM_138558	1	1	0	1	1	4
hsa-let-7c-5p	MIMAT0000064	PPP2R2A	5520	NM_002717	1	1	0	1	1	4
hsa-let-7c-5p	MIMAT0000064	PPT2	9374	NM_005155	1	1	0	1	1	4
hsa-let-7c-5p	MIMAT0000064	PQLC2	54896	NM_001040125	1	1	0	1	1	4
hsa-let-7c-5p	MIMAT0000064	PRDM2	7799	NM_001007257	1	1	1	0	1	4
hsa-let-7c-5p	MIMAT0000064	PRDM2	7799	NM_015866	1	1	1	0	1	4
hsa-let-7c-5p	MIMAT0000064	PRKAA2	5563	NM_006252	1	1	0	1	1	4
hsa-let-7c-5p	MIMAT0000064	PRKAB2	5565	NM_005399	1	1	0	1	1	4
hsa-let-7c-5p	MIMAT0000064	PRKCB	5579	NM_002738	1	1	0	1	1	4
hsa-let-7c-5p	MIMAT0000064	PRLR	5618	NM_000949	1	1	0	1	1	4
hsa-let-7c-5p	MIMAT0000064	PSKH1	5681	NM_006742	1	1	0	1	1	4
hsa-let-7c-5p	MIMAT0000064	PTAFR	5724	NM_001164722	1	1	1	0	1	4
hsa-let-7c-5p	MIMAT0000064	PTAFR	5724	NM_001164721	1	1	1	0	1	4
hsa-let-7c-5p	MIMAT0000064	PTAFR	5724	NM_000952	1	1	1	0	1	4
hsa-let-7c-5p	MIMAT0000064	PTPN4	5775	NM_002830	1	1	0	1	1	4
hsa-let-7c-5p	MIMAT0000064	PTPN7	5778	NM_002832	1	1	0	1	1	4
hsa-let-7c-5p	MIMAT0000064	PTPRB	5787	NM_001109754	1	1	0	1	1	4
hsa-let-7c-5p	MIMAT0000064	PTPRD	5789	XM_005251529	1	1	0	1	1	4
hsa-let-7c-5p	MIMAT0000064	PUS7L	83448	XM_005269166	1	1	0	1	1	4
hsa-let-7c-5p	MIMAT0000064	PVR	5817	NM_006505	1	1	0	1	1	4
hsa-let-7c-5p	MIMAT0000064	PXT1	222659	NM_152990	1	1	0	1	1	4
hsa-let-7c-5p	MIMAT0000064	QARS	5859	NM_005051	1	1	0	1	1	4
hsa-let-7c-5p	MIMAT0000064	RAB11FIP4	84440	NM_032932	0	1	1	1	1	4
hsa-let-7c-5p	MIMAT0000064	RAB18	22931	NM_001256410	1	1	0	1	1	4
hsa-let-7c-5p	MIMAT0000064	RAB3GAP2	25782	NM_012414	1	1	0	1	1	4
hsa-let-7c-5p	MIMAT0000064	RAD1	5810	NM_002853	1	1	0	1	1	4
hsa-let-7c-5p	MIMAT0000064	RAD18	56852	NM_020165	1	1	0	1	1	4
hsa-let-7c-5p	MIMAT0000064	RAD9A	5883	NM_004584	1	1	0	1	1	4
hsa-let-7c-5p	MIMAT0000064	RALB	5899	XM_005263728	1	1	0	1	1	4
hsa-let-7c-5p	MIMAT0000064	RANBP2	5903	XM_005264002	1	1	0	1	1	4
hsa-let-7c-5p	MIMAT0000064	RASA4	10156	NM_006989	1	1	0	1	1	4
hsa-let-7c-5p	MIMAT0000064	RASGRP1	10125	NM_005739	1	1	0	1	1	4
hsa-let-7c-5p	MIMAT0000064	RBM15B	29890	NM_013286	1	1	0	1	1	4
hsa-let-7c-5p	MIMAT0000064	RBM38	55544	XM_005260445	1	1	0	1	1	4
hsa-let-7c-5p	MIMAT0000064	RBMS1	5937	XM_005246738	1	1	0	1	1	4
hsa-let-7c-5p	MIMAT0000064	RFC1	5981	NM_001204747	1	1	0	1	1	4
hsa-let-7c-5p	MIMAT0000064	RFT1	91869	NM_052859	1	1	0	1	1	4
hsa-let-7c-5p	MIMAT0000064	RGPD5	84220	XM_005263819	1	1	0	1	1	4
hsa-let-7c-5p	MIMAT0000064	RGPD5	84220	NM_005054	1	1	1	0	1	4
hsa-let-7c-5p	MIMAT0000064	RGPD8	727851	NM_001164463	1	1	1	0	1	4
hsa-let-7c-5p	MIMAT0000064	RGS16	6004	NM_002928	1	1	0	1	1	4
hsa-let-7c-5p	MIMAT0000064	RHD	6007	NM_016124	1	1	0	1	1	4
hsa-let-7c-5p	MIMAT0000064	RHPN2	85415	NM_033103	1	1	0	1	1	4
hsa-let-7c-5p	MIMAT0000064	RICTOR	253260	XM_005248277	1	1	0	1	1	4
hsa-let-7c-5p	MIMAT0000064	RIOK3	8780	NM_003831	1	1	0	1	1	4
hsa-let-7c-5p	MIMAT0000064	RMI2	116028	NM_152308	0	1	1	1	1	4
hsa-let-7c-5p	MIMAT0000064	RNF165	494470	XM_005258281	1	1	0	1	1	4
hsa-let-7c-5p	MIMAT0000064	RNF170	81790	NM_001160223	1	1	0	1	1	4
hsa-let-7c-5p	MIMAT0000064	RNF207	388591	NM_207396	1	1	0	1	1	4
hsa-let-7c-5p	MIMAT0000064	RNMT	8731	NM_003799	1	1	0	1	1	4
hsa-let-7c-5p	MIMAT0000064	ROBO4	54538	NM_019055	1	1	0	1	1	4
hsa-let-7c-5p	MIMAT0000064	RPL34	6164	NM_033625	1	1	0	1	1	4
hsa-let-7c-5p	MIMAT0000064	RPS6KA3	6197	XM_005274574	1	1	0	1	1	4
hsa-let-7c-5p	MIMAT0000064	RPUSD3	285367	NM_001142547	1	1	1	0	1	4
hsa-let-7c-5p	MIMAT0000064	RRM2	6241	NM_001165931	1	1	0	1	1	4
hsa-let-7c-5p	MIMAT0000064	RTKN	6242	NM_033046	1	1	0	1	1	4
hsa-let-7c-5p	MIMAT0000064	RUNX1T1	862	NM_001198625	1	1	0	1	1	4
hsa-let-7c-5p	MIMAT0000064	SAMD12	401474	NM_001101676	1	1	0	1	1	4
hsa-let-7c-5p	MIMAT0000064	SCN11A	11280	NM_014139	1	1	0	1	1	4
hsa-let-7c-5p	MIMAT0000064	SCN4B	6330	NM_174934	1	1	0	1	1	4
hsa-let-7c-5p	MIMAT0000064	SCN5A	6331	NM_001099404	1	1	0	1	1	4
hsa-let-7c-5p	MIMAT0000064	SCN5A	6331	NM_198056	1	1	0	1	1	4
hsa-let-7c-5p	MIMAT0000064	SDR42E1	93517	NM_145168	1	1	1	0	1	4
hsa-let-7c-5p	MIMAT0000064	SEC14L5	9717	NM_014692	1	1	0	1	1	4
hsa-let-7c-5p	MIMAT0000064	SEMA3F	6405	XM_005265381	1	1	0	1	1	4
hsa-let-7c-5p	MIMAT0000064	SEMA4C	54910	XM_005263973	1	1	0	1	1	4
hsa-let-7c-5p	MIMAT0000064	SEMA4F	10505	NM_004263	1	1	0	1	1	4
hsa-let-7c-5p	MIMAT0000064	SEMA4G	57715	XM_005270009	1	1	0	1	1	4
hsa-let-7c-5p	MIMAT0000064	SERF2	10169	NM_001199877	1	1	1	0	1	4
hsa-let-7c-5p	MIMAT0000064	SERF2	10169	NM_001199878	1	1	1	0	1	4
hsa-let-7c-5p	MIMAT0000064	SERF2	10169	NM_001199876	1	1	1	0	1	4
hsa-let-7c-5p	MIMAT0000064	SERF2	10169	NM_001018108	1	1	1	0	1	4
hsa-let-7c-5p	MIMAT0000064	SERF2	10169	NM_001199875	1	1	1	0	1	4
hsa-let-7c-5p	MIMAT0000064	SERPINB9	5272	NM_004155	1	1	0	1	1	4
hsa-let-7c-5p	MIMAT0000064	SERPING1	710	NM_000062	1	1	0	1	1	4
hsa-let-7c-5p	MIMAT0000064	SESTD1	91404	NM_178123	1	1	0	1	1	4
hsa-let-7c-5p	MIMAT0000064	SFMBT1	51460	XM_005265220	1	1	0	1	1	4
hsa-let-7c-5p	MIMAT0000064	SFT2D3	84826	NM_032740	1	1	0	1	1	4
hsa-let-7c-5p	MIMAT0000064	SFTPB	6439	NM_000542	1	1	0	1	1	4
hsa-let-7c-5p	MIMAT0000064	SGCD	6444	NM_000337	1	1	0	1	1	4
hsa-let-7c-5p	MIMAT0000064	SIGLEC5	8778	NM_003830	1	1	0	1	1	4
hsa-let-7c-5p	MIMAT0000064	SLAMF6	114836	NM_001184714	1	1	0	1	1	4
hsa-let-7c-5p	MIMAT0000064	SLC10A2	6555	NM_000452	1	1	0	1	1	4
hsa-let-7c-5p	MIMAT0000064	SLC10A7	84068	XM_005263276	1	1	0	1	1	4
hsa-let-7c-5p	MIMAT0000064	SLC11A2	4891	NM_001174129	1	1	0	1	1	4
hsa-let-7c-5p	MIMAT0000064	SLC12A9	56996	NM_020246	1	1	0	1	1	4
hsa-let-7c-5p	MIMAT0000064	SLC19A3	80704	XM_005246871	1	1	0	1	1	4
hsa-let-7c-5p	MIMAT0000064	SLC1A4	6509	NM_003038	1	1	0	1	1	4
hsa-let-7c-5p	MIMAT0000064	SLC22A23	63027	XM_005249285	1	1	0	1	1	4
hsa-let-7c-5p	MIMAT0000064	SLC25A18	83733	XM_005261288	1	1	0	1	1	4
hsa-let-7c-5p	MIMAT0000064	SLC25A24	29957	NM_013386	0	1	1	1	1	4
hsa-let-7c-5p	MIMAT0000064	SLC29A3	55315	NM_001174098	1	1	0	1	1	4
hsa-let-7c-5p	MIMAT0000064	SLC30A6	55676	NM_001193513	1	1	0	1	1	4
hsa-let-7c-5p	MIMAT0000064	SLC30A7	148867	NM_133496	1	1	0	1	1	4
hsa-let-7c-5p	MIMAT0000064	SLC35A2	7355	NM_001042498	1	1	0	1	1	4
hsa-let-7c-5p	MIMAT0000064	SLC35B4	84912	NM_032826	1	1	0	1	1	4
hsa-let-7c-5p	MIMAT0000064	SLC45A4	57210	XM_005251001	1	1	0	1	1	4
hsa-let-7c-5p	MIMAT0000064	SLC5A1	6523	NM_000343	1	1	0	1	1	4
hsa-let-7c-5p	MIMAT0000064	SLC5A9	200010	XM_005270588	1	1	0	1	1	4
hsa-let-7c-5p	MIMAT0000064	SLC5A9	200010	NM_001011547	1	1	1	0	1	4
hsa-let-7c-5p	MIMAT0000064	SLC5A9	200010	NM_001135181	1	1	1	0	1	4
hsa-let-7c-5p	MIMAT0000064	SLC6A1	6529	XM_005265410	1	1	0	1	1	4
hsa-let-7c-5p	MIMAT0000064	SLC8A2	6543	NM_015063	1	1	0	1	1	4
hsa-let-7c-5p	MIMAT0000064	SLCO2A1	6578	NM_005630	1	1	0	1	1	4
hsa-let-7c-5p	MIMAT0000064	SMAD2	4087	NM_001003652	1	1	0	1	1	4
hsa-let-7c-5p	MIMAT0000064	SMARCA5	8467	NM_003601	1	1	0	1	1	4
hsa-let-7c-5p	MIMAT0000064	SMARCAD1	56916	NM_001128430	1	1	1	0	1	4
hsa-let-7c-5p	MIMAT0000064	SMARCAD1	56916	NM_020159	1	1	1	0	1	4
hsa-let-7c-5p	MIMAT0000064	SMARCC1	6599	NM_003074	1	1	0	1	1	4
hsa-let-7c-5p	MIMAT0000064	SMC1A	8243	NM_001281463	1	1	0	1	1	4
hsa-let-7c-5p	MIMAT0000064	SMC1A	8243	NM_006306	1	1	1	0	1	4
hsa-let-7c-5p	MIMAT0000064	SMIM3	85027	NM_032947	1	1	1	0	1	4
hsa-let-7c-5p	MIMAT0000064	SMUG1	23583	NM_014311	1	1	0	1	1	4
hsa-let-7c-5p	MIMAT0000064	SNN	8303	NM_003498	1	1	0	1	1	4
hsa-let-7c-5p	MIMAT0000064	SNX1	6642	NM_003099	1	1	0	1	1	4
hsa-let-7c-5p	MIMAT0000064	SNX11	29916	NM_152244	1	1	0	1	1	4
hsa-let-7c-5p	MIMAT0000064	SNX16	64089	NM_152837	1	1	1	0	1	4
hsa-let-7c-5p	MIMAT0000064	SNX16	64089	NM_152836	1	1	1	0	1	4
hsa-let-7c-5p	MIMAT0000064	SNX30	401548	NM_001012994	1	1	0	1	1	4
hsa-let-7c-5p	MIMAT0000064	SNX6	58533	XM_005267957	1	1	0	1	1	4
hsa-let-7c-5p	MIMAT0000064	SOCS4	122809	NM_080867	1	1	1	0	1	4
hsa-let-7c-5p	MIMAT0000064	SOGA3	387104	NM_001012279	1	1	0	1	1	4
hsa-let-7c-5p	MIMAT0000064	SOWAHA	134548	NM_175873	0	1	1	1	1	4
hsa-let-7c-5p	MIMAT0000064	SOX12	6666	NM_006943	1	1	0	1	1	4
hsa-let-7c-5p	MIMAT0000064	SPRYD7	57213	NM_001127482	1	1	1	0	1	4
hsa-let-7c-5p	MIMAT0000064	SREBF2	6721	NM_004599	1	1	0	1	1	4
hsa-let-7c-5p	MIMAT0000064	SRGAP1	57522	XM_005269042	1	1	0	1	1	4
hsa-let-7c-5p	MIMAT0000064	SRGAP3	9901	NM_014850	1	1	0	1	1	4
hsa-let-7c-5p	MIMAT0000064	ST7L	54879	NM_017744	1	1	0	1	1	4
hsa-let-7c-5p	MIMAT0000064	STAMBP	10617	NM_213622	1	1	0	1	1	4
hsa-let-7c-5p	MIMAT0000064	STAT3	6774	XM_005257614	1	1	0	1	1	4
hsa-let-7c-5p	MIMAT0000064	STEAP3	55240	NM_182915	1	1	0	1	1	4
hsa-let-7c-5p	MIMAT0000064	STK40	83931	NM_032017	0	1	1	1	1	4
hsa-let-7c-5p	MIMAT0000064	STS	412	XM_005274512	1	1	0	1	1	4
hsa-let-7c-5p	MIMAT0000064	STX1A	6804	NM_004603	1	1	0	1	1	4
hsa-let-7c-5p	MIMAT0000064	STX3	6809	NM_004177	1	1	0	1	1	4
hsa-let-7c-5p	MIMAT0000064	SUB1	10923	XM_005248232	1	1	0	1	1	4
hsa-let-7c-5p	MIMAT0000064	SUB1	10923	NM_006713	1	1	1	0	1	4
hsa-let-7c-5p	MIMAT0000064	SUOX	6821	NM_000456	1	1	0	1	1	4
hsa-let-7c-5p	MIMAT0000064	SYNC	81493	NM_001161708	1	1	1	0	1	4
hsa-let-7c-5p	MIMAT0000064	SYNCRIP	10492	NM_001159677	1	1	0	1	1	4
hsa-let-7c-5p	MIMAT0000064	SYNPO2L	79933	NM_001114133	1	1	0	1	1	4
hsa-let-7c-5p	MIMAT0000064	SYT11	23208	NM_152280	1	1	0	1	1	4
hsa-let-7c-5p	MIMAT0000064	TAF9B	51616	XM_005262142	1	1	0	1	1	4
hsa-let-7c-5p	MIMAT0000064	TAF9B	51616	XM_005277806	1	1	0	1	1	4
hsa-let-7c-5p	MIMAT0000064	TARBP2	6895	XM_005269120	1	1	0	1	1	4
hsa-let-7c-5p	MIMAT0000064	TAZ	6901	NM_000116	1	1	0	1	1	4
hsa-let-7c-5p	MIMAT0000064	TBC1D12	23232	NM_015188	1	1	0	1	1	4
hsa-let-7c-5p	MIMAT0000064	TBKBP1	9755	XM_005257860	1	1	0	1	1	4
hsa-let-7c-5p	MIMAT0000064	TEAD3	7005	XM_005249342	1	1	0	1	1	4
hsa-let-7c-5p	MIMAT0000064	TEX261	113419	NM_144582	1	1	0	1	1	4
hsa-let-7c-5p	MIMAT0000064	TFDP2	7029	NM_001178138	1	1	0	1	1	4
hsa-let-7c-5p	MIMAT0000064	TFEC	22797	XM_005250231	1	1	0	1	1	4
hsa-let-7c-5p	MIMAT0000064	TGFBR1	7046	NM_001130916	1	1	1	0	1	4
hsa-let-7c-5p	MIMAT0000064	TGFBR3	7049	NM_001195684	1	1	1	0	1	4
hsa-let-7c-5p	MIMAT0000064	TGFBR3	7049	NM_001195683	1	1	1	0	1	4
hsa-let-7c-5p	MIMAT0000064	TIA1	7072	XM_005264529	1	1	0	1	1	4
hsa-let-7c-5p	MIMAT0000064	TK1	7083	XM_005257631	1	1	0	1	1	4
hsa-let-7c-5p	MIMAT0000064	TK2	7084	NM_001271934	1	1	0	1	1	4
hsa-let-7c-5p	MIMAT0000064	TMEM144	55314	NM_018342	1	1	0	1	1	4
hsa-let-7c-5p	MIMAT0000064	TMEM192	201931	NM_001100389	1	1	0	1	1	4
hsa-let-7c-5p	MIMAT0000064	TMEM194A	23306	NM_001130963	1	1	0	1	1	4
hsa-let-7c-5p	MIMAT0000064	TMEM2	23670	NM_001135820	1	1	1	0	1	4
hsa-let-7c-5p	MIMAT0000064	TMEM220	388335	NM_001004313	1	1	0	1	1	4
hsa-let-7c-5p	MIMAT0000064	TMEM234	56063	XM_005271044	1	1	0	1	1	4
hsa-let-7c-5p	MIMAT0000064	TMOD2	29767	NM_014548	1	1	0	1	1	4
hsa-let-7c-5p	MIMAT0000064	TMPPE	643853	NM_001039770	1	1	0	1	1	4
hsa-let-7c-5p	MIMAT0000064	TMPRSS2	7113	XM_005261041	1	1	0	1	1	4
hsa-let-7c-5p	MIMAT0000064	TNFAIP3	7128	NM_001270508	1	1	0	1	1	4
hsa-let-7c-5p	MIMAT0000064	TNFRSF1B	7133	NM_001066	1	1	0	1	1	4
hsa-let-7c-5p	MIMAT0000064	TNFSF9	8744	NM_003811	1	1	0	1	1	4
hsa-let-7c-5p	MIMAT0000064	TNKS	8658	XM_005272399	1	1	0	1	1	4
hsa-let-7c-5p	MIMAT0000064	TNNI1	7135	NM_003281	1	1	0	1	1	4
hsa-let-7c-5p	MIMAT0000064	TOR1AIP2	163590	NM_001199260	1	1	0	1	1	4
hsa-let-7c-5p	MIMAT0000064	TP53	7157	NM_001126114	1	1	0	1	1	4
hsa-let-7c-5p	MIMAT0000064	TP53	7157	NM_001276696	1	1	0	1	1	4
hsa-let-7c-5p	MIMAT0000064	TP53INP2	58476	NM_021202	1	1	0	1	1	4
hsa-let-7c-5p	MIMAT0000064	TPP1	1200	NM_000391	1	1	0	1	1	4
hsa-let-7c-5p	MIMAT0000064	TRABD	80305	XM_005261938	1	1	0	1	1	4
hsa-let-7c-5p	MIMAT0000064	TRANK1	9881	NM_014831	1	1	0	1	1	4
hsa-let-7c-5p	MIMAT0000064	TRAPPC1	58485	NM_021210	1	1	0	1	1	4
hsa-let-7c-5p	MIMAT0000064	TRAPPC10	7109	NM_003274	1	1	0	1	1	4
hsa-let-7c-5p	MIMAT0000064	TRIM13	10206	NM_213590	1	1	0	1	1	4
hsa-let-7c-5p	MIMAT0000064	TRIM32	22954	XM_005251814	1	1	0	1	1	4
hsa-let-7c-5p	MIMAT0000064	TRIM65	201292	NM_173547	1	1	0	1	1	4
hsa-let-7c-5p	MIMAT0000064	TRIM67	440730	NM_001004342	1	1	0	1	1	4
hsa-let-7c-5p	MIMAT0000064	TRMT10A	93587	NM_001134666	1	1	1	0	1	4
hsa-let-7c-5p	MIMAT0000064	TRMT10A	93587	NM_001134665	1	1	1	0	1	4
hsa-let-7c-5p	MIMAT0000064	TRMT13	54482	NM_019083	1	1	0	1	1	4
hsa-let-7c-5p	MIMAT0000064	TSC1	7248	XM_005272211	1	1	0	1	1	4
hsa-let-7c-5p	MIMAT0000064	TSEN34	79042	NM_024075	1	1	1	0	1	4
hsa-let-7c-5p	MIMAT0000064	TSEN34	79042	NM_001077446	1	1	1	0	1	4
hsa-let-7c-5p	MIMAT0000064	TSPAN18	90139	XM_005253217	1	1	0	1	1	4
hsa-let-7c-5p	MIMAT0000064	TSPYL5	85453	NM_033512	1	1	0	1	1	4
hsa-let-7c-5p	MIMAT0000064	TTC14	151613	NM_001042601	1	1	0	1	1	4
hsa-let-7c-5p	MIMAT0000064	TTL	150465	NM_153712	1	1	0	1	1	4
hsa-let-7c-5p	MIMAT0000064	TXLNG	55787	NM_018360	0	1	1	1	1	4
hsa-let-7c-5p	MIMAT0000064	UBE2G2	7327	NM_182688	1	1	0	1	1	4
hsa-let-7c-5p	MIMAT0000064	UBN2	254048	XM_005250248	1	1	0	1	1	4
hsa-let-7c-5p	MIMAT0000064	UFL1	23376	NM_015323	0	1	1	1	1	4
hsa-let-7c-5p	MIMAT0000064	UFM1	51569	XM_005266418	1	1	0	1	1	4
hsa-let-7c-5p	MIMAT0000064	USB1	79650	NM_001204911	1	1	0	1	1	4
hsa-let-7c-5p	MIMAT0000064	USP12	219333	NM_182488	1	1	0	1	1	4
hsa-let-7c-5p	MIMAT0000064	USP15	9958	NM_001252078	1	1	0	1	1	4
hsa-let-7c-5p	MIMAT0000064	UTRN	7402	XM_005267129	1	1	0	1	1	4
hsa-let-7c-5p	MIMAT0000064	UTRN	7402	NM_007124	1	1	1	0	1	4
hsa-let-7c-5p	MIMAT0000064	UTY	7404	NM_001258249	1	1	0	1	1	4
hsa-let-7c-5p	MIMAT0000064	VANGL2	57216	NM_020335	1	1	0	1	1	4
hsa-let-7c-5p	MIMAT0000064	VCL	7414	NM_014000	1	1	0	1	1	4
hsa-let-7c-5p	MIMAT0000064	VPS26B	112936	NM_052875	0	1	1	1	1	4
hsa-let-7c-5p	MIMAT0000064	WARS2	10352	XM_005270350	1	1	0	1	1	4
hsa-let-7c-5p	MIMAT0000064	WDR37	22884	XM_005252417	1	1	0	1	1	4
hsa-let-7c-5p	MIMAT0000064	WDR73	84942	NM_032856	0	1	1	1	1	4
hsa-let-7c-5p	MIMAT0000064	WIPI2	26100	NM_001278299	1	1	0	1	1	4
hsa-let-7c-5p	MIMAT0000064	XG	7499	XM_005274587	1	1	0	1	1	4
hsa-let-7c-5p	MIMAT0000064	XK	7504	NM_021083	1	1	0	1	1	4
hsa-let-7c-5p	MIMAT0000064	XKR8	55113	NM_018053	1	1	0	1	1	4
hsa-let-7c-5p	MIMAT0000064	XYLT1	64131	NM_022166	1	1	0	1	1	4
hsa-let-7c-5p	MIMAT0000064	YOD1	55432	NM_001276320	1	1	0	1	1	4
hsa-let-7c-5p	MIMAT0000064	YOD1	55432	NM_018566	1	1	1	0	1	4
hsa-let-7c-5p	MIMAT0000064	ZBP1	81030	NM_001160419	1	1	1	0	1	4
hsa-let-7c-5p	MIMAT0000064	ZBTB10	65986	NM_001105539	1	1	0	1	1	4
hsa-let-7c-5p	MIMAT0000064	ZBTB39	9880	NM_014830	1	1	0	1	1	4
hsa-let-7c-5p	MIMAT0000064	ZC3H3	23144	XM_005250846	1	1	0	1	1	4
hsa-let-7c-5p	MIMAT0000064	ZC3H3	23144	XM_005250847	1	1	0	1	1	4
hsa-let-7c-5p	MIMAT0000064	ZCCHC9	84240	NM_001131036	1	1	1	0	1	4
hsa-let-7c-5p	MIMAT0000064	ZCCHC9	84240	NM_001131035	1	1	1	0	1	4
hsa-let-7c-5p	MIMAT0000064	ZFAND5	7763	NM_001102420	1	1	0	1	1	4
hsa-let-7c-5p	MIMAT0000064	ZFYVE26	23503	NM_015346	0	1	1	1	1	4
hsa-let-7c-5p	MIMAT0000064	ZNF10	7556	NM_015394	1	1	0	1	1	4
hsa-let-7c-5p	MIMAT0000064	ZNF197	10168	XM_005264783	1	1	0	1	1	4
hsa-let-7c-5p	MIMAT0000064	ZNF200	7752	NM_003454	1	1	0	1	1	4
hsa-let-7c-5p	MIMAT0000064	ZNF202	7753	XM_005271660	1	1	0	1	1	4
hsa-let-7c-5p	MIMAT0000064	ZNF215	7762	NM_013250	1	1	0	1	1	4
hsa-let-7c-5p	MIMAT0000064	ZNF24	7572	NM_006965	1	1	0	1	1	4
hsa-let-7c-5p	MIMAT0000064	ZNF248	57209	NM_021045	1	1	0	1	1	4
hsa-let-7c-5p	MIMAT0000064	ZNF268	10795	NM_152943	1	1	0	1	1	4
hsa-let-7c-5p	MIMAT0000064	ZNF28	7576	NM_006969	1	1	0	1	1	4
hsa-let-7c-5p	MIMAT0000064	ZNF280B	140883	NM_080764	1	1	0	1	1	4
hsa-let-7c-5p	MIMAT0000064	ZNF322	79692	NM_001242797	1	1	1	0	1	4
hsa-let-7c-5p	MIMAT0000064	ZNF322	79692	NM_001242799	1	1	1	0	1	4
hsa-let-7c-5p	MIMAT0000064	ZNF322	79692	NM_001242798	1	1	1	0	1	4
hsa-let-7c-5p	MIMAT0000064	ZNF322	79692	NM_024639	1	1	1	0	1	4
hsa-let-7c-5p	MIMAT0000064	ZNF341	84905	XM_005260584	1	1	0	1	1	4
hsa-let-7c-5p	MIMAT0000064	ZNF341	84905	NM_032819	1	1	1	0	1	4
hsa-let-7c-5p	MIMAT0000064	ZNF343	79175	NM_024325	1	1	0	1	1	4
hsa-let-7c-5p	MIMAT0000064	ZNF347	84671	XM_005259335	1	1	0	1	1	4
hsa-let-7c-5p	MIMAT0000064	ZNF354A	6940	NM_005649	1	1	0	1	1	4
hsa-let-7c-5p	MIMAT0000064	ZNF473	25888	XM_005258717	1	1	0	1	1	4
hsa-let-7c-5p	MIMAT0000064	ZNF555	148254	NM_152791	1	1	0	1	1	4
hsa-let-7c-5p	MIMAT0000064	ZNF557	79230	NM_024341	1	1	0	1	1	4
hsa-let-7c-5p	MIMAT0000064	ZNF566	84924	NM_001145345	1	1	0	1	1	4
hsa-let-7c-5p	MIMAT0000064	ZNF583	147949	NM_001159860	1	1	1	0	1	4
hsa-let-7c-5p	MIMAT0000064	ZNF583	147949	NM_001159861	1	1	1	0	1	4
hsa-let-7c-5p	MIMAT0000064	ZNF587	84914	NM_032828	1	1	0	1	1	4
hsa-let-7c-5p	MIMAT0000064	ZNF605	100289635	NM_183238	1	1	0	1	1	4
hsa-let-7c-5p	MIMAT0000064	ZNF623	9831	NM_001082480	1	1	0	1	1	4
hsa-let-7c-5p	MIMAT0000064	ZNF644	84146	XM_005271258	1	1	0	1	1	4
hsa-let-7c-5p	MIMAT0000064	ZNF662	389114	NM_207404	1	1	0	1	1	4
hsa-let-7c-5p	MIMAT0000064	ZNF70	7621	NM_021916	1	1	0	1	1	4
hsa-let-7c-5p	MIMAT0000064	ZNF783	100289678	NM_001195220	1	1	0	1	1	4
hsa-let-7c-5p	MIMAT0000064	ZNF784	147808	NM_203374	1	1	0	1	1	4
hsa-let-7c-5p	MIMAT0000064	ZNF79	7633	XM_005252190	1	1	0	1	1	4
hsa-let-7c-5p	MIMAT0000064	ZNF792	126375	XM_005258519	1	1	0	1	1	4
hsa-let-7c-5p	MIMAT0000064	ZNF835	90485	XM_005259382	1	1	0	1	1	4
hsa-let-7c-5p	MIMAT0000064	ZSWIM5	57643	NM_020883	1	1	0	1	1	4
hsa-miR-145-5p	MIMAT0000437	ABCE1	6059	NM_002940	1	1	1	0	1	4
hsa-miR-145-5p	MIMAT0000437	ABCE1	6059	NM_001040876	1	1	1	0	1	4
hsa-miR-145-5p	MIMAT0000437	ABHD17B	51104	NM_001025780	1	1	1	0	1	4
hsa-miR-145-5p	MIMAT0000437	ABHD2	11057	NM_007011	1	1	0	1	1	4
hsa-miR-145-5p	MIMAT0000437	ACADSB	36	NM_001609	1	1	0	1	1	4
hsa-miR-145-5p	MIMAT0000437	ACBD3	64746	NM_022735	0	1	1	1	1	4
hsa-miR-145-5p	MIMAT0000437	ACBD5	91452	NM_001271512	1	1	0	1	1	4
hsa-miR-145-5p	MIMAT0000437	ACP2	53	NM_001610	1	1	0	1	1	4
hsa-miR-145-5p	MIMAT0000437	ACPL2	92370	NM_001037172	1	1	1	0	1	4
hsa-miR-145-5p	MIMAT0000437	ACPL2	92370	NM_152282	1	1	1	0	1	4
hsa-miR-145-5p	MIMAT0000437	ACSBG2	81616	XM_005259652	1	1	0	1	1	4
hsa-miR-145-5p	MIMAT0000437	ACSL4	2182	NM_022977	0	1	1	1	1	4
hsa-miR-145-5p	MIMAT0000437	ACTB	60	NM_001101	1	1	1	0	1	4
hsa-miR-145-5p	MIMAT0000437	ACTG1	71	NM_001199954	1	1	1	0	1	4
hsa-miR-145-5p	MIMAT0000437	ACTG1	71	NM_001614	1	1	1	0	1	4
hsa-miR-145-5p	MIMAT0000437	ACVR1B	91	NM_020328	1	1	0	1	1	4
hsa-miR-145-5p	MIMAT0000437	ACVR2A	92	NM_001278579	1	1	0	1	1	4
hsa-miR-145-5p	MIMAT0000437	ADAM11	4185	XM_005257373	1	1	0	1	1	4
hsa-miR-145-5p	MIMAT0000437	ADAM17	6868	NM_003183	0	1	1	1	1	4
hsa-miR-145-5p	MIMAT0000437	ADAM28	10863	NM_014265	1	1	0	1	1	4
hsa-miR-145-5p	MIMAT0000437	ADAMTS5	11096	NM_007038	1	1	1	0	1	4
hsa-miR-145-5p	MIMAT0000437	ADCY1	107	NM_021116	1	1	0	1	1	4
hsa-miR-145-5p	MIMAT0000437	ADD3	120	NM_019903	1	1	1	0	1	4
hsa-miR-145-5p	MIMAT0000437	ADD3	120	NM_001121	1	1	1	0	1	4
hsa-miR-145-5p	MIMAT0000437	ADD3	120	NM_016824	1	1	1	0	1	4
hsa-miR-145-5p	MIMAT0000437	ADH6	130	XM_005262731	1	1	0	1	1	4
hsa-miR-145-5p	MIMAT0000437	ADPGK	83440	NM_031284	0	1	1	1	1	4
hsa-miR-145-5p	MIMAT0000437	ADRA1A	148	NM_033304	1	1	1	0	1	4
hsa-miR-145-5p	MIMAT0000437	ADRB3	155	NM_000025	1	1	1	0	1	4
hsa-miR-145-5p	MIMAT0000437	AGMAT	79814	NM_024758	1	1	1	0	1	4
hsa-miR-145-5p	MIMAT0000437	AGPAT4	56895	NM_020133	1	1	0	1	1	4
hsa-miR-145-5p	MIMAT0000437	AGPAT6	137964	XM_005273402	1	1	0	1	1	4
hsa-miR-145-5p	MIMAT0000437	AKAP12	9590	XM_005267234	1	1	0	1	1	4
hsa-miR-145-5p	MIMAT0000437	AKAP12	9590	NM_144497	1	1	1	0	1	4
hsa-miR-145-5p	MIMAT0000437	AKAP12	9590	NM_005100	1	1	1	0	1	4
hsa-miR-145-5p	MIMAT0000437	AKR1D1	6718	NM_005989	1	1	1	0	1	4
hsa-miR-145-5p	MIMAT0000437	AKR1D1	6718	NM_001190906	1	1	1	0	1	4
hsa-miR-145-5p	MIMAT0000437	AKR1D1	6718	NM_001190907	1	1	1	0	1	4
hsa-miR-145-5p	MIMAT0000437	ALDH5A1	7915	NM_170740	1	1	0	1	1	4
hsa-miR-145-5p	MIMAT0000437	ALPK3	57538	NM_020778	1	1	0	1	1	4
hsa-miR-145-5p	MIMAT0000437	ALS2CL	259173	NM_001190707	1	1	0	1	1	4
hsa-miR-145-5p	MIMAT0000437	AMBRA1	55626	XM_005253010	1	1	0	1	1	4
hsa-miR-145-5p	MIMAT0000437	AMOTL1	154810	XM_005273798	1	1	0	1	1	4
hsa-miR-145-5p	MIMAT0000437	AMTN	401138	NM_212557	1	1	1	0	1	4
hsa-miR-145-5p	MIMAT0000437	ANGPT2	285	NM_001118888	1	1	1	0	1	4
hsa-miR-145-5p	MIMAT0000437	ANGPT2	285	NM_001118887	1	1	1	0	1	4
hsa-miR-145-5p	MIMAT0000437	ANKFY1	51479	NM_001257999	1	1	0	1	1	4
hsa-miR-145-5p	MIMAT0000437	ANKFY1	51479	NM_016376	1	1	1	0	1	4
hsa-miR-145-5p	MIMAT0000437	ANKRD12	23253	NM_001204056	1	1	0	1	1	4
hsa-miR-145-5p	MIMAT0000437	ANKRD28	23243	NM_001195098	0	1	1	1	1	4
hsa-miR-145-5p	MIMAT0000437	ANKRD33B	651746	NM_001164440	1	1	1	0	1	4
hsa-miR-145-5p	MIMAT0000437	ANKRD52	283373	NM_173595	1	1	0	1	1	4
hsa-miR-145-5p	MIMAT0000437	ANKRD6	22881	NM_001242811	1	1	0	1	1	4
hsa-miR-145-5p	MIMAT0000437	AP1G1	164	XM_005255823	1	1	0	1	1	4
hsa-miR-145-5p	MIMAT0000437	AP1G1	164	NM_001128	1	1	1	0	1	4
hsa-miR-145-5p	MIMAT0000437	AP1G1	164	NM_001030007	1	1	1	0	1	4
hsa-miR-145-5p	MIMAT0000437	AP2B1	163	XM_005257940	1	1	0	1	1	4
hsa-miR-145-5p	MIMAT0000437	AP2B1	163	NM_001282	1	1	1	0	1	4
hsa-miR-145-5p	MIMAT0000437	AP2B1	163	NM_001030006	1	1	1	0	1	4
hsa-miR-145-5p	MIMAT0000437	AP3M2	10947	NM_001134296	1	1	0	1	1	4
hsa-miR-145-5p	MIMAT0000437	AP3S1	1176	NM_001284	1	1	1	0	1	4
hsa-miR-145-5p	MIMAT0000437	AP3S2	10239	NM_005829	1	1	0	1	1	4
hsa-miR-145-5p	MIMAT0000437	APH1B	83464	NM_031301	1	1	0	1	1	4
hsa-miR-145-5p	MIMAT0000437	APLF	200558	NM_173545	1	1	0	1	1	4
hsa-miR-145-5p	MIMAT0000437	APPBP2	10513	NM_006380	1	1	0	1	1	4
hsa-miR-145-5p	MIMAT0000437	APPL1	26060	NM_012096	0	1	1	1	1	4
hsa-miR-145-5p	MIMAT0000437	ARAP2	116984	XM_005262638	1	1	0	1	1	4
hsa-miR-145-5p	MIMAT0000437	AREL1	9870	XM_005268243	1	1	0	1	1	4
hsa-miR-145-5p	MIMAT0000437	ARF6	382	NM_001663	1	1	1	0	1	4
hsa-miR-145-5p	MIMAT0000437	ARHGAP24	83478	NM_001025616	0	1	1	1	1	4
hsa-miR-145-5p	MIMAT0000437	ARHGAP26	23092	XM_005268398	1	1	0	1	1	4
hsa-miR-145-5p	MIMAT0000437	ARHGAP28	79822	XM_005258144	1	1	0	1	1	4
hsa-miR-145-5p	MIMAT0000437	ARHGAP40	343578	NM_001164431	1	1	0	1	1	4
hsa-miR-145-5p	MIMAT0000437	ARHGAP44	9912	NM_014859	1	1	0	1	1	4
hsa-miR-145-5p	MIMAT0000437	ARHGEF12	23365	NM_015313	1	1	0	1	1	4
hsa-miR-145-5p	MIMAT0000437	ARHGEF38	54848	NM_001242729	1	1	0	1	1	4
hsa-miR-145-5p	MIMAT0000437	ARIH1	25820	NM_005744	1	1	0	1	1	4
hsa-miR-145-5p	MIMAT0000437	ARL13B	200894	NM_001174150	1	1	1	0	1	4
hsa-miR-145-5p	MIMAT0000437	ARL13B	200894	NM_144996	1	1	1	0	1	4
hsa-miR-145-5p	MIMAT0000437	ARL13B	200894	NM_182896	1	1	1	0	1	4
hsa-miR-145-5p	MIMAT0000437	ARL13B	200894	NM_001174151	1	1	1	0	1	4
hsa-miR-145-5p	MIMAT0000437	ARL6IP5	10550	NM_006407	0	1	1	1	1	4
hsa-miR-145-5p	MIMAT0000437	ARMC7	79637	NM_024585	1	1	0	1	1	4
hsa-miR-145-5p	MIMAT0000437	ARMCX3	51566	XM_005262141	1	1	0	1	1	4
hsa-miR-145-5p	MIMAT0000437	ARMCX3	51566	XM_005278107	1	1	0	1	1	4
hsa-miR-145-5p	MIMAT0000437	ARMCX3	51566	NM_177948	1	1	1	0	1	4
hsa-miR-145-5p	MIMAT0000437	ARMCX3	51566	NM_177947	1	1	1	0	1	4
hsa-miR-145-5p	MIMAT0000437	ARMCX3	51566	NM_016607	1	1	1	0	1	4
hsa-miR-145-5p	MIMAT0000437	ARNT2	9915	XM_005254811	1	1	0	1	1	4
hsa-miR-145-5p	MIMAT0000437	ARNT2	9915	NM_014862	1	1	1	0	1	4
hsa-miR-145-5p	MIMAT0000437	ASB11	140456	NM_080873	0	1	1	1	1	4
hsa-miR-145-5p	MIMAT0000437	ASPHD2	57168	NM_020437	1	1	1	0	1	4
hsa-miR-145-5p	MIMAT0000437	ATAD2B	54454	XM_005264372	1	1	0	1	1	4
hsa-miR-145-5p	MIMAT0000437	ATF1	466	NM_005171	1	1	0	1	1	4
hsa-miR-145-5p	MIMAT0000437	ATF6	22926	NM_007348	1	1	0	1	1	4
hsa-miR-145-5p	MIMAT0000437	ATG2B	55102	NM_018036	1	1	0	1	1	4
hsa-miR-145-5p	MIMAT0000437	ATP13A2	23400	NM_022089	1	1	0	1	1	4
hsa-miR-145-5p	MIMAT0000437	ATP1B4	23439	NM_012069	1	1	1	0	1	4
hsa-miR-145-5p	MIMAT0000437	ATP2B1	490	XM_005268919	1	1	0	1	1	4
hsa-miR-145-5p	MIMAT0000437	ATP8A1	10396	XM_005248043	1	1	0	1	1	4
hsa-miR-145-5p	MIMAT0000437	ATP8A1	10396	NM_001105529	1	1	1	0	1	4
hsa-miR-145-5p	MIMAT0000437	ATP8B4	79895	NM_024837	1	1	1	0	1	4
hsa-miR-145-5p	MIMAT0000437	ATXN1	6310	NM_000332	1	1	0	1	1	4
hsa-miR-145-5p	MIMAT0000437	ATXN2	6311	XM_005253925	1	1	0	1	1	4
hsa-miR-145-5p	MIMAT0000437	ATXN2	6311	NM_002973	1	1	1	0	1	4
hsa-miR-145-5p	MIMAT0000437	ATXN7	6314	NM_000333	1	1	0	1	1	4
hsa-miR-145-5p	MIMAT0000437	ATXN7L1	222255	NM_138495	1	1	1	0	1	4
hsa-miR-145-5p	MIMAT0000437	ATXN7L1	222255	NM_020725	1	1	1	0	1	4
hsa-miR-145-5p	MIMAT0000437	ATXN7L3	56970	XM_005257526	1	1	0	1	1	4
hsa-miR-145-5p	MIMAT0000437	AWAT2	158835	NM_001002254	0	1	1	1	1	4
hsa-miR-145-5p	MIMAT0000437	B3GALTL	145173	NM_194318	1	1	1	0	1	4
hsa-miR-145-5p	MIMAT0000437	B4GALNT2	124872	NM_153446	1	1	0	1	1	4
hsa-miR-145-5p	MIMAT0000437	BACE1	23621	NM_012104	1	1	0	1	1	4
hsa-miR-145-5p	MIMAT0000437	BACE2	25825	NM_012105	1	1	0	1	1	4
hsa-miR-145-5p	MIMAT0000437	BACH2	60468	NM_001170794	1	1	1	0	1	4
hsa-miR-145-5p	MIMAT0000437	BAG4	9530	NM_001204878	1	1	1	0	1	4
hsa-miR-145-5p	MIMAT0000437	BCAT1	586	NM_001178093	1	1	1	0	1	4
hsa-miR-145-5p	MIMAT0000437	BCAT1	586	NM_001178092	1	1	1	0	1	4
hsa-miR-145-5p	MIMAT0000437	BCAT1	586	NM_001178091	1	1	1	0	1	4
hsa-miR-145-5p	MIMAT0000437	BCAT1	586	NM_001178094	1	1	1	0	1	4
hsa-miR-145-5p	MIMAT0000437	BCL11B	64919	NM_138576	1	1	0	1	1	4
hsa-miR-145-5p	MIMAT0000437	BCLAF1	9774	XM_005267237	1	1	0	1	1	4
hsa-miR-145-5p	MIMAT0000437	BCR	613	NM_021574	1	1	1	0	1	4
hsa-miR-145-5p	MIMAT0000437	BDKRB2	624	XM_005267980	1	1	0	1	1	4
hsa-miR-145-5p	MIMAT0000437	BLCAP	10904	NM_001167820	1	1	0	1	1	4
hsa-miR-145-5p	MIMAT0000437	BLOC1S6	26258	NM_012388	1	1	1	0	1	4
hsa-miR-145-5p	MIMAT0000437	BMP1	649	NM_006129	1	1	0	1	1	4
hsa-miR-145-5p	MIMAT0000437	BMP3	651	NM_001201	1	1	0	1	1	4
hsa-miR-145-5p	MIMAT0000437	BNIP3	664	NM_004052	1	1	1	0	1	4
hsa-miR-145-5p	MIMAT0000437	BTBD11	121551	NM_001018072	1	1	0	1	1	4
hsa-miR-145-5p	MIMAT0000437	BTG2	7832	NM_006763	1	1	0	1	1	4
hsa-miR-145-5p	MIMAT0000437	BZW1	9689	NM_001207067	1	1	1	0	1	4
hsa-miR-145-5p	MIMAT0000437	BZW1	9689	NM_001207069	1	1	1	0	1	4
hsa-miR-145-5p	MIMAT0000437	BZW1	9689	NM_014670	1	1	1	0	1	4
hsa-miR-145-5p	MIMAT0000437	C11orf58	10944	NM_014267	1	1	1	0	1	4
hsa-miR-145-5p	MIMAT0000437	C13orf35	400165	NM_207440	1	1	1	0	1	4
hsa-miR-145-5p	MIMAT0000437	C16orf59	80178	NM_025108	1	1	0	1	1	4
hsa-miR-145-5p	MIMAT0000437	C17orf102	400591	NM_207454	1	1	0	1	1	4
hsa-miR-145-5p	MIMAT0000437	C17orf104	284071	NM_001145080	1	1	0	1	1	4
hsa-miR-145-5p	MIMAT0000437	C1orf106	55765	NM_001142569	1	1	0	1	1	4
hsa-miR-145-5p	MIMAT0000437	C1orf56	54964	NM_017860	1	1	1	0	1	4
hsa-miR-145-5p	MIMAT0000437	C1QTNF7	114905	NM_031911	1	1	1	0	1	4
hsa-miR-145-5p	MIMAT0000437	C1QTNF7	114905	NM_001135171	1	1	1	0	1	4
hsa-miR-145-5p	MIMAT0000437	C22orf46	79640	NM_001142964	1	1	0	1	1	4
hsa-miR-145-5p	MIMAT0000437	C6orf201	404220	NM_001085401	1	1	0	1	1	4
hsa-miR-145-5p	MIMAT0000437	C7orf41	222166	NM_152793	1	1	0	1	1	4
hsa-miR-145-5p	MIMAT0000437	C7orf55	154791	NM_197964	1	1	0	1	1	4
hsa-miR-145-5p	MIMAT0000437	C8A	731	NM_000562	1	1	0	1	1	4
hsa-miR-145-5p	MIMAT0000437	C9orf170	401535	NM_001001709	1	1	0	1	1	4
hsa-miR-145-5p	MIMAT0000437	CABP4	57010	NM_145200	1	1	1	0	1	4
hsa-miR-145-5p	MIMAT0000437	CACNA1D	776	XM_005265448	1	1	0	1	1	4
hsa-miR-145-5p	MIMAT0000437	CACNA1D	776	NM_001128839	1	1	1	0	1	4
hsa-miR-145-5p	MIMAT0000437	CACNA1D	776	NM_001128840	1	1	1	0	1	4
hsa-miR-145-5p	MIMAT0000437	CACNA1D	776	NM_000720	1	1	1	0	1	4
hsa-miR-145-5p	MIMAT0000437	CACNA2D1	781	XM_005250569	1	1	0	1	1	4
hsa-miR-145-5p	MIMAT0000437	CADM2	253559	NM_001167674	1	1	0	1	1	4
hsa-miR-145-5p	MIMAT0000437	CAMK2B	816	NM_001220	1	1	0	1	1	4
hsa-miR-145-5p	MIMAT0000437	CAMSAP2	23271	NM_203459	1	1	1	0	1	4
hsa-miR-145-5p	MIMAT0000437	CAND2	23066	NM_001162499	1	1	0	1	1	4
hsa-miR-145-5p	MIMAT0000437	CAPZB	832	NM_001206540	1	1	1	0	1	4
hsa-miR-145-5p	MIMAT0000437	CAPZB	832	NM_004930	1	1	1	0	1	4
hsa-miR-145-5p	MIMAT0000437	CARF	79800	NM_001104586	1	1	1	0	1	4
hsa-miR-145-5p	MIMAT0000437	CASP14	23581	NM_012114	1	1	1	0	1	4
hsa-miR-145-5p	MIMAT0000437	CASP2	835	NM_032983	1	1	1	0	1	4
hsa-miR-145-5p	MIMAT0000437	CASZ1	54897	NM_001079843	1	1	0	1	1	4
hsa-miR-145-5p	MIMAT0000437	CAV2	858	NM_001206747	1	1	0	1	1	4
hsa-miR-145-5p	MIMAT0000437	CAV2	858	NM_001233	1	1	0	1	1	4
hsa-miR-145-5p	MIMAT0000437	CBFB	865	NM_001755	1	1	1	0	1	4
hsa-miR-145-5p	MIMAT0000437	CBFB	865	NM_022845	1	1	1	0	1	4
hsa-miR-145-5p	MIMAT0000437	CBL	867	NM_005188	1	1	0	1	1	4
hsa-miR-145-5p	MIMAT0000437	CBLN2	147381	NM_182511	1	1	0	1	1	4
hsa-miR-145-5p	MIMAT0000437	CC2D1B	200014	NM_032449	1	1	0	1	1	4
hsa-miR-145-5p	MIMAT0000437	CCDC107	203260	NM_001195217	1	1	1	0	1	4
hsa-miR-145-5p	MIMAT0000437	CCDC25	55246	NM_018246	1	1	0	1	1	4
hsa-miR-145-5p	MIMAT0000437	CCDC39	339829	NM_181426	1	1	1	0	1	4
hsa-miR-145-5p	MIMAT0000437	CCDC62	84660	NM_201435	1	1	1	0	1	4
hsa-miR-145-5p	MIMAT0000437	CCDC88B	283234	NM_032251	1	1	0	1	1	4
hsa-miR-145-5p	MIMAT0000437	CCDC93	54520	NM_019044	1	1	0	1	1	4
hsa-miR-145-5p	MIMAT0000437	CCER1	196477	NM_152638	1	1	0	1	1	4
hsa-miR-145-5p	MIMAT0000437	CCL25	6370	XM_005272492	1	1	0	1	1	4
hsa-miR-145-5p	MIMAT0000437	CCNJL	79616	NM_024565	1	1	0	1	1	4
hsa-miR-145-5p	MIMAT0000437	CD1D	912	NM_001766	1	1	1	0	1	4
hsa-miR-145-5p	MIMAT0000437	CD44	960	NM_000610	1	1	0	1	1	4
hsa-miR-145-5p	MIMAT0000437	CD53	963	NM_000560	1	1	1	0	1	4
hsa-miR-145-5p	MIMAT0000437	CD6	923	NM_006725	1	1	0	1	1	4
hsa-miR-145-5p	MIMAT0000437	CD72	971	NM_001782	1	1	0	1	1	4
hsa-miR-145-5p	MIMAT0000437	CDC14B	8555	NM_033331	1	1	0	1	1	4
hsa-miR-145-5p	MIMAT0000437	CDC37L1	55664	NM_017913	1	1	1	0	1	4
hsa-miR-145-5p	MIMAT0000437	CDCA3	83461	XM_005253795	1	1	0	1	1	4
hsa-miR-145-5p	MIMAT0000437	CDCA3	83461	XM_005277758	1	1	0	1	1	4
hsa-miR-145-5p	MIMAT0000437	CDH5	1003	NM_001795	1	1	0	1	1	4
hsa-miR-145-5p	MIMAT0000437	CDK15	65061	NM_001261435	1	1	0	1	1	4
hsa-miR-145-5p	MIMAT0000437	CDKAL1	54901	XM_005249201	1	1	0	1	1	4
hsa-miR-145-5p	MIMAT0000437	CDKAL1	54901	NM_017774	1	1	1	0	1	4
hsa-miR-145-5p	MIMAT0000437	CEBPG	1054	NM_001806	1	1	0	1	1	4
hsa-miR-145-5p	MIMAT0000437	CEP41	95681	NM_018718	1	1	0	1	1	4
hsa-miR-145-5p	MIMAT0000437	CERS4	79603	XM_005272494	1	1	0	1	1	4
hsa-miR-145-5p	MIMAT0000437	CERS5	91012	NM_147190	1	1	0	1	1	4
hsa-miR-145-5p	MIMAT0000437	CFL2	1073	NM_138638	1	1	0	1	1	4
hsa-miR-145-5p	MIMAT0000437	CGGBP1	8545	NM_001008390	1	1	0	1	1	4
hsa-miR-145-5p	MIMAT0000437	CGNL1	84952	NM_001252335	1	1	0	1	1	4
hsa-miR-145-5p	MIMAT0000437	CHAF1B	8208	NM_005441	1	1	0	1	1	4
hsa-miR-145-5p	MIMAT0000437	CHCHD5	84269	NM_032309	1	1	0	1	1	4
hsa-miR-145-5p	MIMAT0000437	CHMP2B	25978	NM_014043	1	1	0	1	1	4
hsa-miR-145-5p	MIMAT0000437	CHRNA3	1136	NM_000743	1	1	1	0	1	4
hsa-miR-145-5p	MIMAT0000437	CHST3	9469	NM_004273	1	1	0	1	1	4
hsa-miR-145-5p	MIMAT0000437	CLASP2	23122	NM_015097	1	1	1	0	1	4
hsa-miR-145-5p	MIMAT0000437	CLASP2	23122	NM_001207044	1	1	1	0	1	4
hsa-miR-145-5p	MIMAT0000437	CLCN3	1182	NM_001243374	1	1	1	0	1	4
hsa-miR-145-5p	MIMAT0000437	CLCN3	1182	NM_001243372	1	1	1	0	1	4
hsa-miR-145-5p	MIMAT0000437	CLCN3	1182	NM_001829	1	1	1	0	1	4
hsa-miR-145-5p	MIMAT0000437	CLCN5	1184	NM_000084	1	1	1	0	1	4
hsa-miR-145-5p	MIMAT0000437	CLCN5	1184	NM_001127898	1	1	1	0	1	4
hsa-miR-145-5p	MIMAT0000437	CLMN	79789	NM_024734	1	1	1	0	1	4
hsa-miR-145-5p	MIMAT0000437	CMPK2	129607	NM_207315	1	1	0	1	1	4
hsa-miR-145-5p	MIMAT0000437	CNOT4	4850	NM_001190848	1	1	0	1	1	4
hsa-miR-145-5p	MIMAT0000437	CNOT6L	246175	NM_144571	1	1	0	1	1	4
hsa-miR-145-5p	MIMAT0000437	CNPY1	285888	NM_001103176	1	1	0	1	1	4
hsa-miR-145-5p	MIMAT0000437	CNTN2	6900	NM_005076	1	1	0	1	1	4
hsa-miR-145-5p	MIMAT0000437	COL6A5	256076	NM_001278298	1	1	0	1	1	4
hsa-miR-145-5p	MIMAT0000437	COMMD5	28991	NM_014066	0	1	1	1	1	4
hsa-miR-145-5p	MIMAT0000437	COX16	51241	NM_001204090	1	1	1	0	1	4
hsa-miR-145-5p	MIMAT0000437	CP	1356	NM_000096	1	1	0	1	1	4
hsa-miR-145-5p	MIMAT0000437	CPEB3	22849	XM_005269630	1	1	0	1	1	4
hsa-miR-145-5p	MIMAT0000437	CPEB4	80315	NM_030627	1	1	0	1	1	4
hsa-miR-145-5p	MIMAT0000437	CPLX4	339302	NM_181654	0	1	1	1	1	4
hsa-miR-145-5p	MIMAT0000437	CREB3L2	64764	NM_194071	1	1	1	0	1	4
hsa-miR-145-5p	MIMAT0000437	CREBL2	1389	NM_001310	1	1	0	1	1	4
hsa-miR-145-5p	MIMAT0000437	CREBRF	153222	NM_153607	1	1	0	1	1	4
hsa-miR-145-5p	MIMAT0000437	CRISPLD2	83716	XM_005256190	1	1	0	1	1	4
hsa-miR-145-5p	MIMAT0000437	CRISPLD2	83716	NM_031476	1	1	1	0	1	4
hsa-miR-145-5p	MIMAT0000437	CRTC1	23373	NM_001098482	1	1	0	1	1	4
hsa-miR-145-5p	MIMAT0000437	CS	1431	XM_005268664	1	1	0	1	1	4
hsa-miR-145-5p	MIMAT0000437	CSRNP2	81566	NM_030809	1	1	0	1	1	4
hsa-miR-145-5p	MIMAT0000437	CSRNP3	80034	NM_001172173	1	1	0	1	1	4
hsa-miR-145-5p	MIMAT0000437	CSTF3	1479	NM_001326	1	1	1	0	1	4
hsa-miR-145-5p	MIMAT0000437	CTNND1	1500	NM_001085458	1	1	0	1	1	4
hsa-miR-145-5p	MIMAT0000437	CYBB	1536	NM_000397	1	1	0	1	1	4
hsa-miR-145-5p	MIMAT0000437	CYFIP2	26999	NM_001037332	1	1	0	1	1	4
hsa-miR-145-5p	MIMAT0000437	CYTH1	9267	NM_004762	1	1	0	1	1	4
hsa-miR-145-5p	MIMAT0000437	DAAM1	23002	XM_005267431	1	1	0	1	1	4
hsa-miR-145-5p	MIMAT0000437	DAGLA	747	NM_006133	1	1	0	1	1	4
hsa-miR-145-5p	MIMAT0000437	DCP2	167227	NM_152624	1	1	0	1	1	4
hsa-miR-145-5p	MIMAT0000437	DCUN1D3	123879	XM_005255098	1	1	0	1	1	4
hsa-miR-145-5p	MIMAT0000437	DDC	1644	NM_001242889	1	1	1	0	1	4
hsa-miR-145-5p	MIMAT0000437	DDC	1644	NM_001242888	1	1	1	0	1	4
hsa-miR-145-5p	MIMAT0000437	DDC	1644	NM_001242887	1	1	1	0	1	4
hsa-miR-145-5p	MIMAT0000437	DDC	1644	NM_001242886	1	1	1	0	1	4
hsa-miR-145-5p	MIMAT0000437	DDC	1644	NM_000790	1	1	1	0	1	4
hsa-miR-145-5p	MIMAT0000437	DDC	1644	NM_001082971	1	1	1	0	1	4
hsa-miR-145-5p	MIMAT0000437	DDX31	64794	XM_005272206	1	1	0	1	1	4
hsa-miR-145-5p	MIMAT0000437	DDX31	64794	NM_022779	1	1	1	0	1	4
hsa-miR-145-5p	MIMAT0000437	DDX46	9879	NM_014829	0	1	1	1	1	4
hsa-miR-145-5p	MIMAT0000437	DDX54	79039	NM_024072	1	1	1	0	1	4
hsa-miR-145-5p	MIMAT0000437	DECR2	26063	XM_005255246	1	1	0	1	1	4
hsa-miR-145-5p	MIMAT0000437	DENND2D	79961	NM_024901	1	1	0	1	1	4
hsa-miR-145-5p	MIMAT0000437	DERL2	51009	NM_016041	1	1	1	0	1	4
hsa-miR-145-5p	MIMAT0000437	DFFB	1677	NM_004402	1	1	0	1	1	4
hsa-miR-145-5p	MIMAT0000437	DIAPH1	1729	XM_005268384	1	1	0	1	1	4
hsa-miR-145-5p	MIMAT0000437	DIRC1	116093	NM_052952	1	1	1	0	1	4
hsa-miR-145-5p	MIMAT0000437	DNAJB2	3300	NM_006736	1	1	0	1	1	4
hsa-miR-145-5p	MIMAT0000437	DNALI1	7802	NM_003462	1	1	0	1	1	4
hsa-miR-145-5p	MIMAT0000437	DNMT3A	1788	XM_005264175	1	1	0	1	1	4
hsa-miR-145-5p	MIMAT0000437	DOCK9	23348	NM_001130048	0	1	1	1	1	4
hsa-miR-145-5p	MIMAT0000437	DOK6	220164	NM_152721	1	1	1	0	1	4
hsa-miR-145-5p	MIMAT0000437	DRG1	4733	NM_004147	1	1	0	1	1	4
hsa-miR-145-5p	MIMAT0000437	DSEL	92126	NM_032160	1	1	0	1	1	4
hsa-miR-145-5p	MIMAT0000437	DUSP6	1848	NM_022652	1	1	1	0	1	4
hsa-miR-145-5p	MIMAT0000437	DYRK1A	1859	NM_130436	1	1	0	1	1	4
hsa-miR-145-5p	MIMAT0000437	EARS2	124454	NM_001083614	1	1	0	1	1	4
hsa-miR-145-5p	MIMAT0000437	EEA1	8411	NM_003566	1	1	0	1	1	4
hsa-miR-145-5p	MIMAT0000437	EGF	1950	NM_001963	1	1	0	1	1	4
hsa-miR-145-5p	MIMAT0000437	EGF	1950	XM_005262796	1	1	0	1	1	4
hsa-miR-145-5p	MIMAT0000437	EIF2AK1	27102	NM_014413	1	1	1	0	1	4
hsa-miR-145-5p	MIMAT0000437	EIF2AK1	27102	NM_001134335	1	1	1	0	1	4
hsa-miR-145-5p	MIMAT0000437	EIF4B	1975	XM_005268709	1	1	0	1	1	4
hsa-miR-145-5p	MIMAT0000437	EIF4B	1975	NM_001417	1	1	1	0	1	4
hsa-miR-145-5p	MIMAT0000437	EIF4E3	317649	NM_001134651	1	1	1	0	1	4
hsa-miR-145-5p	MIMAT0000437	EIF4E3	317649	NM_001134650	1	1	1	0	1	4
hsa-miR-145-5p	MIMAT0000437	EIF4E3	317649	NM_173359	1	1	1	0	1	4
hsa-miR-145-5p	MIMAT0000437	EIF4EBP2	1979	NM_004096	1	1	0	1	1	4
hsa-miR-145-5p	MIMAT0000437	ELFN2	114794	NM_052906	1	1	0	1	1	4
hsa-miR-145-5p	MIMAT0000437	ELK4	2005	NM_001973	0	1	1	1	1	4
hsa-miR-145-5p	MIMAT0000437	ELL2	22936	NM_012081	0	1	1	1	1	4
hsa-miR-145-5p	MIMAT0000437	ELMO1	9844	NM_001206482	1	1	1	0	1	4
hsa-miR-145-5p	MIMAT0000437	ELMO1	9844	NM_001039459	1	1	1	0	1	4
hsa-miR-145-5p	MIMAT0000437	ELMO1	9844	NM_014800	1	1	1	0	1	4
hsa-miR-145-5p	MIMAT0000437	ELMO1	9844	NM_001206480	1	1	1	0	1	4
hsa-miR-145-5p	MIMAT0000437	ELOF1	84337	XM_005260097	1	1	0	1	1	4
hsa-miR-145-5p	MIMAT0000437	ELOVL2	54898	NM_017770	1	1	0	1	1	4
hsa-miR-145-5p	MIMAT0000437	EMILIN2	84034	NM_032048	1	1	1	0	1	4
hsa-miR-145-5p	MIMAT0000437	ENC1	8507	NM_001256574	1	1	0	1	1	4
hsa-miR-145-5p	MIMAT0000437	ENC1	8507	NM_003633	1	1	1	0	1	4
hsa-miR-145-5p	MIMAT0000437	ENKUR	219670	NM_145010	1	1	1	0	1	4
hsa-miR-145-5p	MIMAT0000437	ENSA	2029	NM_207043	1	1	1	0	1	4
hsa-miR-145-5p	MIMAT0000437	ENSA	2029	NM_207047	1	1	1	0	1	4
hsa-miR-145-5p	MIMAT0000437	ENSA	2029	NM_207044	1	1	1	0	1	4
hsa-miR-145-5p	MIMAT0000437	EPB41L4A	64097	XM_005272043	1	1	0	1	1	4
hsa-miR-145-5p	MIMAT0000437	EPB41L4A	64097	NM_022140	1	1	1	0	1	4
hsa-miR-145-5p	MIMAT0000437	EPHA4	2043	XM_005246374	1	1	0	1	1	4
hsa-miR-145-5p	MIMAT0000437	EPS15	2060	NM_001159969	1	1	1	0	1	4
hsa-miR-145-5p	MIMAT0000437	EPT1	85465	NM_033505	0	1	1	1	1	4
hsa-miR-145-5p	MIMAT0000437	ERBB4	2066	XM_005246375	1	1	0	1	1	4
hsa-miR-145-5p	MIMAT0000437	ERBB4	2066	NM_001042599	1	1	1	0	1	4
hsa-miR-145-5p	MIMAT0000437	ERBB4	2066	NM_005235	1	1	1	0	1	4
hsa-miR-145-5p	MIMAT0000437	ERG	2078	NM_001243428	1	1	0	1	1	4
hsa-miR-145-5p	MIMAT0000437	ERP44	23071	NM_015051	1	1	0	1	1	4
hsa-miR-145-5p	MIMAT0000437	EXOC8	149371	NM_175876	1	1	1	0	1	4
hsa-miR-145-5p	MIMAT0000437	EYA3	2140	NM_001990	1	1	0	1	1	4
hsa-miR-145-5p	MIMAT0000437	F11	2160	NM_000128	1	1	1	0	1	4
hsa-miR-145-5p	MIMAT0000437	FAM110C	642273	NM_001077710	1	1	1	0	1	4
hsa-miR-145-5p	MIMAT0000437	FAM129A	116496	NM_052966	1	1	0	1	1	4
hsa-miR-145-5p	MIMAT0000437	FAM135A	57579	NM_020819	1	1	1	0	1	4
hsa-miR-145-5p	MIMAT0000437	FAM135A	57579	NM_001105531	1	1	1	0	1	4
hsa-miR-145-5p	MIMAT0000437	FAM135A	57579	NM_001162529	1	1	1	0	1	4
hsa-miR-145-5p	MIMAT0000437	FAM174B	400451	NM_207446	1	1	0	1	1	4
hsa-miR-145-5p	MIMAT0000437	FAM178A	55719	NM_018121	1	1	0	1	1	4
hsa-miR-145-5p	MIMAT0000437	FAM189A1	23359	XM_005254261	1	1	0	1	1	4
hsa-miR-145-5p	MIMAT0000437	FAM203A	51236	NM_016458	1	1	0	1	1	4
hsa-miR-145-5p	MIMAT0000437	FAM221B	392307	NM_001012446	1	1	0	1	1	4
hsa-miR-145-5p	MIMAT0000437	FAM222B	55731	XM_005258002	1	1	0	1	1	4
hsa-miR-145-5p	MIMAT0000437	FAM222B	55731	NM_001077498	1	1	1	0	1	4
hsa-miR-145-5p	MIMAT0000437	FAM222B	55731	NM_018182	1	1	1	0	1	4
hsa-miR-145-5p	MIMAT0000437	FAM229B	619208	NM_001033564	1	1	0	1	1	4
hsa-miR-145-5p	MIMAT0000437	FAM81A	145773	XM_005254167	1	1	0	1	1	4
hsa-miR-145-5p	MIMAT0000437	FANCC	2176	NM_000136	1	1	0	1	1	4
hsa-miR-145-5p	MIMAT0000437	FAR1	84188	NM_032228	1	1	1	0	1	4
hsa-miR-145-5p	MIMAT0000437	FBXL3	26224	XM_005266335	1	1	0	1	1	4
hsa-miR-145-5p	MIMAT0000437	FBXO28	23219	NM_015176	1	1	0	1	1	4
hsa-miR-145-5p	MIMAT0000437	FBXO45	200933	NM_001105573	1	1	0	1	1	4
hsa-miR-145-5p	MIMAT0000437	FBXO9	26268	NM_012347	1	1	1	0	1	4
hsa-miR-145-5p	MIMAT0000437	FBXO9	26268	NM_033481	1	1	1	0	1	4
hsa-miR-145-5p	MIMAT0000437	FCGR3A	2214	NM_000569	1	1	0	1	1	4
hsa-miR-145-5p	MIMAT0000437	FCGR3B	2215	NM_001244753	1	1	0	1	1	4
hsa-miR-145-5p	MIMAT0000437	FDX1	2230	NM_004109	0	1	1	1	1	4
hsa-miR-145-5p	MIMAT0000437	FGF5	2250	NM_033143	1	1	1	0	1	4
hsa-miR-145-5p	MIMAT0000437	FGFBP3	143282	NM_152429	1	1	0	1	1	4
hsa-miR-145-5p	MIMAT0000437	FGFR2	2263	NM_022970	1	1	0	1	1	4
hsa-miR-145-5p	MIMAT0000437	FGFR3	2261	NM_001163213	1	1	0	1	1	4
hsa-miR-145-5p	MIMAT0000437	FHDC1	85462	XM_005263319	1	1	0	1	1	4
hsa-miR-145-5p	MIMAT0000437	FLI1	2313	NM_002017	1	1	1	0	1	4
hsa-miR-145-5p	MIMAT0000437	FLI1	2313	NM_001167681	1	1	1	0	1	4
hsa-miR-145-5p	MIMAT0000437	FLNB	2317	NM_001164319	1	1	1	0	1	4
hsa-miR-145-5p	MIMAT0000437	FLNB	2317	NM_001164318	1	1	1	0	1	4
hsa-miR-145-5p	MIMAT0000437	FLNB	2317	NM_001457	1	1	1	0	1	4
hsa-miR-145-5p	MIMAT0000437	FLVCR1	28982	NM_014053	0	1	1	1	1	4
hsa-miR-145-5p	MIMAT0000437	FMNL2	114793	XM_005246263	1	1	0	1	1	4
hsa-miR-145-5p	MIMAT0000437	FN1	2335	NM_212474	1	1	1	0	1	4
hsa-miR-145-5p	MIMAT0000437	FN1	2335	NM_212476	1	1	1	0	1	4
hsa-miR-145-5p	MIMAT0000437	FN1	2335	NM_212478	1	1	1	0	1	4
hsa-miR-145-5p	MIMAT0000437	FN1	2335	NM_002026	1	1	1	0	1	4
hsa-miR-145-5p	MIMAT0000437	FNDC3A	22862	NM_001278438	1	1	0	1	1	4
hsa-miR-145-5p	MIMAT0000437	FNDC3A	22862	NM_014923	1	1	1	0	1	4
hsa-miR-145-5p	MIMAT0000437	FNDC3A	22862	NM_001079673	1	1	1	0	1	4
hsa-miR-145-5p	MIMAT0000437	FNDC3B	64778	NM_022763	1	1	1	0	1	4
hsa-miR-145-5p	MIMAT0000437	FNDC3B	64778	NM_001135095	1	1	1	0	1	4
hsa-miR-145-5p	MIMAT0000437	FOXE1	2304	NM_004473	0	1	1	1	1	4
hsa-miR-145-5p	MIMAT0000437	FREM1	158326	NM_144966	1	1	0	1	1	4
hsa-miR-145-5p	MIMAT0000437	FRMD3	257019	NM_001244960	1	1	1	0	1	4
hsa-miR-145-5p	MIMAT0000437	FRMD4A	55691	XM_005252489	1	1	0	1	1	4
hsa-miR-145-5p	MIMAT0000437	FRS2	10818	NM_001042555	1	1	1	0	1	4
hsa-miR-145-5p	MIMAT0000437	FRS2	10818	NM_006654	1	1	1	0	1	4
hsa-miR-145-5p	MIMAT0000437	FSD1L	83856	NM_207647	1	1	1	0	1	4
hsa-miR-145-5p	MIMAT0000437	FUT9	10690	NM_006581	1	1	1	0	1	4
hsa-miR-145-5p	MIMAT0000437	FZD3	7976	NM_017412	1	1	0	1	1	4
hsa-miR-145-5p	MIMAT0000437	FZD4	8322	NM_012193	1	1	0	1	1	4
hsa-miR-145-5p	MIMAT0000437	FZD5	7855	NM_003468	1	1	0	1	1	4
hsa-miR-145-5p	MIMAT0000437	FZD7	8324	NM_003507	1	1	0	1	1	4
hsa-miR-145-5p	MIMAT0000437	G3BP1	10146	NM_005754	1	1	0	1	1	4
hsa-miR-145-5p	MIMAT0000437	GAB3	139716	NM_001081573	1	1	0	1	1	4
hsa-miR-145-5p	MIMAT0000437	GALR1	2587	NM_001480	1	1	1	0	1	4
hsa-miR-145-5p	MIMAT0000437	GAREM	64762	NM_022751	1	1	1	0	1	4
hsa-miR-145-5p	MIMAT0000437	GATAD1	57798	NM_021167	1	1	1	0	1	4
hsa-miR-145-5p	MIMAT0000437	GATAD2A	54815	XM_005259956	1	1	0	1	1	4
hsa-miR-145-5p	MIMAT0000437	GBA	2629	NM_001005741	1	1	0	1	1	4
hsa-miR-145-5p	MIMAT0000437	GCC1	79571	NM_024523	1	1	0	1	1	4
hsa-miR-145-5p	MIMAT0000437	GCFC2	6936	NM_003203	1	1	0	1	1	4
hsa-miR-145-5p	MIMAT0000437	GCGR	2642	NM_000160	1	1	0	1	1	4
hsa-miR-145-5p	MIMAT0000437	GCLM	2730	NM_002061	1	1	1	0	1	4
hsa-miR-145-5p	MIMAT0000437	GDE1	51573	NM_016641	1	1	0	1	1	4
hsa-miR-145-5p	MIMAT0000437	GDF11	10220	NM_005811	1	1	0	1	1	4
hsa-miR-145-5p	MIMAT0000437	GEMIN4	50628	XM_005256669	1	1	0	1	1	4
hsa-miR-145-5p	MIMAT0000437	GEN1	348654	XM_005262612	1	1	0	1	1	4
hsa-miR-145-5p	MIMAT0000437	GFRA1	2674	NM_145793	1	1	1	0	1	4
hsa-miR-145-5p	MIMAT0000437	GFRA1	2674	NM_001145453	1	1	1	0	1	4
hsa-miR-145-5p	MIMAT0000437	GINS3	64785	NM_001126129	1	1	0	1	1	4
hsa-miR-145-5p	MIMAT0000437	GJB7	375519	NM_198568	1	1	1	0	1	4
hsa-miR-145-5p	MIMAT0000437	GLCE	26035	XM_005254298	1	1	0	1	1	4
hsa-miR-145-5p	MIMAT0000437	GLCE	26035	NM_015554	1	1	1	0	1	4
hsa-miR-145-5p	MIMAT0000437	GLIS3	169792	NM_001042413	1	1	1	0	1	4
hsa-miR-145-5p	MIMAT0000437	GLIS3	169792	NM_152629	1	1	1	0	1	4
hsa-miR-145-5p	MIMAT0000437	GNPDA2	132789	XM_005248051	1	1	0	1	1	4
hsa-miR-145-5p	MIMAT0000437	GORAB	92344	NM_152281	0	1	1	1	1	4
hsa-miR-145-5p	MIMAT0000437	GPBP1	65056	NM_001127236	1	1	1	0	1	4
hsa-miR-145-5p	MIMAT0000437	GPBP1	65056	NM_001127235	1	1	1	0	1	4
hsa-miR-145-5p	MIMAT0000437	GPBP1	65056	NM_001203246	1	1	1	0	1	4
hsa-miR-145-5p	MIMAT0000437	GPD2	2820	NM_000408	1	1	1	0	1	4
hsa-miR-145-5p	MIMAT0000437	GPHN	10243	NM_001024218	1	1	1	0	1	4
hsa-miR-145-5p	MIMAT0000437	GPI	2821	NM_000175	1	1	1	0	1	4
hsa-miR-145-5p	MIMAT0000437	GPR61	83873	XM_005271246	1	1	0	1	1	4
hsa-miR-145-5p	MIMAT0000437	GPR62	118442	NM_080865	1	1	0	1	1	4
hsa-miR-145-5p	MIMAT0000437	GRB10	2887	XM_005271760	1	1	0	1	1	4
hsa-miR-145-5p	MIMAT0000437	GRB10	2887	NM_001001549	1	1	1	0	1	4
hsa-miR-145-5p	MIMAT0000437	GRB10	2887	NM_005311	1	1	1	0	1	4
hsa-miR-145-5p	MIMAT0000437	GRB10	2887	NM_001001550	1	1	1	0	1	4
hsa-miR-145-5p	MIMAT0000437	GRB10	2887	NM_001001555	1	1	1	0	1	4
hsa-miR-145-5p	MIMAT0000437	GRIN2A	2903	NM_001134407	1	1	0	1	1	4
hsa-miR-145-5p	MIMAT0000437	GRM6	2916	NM_000843	1	1	0	1	1	4
hsa-miR-145-5p	MIMAT0000437	GRPEL2	134266	XM_005268374	1	1	0	1	1	4
hsa-miR-145-5p	MIMAT0000437	GTPBP10	85865	NM_033107	1	1	0	1	1	4
hsa-miR-145-5p	MIMAT0000437	GTPBP8	29083	NM_014170	0	1	1	1	1	4
hsa-miR-145-5p	MIMAT0000437	GXYLT1	283464	NM_001099650	1	1	1	0	1	4
hsa-miR-145-5p	MIMAT0000437	H2AFX	3014	NM_002105	0	1	1	1	1	4
hsa-miR-145-5p	MIMAT0000437	HCN4	10021	NM_005477	1	1	0	1	1	4
hsa-miR-145-5p	MIMAT0000437	HDAC4	9759	NM_006037	1	1	0	1	1	4
hsa-miR-145-5p	MIMAT0000437	HECW2	57520	NM_020760	1	1	1	0	1	4
hsa-miR-145-5p	MIMAT0000437	HELZ	9931	XM_005257888	1	1	0	1	1	4
hsa-miR-145-5p	MIMAT0000437	HES2	54626	XM_005263478	1	1	0	1	1	4
hsa-miR-145-5p	MIMAT0000437	HHEX	3087	NM_002729	1	1	1	0	1	4
hsa-miR-145-5p	MIMAT0000437	HIC2	23119	XM_005261395	1	1	0	1	1	4
hsa-miR-145-5p	MIMAT0000437	HIC2	23119	NM_015094	1	1	1	0	1	4
hsa-miR-145-5p	MIMAT0000437	HIPK2	28996	NM_001113239	1	1	1	0	1	4
hsa-miR-145-5p	MIMAT0000437	HLTF	6596	NM_003071	1	1	1	0	1	4
hsa-miR-145-5p	MIMAT0000437	HLTF	6596	NM_139048	1	1	1	0	1	4
hsa-miR-145-5p	MIMAT0000437	HMBOX1	79618	XM_005273634	1	1	0	1	1	4
hsa-miR-145-5p	MIMAT0000437	HNRNPUL2	221092	NM_001079559	1	1	0	1	1	4
hsa-miR-145-5p	MIMAT0000437	HOXC11	3227	NM_014212	1	1	0	1	1	4
hsa-miR-145-5p	MIMAT0000437	HPCAL4	51440	NM_016257	1	1	0	1	1	4
hsa-miR-145-5p	MIMAT0000437	HS3ST4	9951	NM_006040	0	1	1	1	1	4
hsa-miR-145-5p	MIMAT0000437	HS6ST1	9394	NM_004807	1	1	0	1	1	4
hsa-miR-145-5p	MIMAT0000437	HS6ST2	90161	NM_001077188	1	1	0	1	1	4
hsa-miR-145-5p	MIMAT0000437	HSPA14	51182	NM_001278205	1	1	0	1	1	4
hsa-miR-145-5p	MIMAT0000437	HTR1F	3355	NM_000866	1	1	1	0	1	4
hsa-miR-145-5p	MIMAT0000437	HTR2C	3358	NM_001256760	1	1	0	1	1	4
hsa-miR-145-5p	MIMAT0000437	HTR2C	3358	NM_000868	1	1	1	0	1	4
hsa-miR-145-5p	MIMAT0000437	HYAL2	8692	NM_033158	1	1	0	1	1	4
hsa-miR-145-5p	MIMAT0000437	IGF1	3479	NM_001111283	1	1	0	1	1	4
hsa-miR-145-5p	MIMAT0000437	IGF1R	3480	NM_000875	1	1	0	1	1	4
hsa-miR-145-5p	MIMAT0000437	IKZF1	10320	NM_006060	1	1	0	1	1	4
hsa-miR-145-5p	MIMAT0000437	IL18R1	8809	NM_003855	1	1	0	1	1	4
hsa-miR-145-5p	MIMAT0000437	IL2RA	3559	NM_000417	1	1	0	1	1	4
hsa-miR-145-5p	MIMAT0000437	IMP3	55272	NM_018285	1	1	1	0	1	4
hsa-miR-145-5p	MIMAT0000437	INADL	10207	NM_176877	1	1	1	0	1	4
hsa-miR-145-5p	MIMAT0000437	ING5	84289	NM_032329	1	1	0	1	1	4
hsa-miR-145-5p	MIMAT0000437	INPP4A	3631	NM_001134224	1	1	0	1	1	4
hsa-miR-145-5p	MIMAT0000437	IPCEF1	26034	NM_001130699	1	1	0	1	1	4
hsa-miR-145-5p	MIMAT0000437	IPMK	253430	NM_152230	1	1	1	0	1	4
hsa-miR-145-5p	MIMAT0000437	IRGQ	126298	NM_001007561	1	1	0	1	1	4
hsa-miR-145-5p	MIMAT0000437	IRS2	8660	NM_003749	1	1	0	1	1	4
hsa-miR-145-5p	MIMAT0000437	ITCH	83737	NM_001257137	1	1	0	1	1	4
hsa-miR-145-5p	MIMAT0000437	ITGAL	3683	NM_002209	1	1	0	1	1	4
hsa-miR-145-5p	MIMAT0000437	ITGB8	3696	NM_002214	1	1	1	0	1	4
hsa-miR-145-5p	MIMAT0000437	ITLN2	142683	NM_080878	1	1	1	0	1	4
hsa-miR-145-5p	MIMAT0000437	ITPR2	3709	NM_002223	1	1	0	1	1	4
hsa-miR-145-5p	MIMAT0000437	IYD	389434	NM_203395	1	1	1	0	1	4
hsa-miR-145-5p	MIMAT0000437	IYD	389434	NM_001164695	1	1	1	0	1	4
hsa-miR-145-5p	MIMAT0000437	JHDM1D	80853	NM_030647	1	1	0	1	1	4
hsa-miR-145-5p	MIMAT0000437	KBTBD12	166348	XM_005247167	1	1	0	1	1	4
hsa-miR-145-5p	MIMAT0000437	KBTBD8	84541	NM_032505	1	1	0	1	1	4
hsa-miR-145-5p	MIMAT0000437	KCNA1	3736	NM_000217	1	1	0	1	1	4
hsa-miR-145-5p	MIMAT0000437	KCNA6	3742	XM_005253686	1	1	0	1	1	4
hsa-miR-145-5p	MIMAT0000437	KCNA6	3742	NM_002235	1	1	1	0	1	4
hsa-miR-145-5p	MIMAT0000437	KCNE1	3753	NM_000219	1	1	0	1	1	4
hsa-miR-145-5p	MIMAT0000437	KCNT2	343450	XM_005245133	1	1	0	1	1	4
hsa-miR-145-5p	MIMAT0000437	KCNT2	343450	NM_198503	1	1	1	0	1	4
hsa-miR-145-5p	MIMAT0000437	KCTD15	79047	NM_024076	1	1	0	1	1	4
hsa-miR-145-5p	MIMAT0000437	KCTD2	23510	NM_015353	1	1	0	1	1	4
hsa-miR-145-5p	MIMAT0000437	KIAA0930	23313	NM_015264	1	1	0	1	1	4
hsa-miR-145-5p	MIMAT0000437	KIAA1467	57613	NM_020853	1	1	0	1	1	4
hsa-miR-145-5p	MIMAT0000437	KIAA1549L	25758	NM_012194	1	1	0	1	1	4
hsa-miR-145-5p	MIMAT0000437	KIAA1958	158405	XM_005251739	1	1	0	1	1	4
hsa-miR-145-5p	MIMAT0000437	KIF1B	23095	XM_005263433	1	1	0	1	1	4
hsa-miR-145-5p	MIMAT0000437	KLF14	136259	NM_138693	0	1	1	1	1	4
hsa-miR-145-5p	MIMAT0000437	KLF3	51274	NM_016531	1	1	0	1	1	4
hsa-miR-145-5p	MIMAT0000437	KLF5	688	NM_001730	1	1	1	0	1	4
hsa-miR-145-5p	MIMAT0000437	KLHL15	80311	NM_030624	1	1	0	1	1	4
hsa-miR-145-5p	MIMAT0000437	KPNA4	3840	NM_002268	1	1	0	1	1	4
hsa-miR-145-5p	MIMAT0000437	KRT80	144501	XM_005268675	1	1	0	1	1	4
hsa-miR-145-5p	MIMAT0000437	KSR2	283455	NM_173598	1	1	0	1	1	4
hsa-miR-145-5p	MIMAT0000437	LAMP2	3920	NM_002294	1	1	1	0	1	4
hsa-miR-145-5p	MIMAT0000437	LAMP2	3920	NM_001122606	1	1	1	0	1	4
hsa-miR-145-5p	MIMAT0000437	LAMP2	3920	NM_013995	1	1	1	0	1	4
hsa-miR-145-5p	MIMAT0000437	LANCL2	55915	NM_018697	1	1	0	1	1	4
hsa-miR-145-5p	MIMAT0000437	LAPTM5	7805	NM_006762	1	1	0	1	1	4
hsa-miR-145-5p	MIMAT0000437	LARP4B	23185	NM_015155	1	1	1	0	1	4
hsa-miR-145-5p	MIMAT0000437	LASP1	3927	NM_006148	1	1	0	1	1	4
hsa-miR-145-5p	MIMAT0000437	LCORL	254251	NM_153686	1	1	1	0	1	4
hsa-miR-145-5p	MIMAT0000437	LCP1	3936	NM_002298	1	1	0	1	1	4
hsa-miR-145-5p	MIMAT0000437	LDB1	8861	XM_005270262	1	1	0	1	1	4
hsa-miR-145-5p	MIMAT0000437	LDLR	3949	NM_000527	1	1	0	1	1	4
hsa-miR-145-5p	MIMAT0000437	LDLRAD4	753	NM_001003674	1	1	0	1	1	4
hsa-miR-145-5p	MIMAT0000437	LHFPL2	10184	NM_005779	1	1	0	1	1	4
hsa-miR-145-5p	MIMAT0000437	LHFPL5	222662	NM_182548	1	1	0	1	1	4
hsa-miR-145-5p	MIMAT0000437	LILRB2	10288	NM_005874	1	1	1	0	1	4
hsa-miR-145-5p	MIMAT0000437	LILRB2	10288	NM_001080978	1	1	1	0	1	4
hsa-miR-145-5p	MIMAT0000437	LMLN	89782	NM_001136049	1	1	0	1	1	4
hsa-miR-145-5p	MIMAT0000437	LOX	4015	NM_002317	0	1	1	1	1	4
hsa-miR-145-5p	MIMAT0000437	LPGAT1	9926	XM_005273364	1	1	0	1	1	4
hsa-miR-145-5p	MIMAT0000437	LPIN2	9663	NM_014646	1	1	0	1	1	4
hsa-miR-145-5p	MIMAT0000437	LPP	4026	XM_005247445	1	1	0	1	1	4
hsa-miR-145-5p	MIMAT0000437	LPP	4026	NM_001167672	1	1	1	0	1	4
hsa-miR-145-5p	MIMAT0000437	LPP	4026	NM_001167671	1	1	1	0	1	4
hsa-miR-145-5p	MIMAT0000437	LPP	4026	NM_005578	1	1	1	0	1	4
hsa-miR-145-5p	MIMAT0000437	LRAT	9227	NM_004744	0	1	1	1	1	4
hsa-miR-145-5p	MIMAT0000437	LRCH2	57631	NM_001243963	1	1	1	0	1	4
hsa-miR-145-5p	MIMAT0000437	LRP2	4036	NM_004525	0	1	1	1	1	4
hsa-miR-145-5p	MIMAT0000437	LRP6	4040	NM_002336	1	1	0	1	1	4
hsa-miR-145-5p	MIMAT0000437	LRRC27	80313	NM_001143757	1	1	0	1	1	4
hsa-miR-145-5p	MIMAT0000437	LRRC59	55379	NM_018509	1	1	0	1	1	4
hsa-miR-145-5p	MIMAT0000437	LUZP1	7798	XM_005245991	1	1	0	1	1	4
hsa-miR-145-5p	MIMAT0000437	LYNX1	66004	NM_177457	1	1	0	1	1	4
hsa-miR-145-5p	MIMAT0000437	LYSMD1	388695	NM_212551	1	1	0	1	1	4
hsa-miR-145-5p	MIMAT0000437	LYZL1	84569	NM_032517	1	1	0	1	1	4
hsa-miR-145-5p	MIMAT0000437	LYZL2	119180	NM_183058	1	1	0	1	1	4
hsa-miR-145-5p	MIMAT0000437	M1AP	130951	NM_138804	1	1	0	1	1	4
hsa-miR-145-5p	MIMAT0000437	MAF	4094	NM_001031804	1	1	0	1	1	4
hsa-miR-145-5p	MIMAT0000437	MAGOHB	55110	NM_018048	1	1	1	0	1	4
hsa-miR-145-5p	MIMAT0000437	MAK16	84549	NM_032509	1	1	0	1	1	4
hsa-miR-145-5p	MIMAT0000437	MAP1LC3B	81631	XM_005256184	1	1	0	1	1	4
hsa-miR-145-5p	MIMAT0000437	MAP3K12	7786	XM_005269139	1	1	0	1	1	4
hsa-miR-145-5p	MIMAT0000437	MAP3K13	9175	NM_004721	1	1	0	1	1	4
hsa-miR-145-5p	MIMAT0000437	MAP3K3	4215	XM_005257376	1	1	0	1	1	4
hsa-miR-145-5p	MIMAT0000437	MAP4K2	5871	XM_005274142	1	1	0	1	1	4
hsa-miR-145-5p	MIMAT0000437	MAP6D1	79929	NM_024871	1	1	0	1	1	4
hsa-miR-145-5p	MIMAT0000437	MAPK4	5596	XM_005258299	1	1	0	1	1	4
hsa-miR-145-5p	MIMAT0000437	MAPK9	5601	XM_005265940	1	1	0	1	1	4
hsa-miR-145-5p	MIMAT0000437	MARCH1	55016	XM_005263085	1	1	0	1	1	4
hsa-miR-145-5p	MIMAT0000437	MBNL3	55796	XM_005262434	1	1	0	1	1	4
hsa-miR-145-5p	MIMAT0000437	MBNL3	55796	NM_001170703	1	1	1	0	1	4
hsa-miR-145-5p	MIMAT0000437	MBNL3	55796	NM_001170702	1	1	1	0	1	4
hsa-miR-145-5p	MIMAT0000437	MBNL3	55796	NM_001170701	1	1	1	0	1	4
hsa-miR-145-5p	MIMAT0000437	MBNL3	55796	NM_133486	1	1	1	0	1	4
hsa-miR-145-5p	MIMAT0000437	MBNL3	55796	NM_018388	1	1	1	0	1	4
hsa-miR-145-5p	MIMAT0000437	MBNL3	55796	NM_001170704	1	1	1	0	1	4
hsa-miR-145-5p	MIMAT0000437	MCF2L	23263	XM_005268310	1	1	0	1	1	4
hsa-miR-145-5p	MIMAT0000437	MCM9	254394	NM_153255	1	1	1	0	1	4
hsa-miR-145-5p	MIMAT0000437	MED31	51003	NM_016060	1	1	0	1	1	4
hsa-miR-145-5p	MIMAT0000437	MED9	55090	NM_018019	1	1	1	0	1	4
hsa-miR-145-5p	MIMAT0000437	MEF2A	4205	NM_001171894	1	1	0	1	1	4
hsa-miR-145-5p	MIMAT0000437	MEGF10	84466	XM_005272114	1	1	0	1	1	4
hsa-miR-145-5p	MIMAT0000437	MEST	4232	NM_002402	1	1	1	0	1	4
hsa-miR-145-5p	MIMAT0000437	MEST	4232	NM_177525	1	1	1	0	1	4
hsa-miR-145-5p	MIMAT0000437	MEST	4232	NM_177524	1	1	1	0	1	4
hsa-miR-145-5p	MIMAT0000437	MFAP3	4238	NM_001242336	1	1	0	1	1	4
hsa-miR-145-5p	MIMAT0000437	MFRP	83552	NM_031433	1	1	0	1	1	4
hsa-miR-145-5p	MIMAT0000437	MFSD8	256471	NM_152778	1	1	0	1	1	4
hsa-miR-145-5p	MIMAT0000437	MGAT4A	11320	NM_012214	1	1	0	1	1	4
hsa-miR-145-5p	MIMAT0000437	MGLL	11343	NM_007283	1	1	0	1	1	4
hsa-miR-145-5p	MIMAT0000437	MKL2	57496	NM_014048	1	1	1	0	1	4
hsa-miR-145-5p	MIMAT0000437	MKLN1	4289	NM_001145354	1	1	0	1	1	4
hsa-miR-145-5p	MIMAT0000437	MLC1	23209	NM_015166	0	1	1	1	1	4
hsa-miR-145-5p	MIMAT0000437	MLKL	197259	NM_152649	1	1	0	1	1	4
hsa-miR-145-5p	MIMAT0000437	MMP11	4320	NM_005940	1	1	0	1	1	4
hsa-miR-145-5p	MIMAT0000437	MMP16	4325	NM_005941	1	1	1	0	1	4
hsa-miR-145-5p	MIMAT0000437	MOCS2	4338	NM_004531	1	1	0	1	1	4
hsa-miR-145-5p	MIMAT0000437	MOG	4340	XM_005249131	1	1	0	1	1	4
hsa-miR-145-5p	MIMAT0000437	MON2	23041	NM_001278472	1	1	0	1	1	4
hsa-miR-145-5p	MIMAT0000437	MORN4	118812	NM_178832	1	1	0	1	1	4
hsa-miR-145-5p	MIMAT0000437	MPP5	64398	NM_022474	0	1	1	1	1	4
hsa-miR-145-5p	MIMAT0000437	MPZL2	10205	NM_005797	1	1	1	0	1	4
hsa-miR-145-5p	MIMAT0000437	MR1	3140	NM_001531	1	1	0	1	1	4
hsa-miR-145-5p	MIMAT0000437	MRFAP1	93621	NM_033296	1	1	0	1	1	4
hsa-miR-145-5p	MIMAT0000437	MRVI1	10335	XM_005252736	1	1	0	1	1	4
hsa-miR-145-5p	MIMAT0000437	MSI2	124540	XM_005257014	1	1	0	1	1	4
hsa-miR-145-5p	MIMAT0000437	MTX3	345778	NM_001010891	1	1	1	0	1	4
hsa-miR-145-5p	MIMAT0000437	MTX3	345778	NM_001167741	1	1	1	0	1	4
hsa-miR-145-5p	MIMAT0000437	MYCN	4613	NM_005378	1	1	0	1	1	4
hsa-miR-145-5p	MIMAT0000437	MYO1D	4642	NM_015194	1	1	0	1	1	4
hsa-miR-145-5p	MIMAT0000437	MYO5A	4644	NM_001142495	1	1	1	0	1	4
hsa-miR-145-5p	MIMAT0000437	MYO6	4646	NM_004999	1	1	1	0	1	4
hsa-miR-145-5p	MIMAT0000437	MYOZ3	91977	NM_001122853	1	1	0	1	1	4
hsa-miR-145-5p	MIMAT0000437	MYRF	745	XM_005274222	1	1	0	1	1	4
hsa-miR-145-5p	MIMAT0000437	MYRF	745	NM_013279	1	1	1	0	1	4
hsa-miR-145-5p	MIMAT0000437	MYRF	745	NM_001127392	1	1	1	0	1	4
hsa-miR-145-5p	MIMAT0000437	MYSM1	114803	XM_005270418	1	1	0	1	1	4
hsa-miR-145-5p	MIMAT0000437	NAIP	4671	NM_004536	1	1	1	0	1	4
hsa-miR-145-5p	MIMAT0000437	NAIP	4671	NM_022892	1	1	1	0	1	4
hsa-miR-145-5p	MIMAT0000437	NAP1L1	4673	NM_004537	1	1	0	1	1	4
hsa-miR-145-5p	MIMAT0000437	NAT16	375607	NM_198571	1	1	0	1	1	4
hsa-miR-145-5p	MIMAT0000437	NAV3	89795	XM_005269214	1	1	0	1	1	4
hsa-miR-145-5p	MIMAT0000437	NAV3	89795	NM_014903	1	1	1	0	1	4
hsa-miR-145-5p	MIMAT0000437	NCOA3	8202	NM_181659	1	1	0	1	1	4
hsa-miR-145-5p	MIMAT0000437	NCR3LG1	374383	NM_001202439	1	1	0	1	1	4
hsa-miR-145-5p	MIMAT0000437	NDST1	3340	XM_005268435	1	1	0	1	1	4
hsa-miR-145-5p	MIMAT0000437	NDUFA4	4697	NM_002489	1	1	1	0	1	4
hsa-miR-145-5p	MIMAT0000437	NDUFB5	4711	NM_001199957	1	1	1	0	1	4
hsa-miR-145-5p	MIMAT0000437	NDUFB5	4711	NM_001199958	1	1	1	0	1	4
hsa-miR-145-5p	MIMAT0000437	NEDD4L	23327	XM_005266657	1	1	0	1	1	4
hsa-miR-145-5p	MIMAT0000437	NEDD4L	23327	NM_001243960	1	1	1	0	1	4
hsa-miR-145-5p	MIMAT0000437	NEDD4L	23327	NM_001144966	1	1	1	0	1	4
hsa-miR-145-5p	MIMAT0000437	NEDD4L	23327	NM_001144969	1	1	1	0	1	4
hsa-miR-145-5p	MIMAT0000437	NEDD4L	23327	NM_001144970	1	1	1	0	1	4
hsa-miR-145-5p	MIMAT0000437	NEDD4L	23327	NM_001144968	1	1	1	0	1	4
hsa-miR-145-5p	MIMAT0000437	NEDD4L	23327	NM_001144965	1	1	1	0	1	4
hsa-miR-145-5p	MIMAT0000437	NEDD4L	23327	NM_001144971	1	1	1	0	1	4
hsa-miR-145-5p	MIMAT0000437	NEDD4L	23327	NM_015277	1	1	1	0	1	4
hsa-miR-145-5p	MIMAT0000437	NEDD4L	23327	NM_001144964	1	1	1	0	1	4
hsa-miR-145-5p	MIMAT0000437	NEDD4L	23327	NM_001144967	1	1	1	0	1	4
hsa-miR-145-5p	MIMAT0000437	NEDD9	4739	NM_006403	1	1	1	0	1	4
hsa-miR-145-5p	MIMAT0000437	NEGR1	257194	NM_173808	1	1	1	0	1	4
hsa-miR-145-5p	MIMAT0000437	NET1	10276	NM_001047160	0	1	1	1	1	4
hsa-miR-145-5p	MIMAT0000437	NETO1	81832	NM_138966	1	1	1	0	1	4
hsa-miR-145-5p	MIMAT0000437	NEUROG1	4762	NM_006161	1	1	0	1	1	4
hsa-miR-145-5p	MIMAT0000437	NFE2L1	4779	NM_003204	1	1	0	1	1	4
hsa-miR-145-5p	MIMAT0000437	NFIA	4774	NM_001134673	1	1	0	1	1	4
hsa-miR-145-5p	MIMAT0000437	NFKBIZ	64332	NM_031419	1	1	0	1	1	4
hsa-miR-145-5p	MIMAT0000437	NKAIN1	79570	NM_024522	1	1	0	1	1	4
hsa-miR-145-5p	MIMAT0000437	NOB1	28987	NM_014062	1	1	0	1	1	4
hsa-miR-145-5p	MIMAT0000437	NR2F2	7026	NM_021005	1	1	0	1	1	4
hsa-miR-145-5p	MIMAT0000437	NR4A2	4929	NM_006186	1	1	1	0	1	4
hsa-miR-145-5p	MIMAT0000437	NR4A3	8013	NM_173200	1	1	0	1	1	4
hsa-miR-145-5p	MIMAT0000437	NRIP3	56675	NM_020645	1	1	0	1	1	4
hsa-miR-145-5p	MIMAT0000437	NRP2	8828	NM_201279	1	1	1	0	1	4
hsa-miR-145-5p	MIMAT0000437	NRP2	8828	NM_003872	1	1	1	0	1	4
hsa-miR-145-5p	MIMAT0000437	NSL1	25936	NM_001042549	1	1	1	0	1	4
hsa-miR-145-5p	MIMAT0000437	NSL1	25936	NM_015471	1	1	1	0	1	4
hsa-miR-145-5p	MIMAT0000437	NUAK1	9891	NM_014840	0	1	1	1	1	4
hsa-miR-145-5p	MIMAT0000437	NUCKS1	64710	NM_022731	1	1	0	1	1	4
hsa-miR-145-5p	MIMAT0000437	NUDT1	4521	NM_198949	1	1	0	1	1	4
hsa-miR-145-5p	MIMAT0000437	NUDT21	11051	NM_007006	1	1	0	1	1	4
hsa-miR-145-5p	MIMAT0000437	OAS3	4940	NM_006187	1	1	0	1	1	4
hsa-miR-145-5p	MIMAT0000437	ODF2L	57489	NM_001007022	1	1	0	1	1	4
hsa-miR-145-5p	MIMAT0000437	OGG1	4968	NM_016828	1	1	0	1	1	4
hsa-miR-145-5p	MIMAT0000437	OLFML2A	169611	NM_182487	1	1	0	1	1	4
hsa-miR-145-5p	MIMAT0000437	OS9	10956	NM_001017957	1	1	1	0	1	4
hsa-miR-145-5p	MIMAT0000437	OS9	10956	NM_001017956	1	1	1	0	1	4
hsa-miR-145-5p	MIMAT0000437	OSBP	5007	NM_002556	1	1	0	1	1	4
hsa-miR-145-5p	MIMAT0000437	OTOR	56914	NM_020157	1	1	1	0	1	4
hsa-miR-145-5p	MIMAT0000437	OXER1	165140	NM_148962	1	1	0	1	1	4
hsa-miR-145-5p	MIMAT0000437	P2RY2	5029	NM_002564	1	1	1	0	1	4
hsa-miR-145-5p	MIMAT0000437	P2RY2	5029	NM_176071	1	1	1	0	1	4
hsa-miR-145-5p	MIMAT0000437	P2RY8	286530	XM_005274429	1	1	0	1	1	4
hsa-miR-145-5p	MIMAT0000437	P2RY8	286530	XM_005274778	1	1	0	1	1	4
hsa-miR-145-5p	MIMAT0000437	PAFAH1B2	5049	NM_002572	1	1	0	1	1	4
hsa-miR-145-5p	MIMAT0000437	PALM2	114299	NM_053016	1	1	0	1	1	4
hsa-miR-145-5p	MIMAT0000437	PAN2	9924	NM_001127460	1	1	0	1	1	4
hsa-miR-145-5p	MIMAT0000437	PAPD5	64282	NM_001040284	1	1	0	1	1	4
hsa-miR-145-5p	MIMAT0000437	PAPD7	11044	XM_005248234	1	1	0	1	1	4
hsa-miR-145-5p	MIMAT0000437	PAPD7	11044	NM_001171806	1	1	1	0	1	4
hsa-miR-145-5p	MIMAT0000437	PAPD7	11044	NM_001171805	1	1	1	0	1	4
hsa-miR-145-5p	MIMAT0000437	PAPD7	11044	NM_006999	1	1	1	0	1	4
hsa-miR-145-5p	MIMAT0000437	PAPPA	5069	NM_002581	1	1	0	1	1	4
hsa-miR-145-5p	MIMAT0000437	PAQR9	344838	XM_005247427	1	1	0	1	1	4
hsa-miR-145-5p	MIMAT0000437	PARP8	79668	NM_001178056	1	1	1	0	1	4
hsa-miR-145-5p	MIMAT0000437	PARP8	79668	NM_024615	1	1	1	0	1	4
hsa-miR-145-5p	MIMAT0000437	PASK	23178	NM_001252124	1	1	0	1	1	4
hsa-miR-145-5p	MIMAT0000437	PCBP2	5094	NM_001128914	1	1	1	0	1	4
hsa-miR-145-5p	MIMAT0000437	PCBP2	5094	NM_001098620	1	1	1	0	1	4
hsa-miR-145-5p	MIMAT0000437	PCBP2	5094	NM_001128913	1	1	1	0	1	4
hsa-miR-145-5p	MIMAT0000437	PCBP2	5094	NM_001128912	1	1	1	0	1	4
hsa-miR-145-5p	MIMAT0000437	PCBP2	5094	NM_031989	1	1	1	0	1	4
hsa-miR-145-5p	MIMAT0000437	PCBP2	5094	NM_001128911	1	1	1	0	1	4
hsa-miR-145-5p	MIMAT0000437	PCGF2	7703	XM_005257640	1	1	0	1	1	4
hsa-miR-145-5p	MIMAT0000437	PDCD2	5134	NM_002598	1	1	0	1	1	4
hsa-miR-145-5p	MIMAT0000437	PDCD4	27250	NM_145341	1	1	1	0	1	4
hsa-miR-145-5p	MIMAT0000437	PDCD4	27250	NM_001199492	1	1	1	0	1	4
hsa-miR-145-5p	MIMAT0000437	PDCD4	27250	NM_014456	1	1	1	0	1	4
hsa-miR-145-5p	MIMAT0000437	PDE11A	50940	NM_016953	1	1	0	1	1	4
hsa-miR-145-5p	MIMAT0000437	PDE3B	5140	NM_000922	1	1	1	0	1	4
hsa-miR-145-5p	MIMAT0000437	PDE7B	27115	XM_005266931	1	1	0	1	1	4
hsa-miR-145-5p	MIMAT0000437	PDK2	5164	NM_001199898	1	1	0	1	1	4
hsa-miR-145-5p	MIMAT0000437	PDPR	55066	XM_005256016	1	1	0	1	1	4
hsa-miR-145-5p	MIMAT0000437	PDXK	8566	NM_003681	1	1	0	1	1	4
hsa-miR-145-5p	MIMAT0000437	PEAK1	79834	XM_005254672	1	1	0	1	1	4
hsa-miR-145-5p	MIMAT0000437	PEX2	5828	NM_000318	1	1	0	1	1	4
hsa-miR-145-5p	MIMAT0000437	PEX5L	51555	NM_016559	1	1	0	1	1	4
hsa-miR-145-5p	MIMAT0000437	PGM3	5238	NM_001199917	1	1	0	1	1	4
hsa-miR-145-5p	MIMAT0000437	PGM3	5238	NM_001199918	1	1	1	0	1	4
hsa-miR-145-5p	MIMAT0000437	PHACTR2	9749	NM_001100164	1	1	0	1	1	4
hsa-miR-145-5p	MIMAT0000437	PHEX	5251	NM_000444	1	1	0	1	1	4
hsa-miR-145-5p	MIMAT0000437	PHF17	79960	NM_024900	1	1	1	0	1	4
hsa-miR-145-5p	MIMAT0000437	PHF20L1	51105	NM_016018	1	1	1	0	1	4
hsa-miR-145-5p	MIMAT0000437	PHKB	5257	NM_001031835	1	1	1	0	1	4
hsa-miR-145-5p	MIMAT0000437	PHKB	5257	NM_000293	1	1	1	0	1	4
hsa-miR-145-5p	MIMAT0000437	PHOX2B	8929	NM_003924	1	1	0	1	1	4
hsa-miR-145-5p	MIMAT0000437	PHRF1	57661	NM_020901	1	1	1	0	1	4
hsa-miR-145-5p	MIMAT0000437	PHTF1	10745	NM_006608	1	1	1	0	1	4
hsa-miR-145-5p	MIMAT0000437	PI4K2A	55361	NM_018425	1	1	0	1	1	4
hsa-miR-145-5p	MIMAT0000437	PIK3C2B	5287	XM_005245260	1	1	0	1	1	4
hsa-miR-145-5p	MIMAT0000437	PIKFYVE	200576	NM_015040	1	1	0	1	1	4
hsa-miR-145-5p	MIMAT0000437	PKHD1	5314	NM_138694	1	1	0	1	1	4
hsa-miR-145-5p	MIMAT0000437	PLA2G4A	5321	NM_024420	1	1	0	1	1	4
hsa-miR-145-5p	MIMAT0000437	PLA2R1	22925	NM_007366	0	1	1	1	1	4
hsa-miR-145-5p	MIMAT0000437	PLAG1	5324	NM_002655	1	1	0	1	1	4
hsa-miR-145-5p	MIMAT0000437	PLAGL2	5326	XM_005260436	1	1	0	1	1	4
hsa-miR-145-5p	MIMAT0000437	PLCL2	23228	NM_015184	1	1	1	0	1	4
hsa-miR-145-5p	MIMAT0000437	PLOD1	5351	XM_005263474	1	1	0	1	1	4
hsa-miR-145-5p	MIMAT0000437	PLOD1	5351	NM_000302	1	1	1	0	1	4
hsa-miR-145-5p	MIMAT0000437	PLXNA2	5362	NM_025179	1	1	0	1	1	4
hsa-miR-145-5p	MIMAT0000437	PLXNA4	91584	NM_001105543	1	1	1	0	1	4
hsa-miR-145-5p	MIMAT0000437	PMAIP1	5366	XM_005266710	1	1	0	1	1	4
hsa-miR-145-5p	MIMAT0000437	PMM2	5373	NM_000303	1	1	0	1	1	4
hsa-miR-145-5p	MIMAT0000437	PNMA3	29944	NM_013364	1	1	0	1	1	4
hsa-miR-145-5p	MIMAT0000437	POMT2	29954	NM_013382	1	1	0	1	1	4
hsa-miR-145-5p	MIMAT0000437	PPCDC	60490	NM_021823	1	1	0	1	1	4
hsa-miR-145-5p	MIMAT0000437	PPFIA3	8541	NM_003660	1	1	0	1	1	4
hsa-miR-145-5p	MIMAT0000437	PPM1A	5494	XM_005267777	1	1	0	1	1	4
hsa-miR-145-5p	MIMAT0000437	PPM1A	5494	NM_177952	1	1	1	0	1	4
hsa-miR-145-5p	MIMAT0000437	PPM1A	5494	NM_021003	1	1	1	0	1	4
hsa-miR-145-5p	MIMAT0000437	PPP2R3A	5523	NM_001190447	1	1	1	0	1	4
hsa-miR-145-5p	MIMAT0000437	PPP2R3A	5523	NM_181897	1	1	1	0	1	4
hsa-miR-145-5p	MIMAT0000437	PPP3CA	5530	NM_000944	1	1	1	0	1	4
hsa-miR-145-5p	MIMAT0000437	PPP3CA	5530	NM_001130692	1	1	1	0	1	4
hsa-miR-145-5p	MIMAT0000437	PPP3CA	5530	NM_001130691	1	1	1	0	1	4
hsa-miR-145-5p	MIMAT0000437	PRCP	5547	NM_005040	1	1	1	0	1	4
hsa-miR-145-5p	MIMAT0000437	PRDM15	63977	NM_001040424	1	1	0	1	1	4
hsa-miR-145-5p	MIMAT0000437	PRDM2	7799	NM_001135610	1	1	1	0	1	4
hsa-miR-145-5p	MIMAT0000437	PRKD3	23683	XM_005264237	1	1	0	1	1	4
hsa-miR-145-5p	MIMAT0000437	PRKD3	23683	NM_005813	1	1	1	0	1	4
hsa-miR-145-5p	MIMAT0000437	PRKDC	5591	NM_006904	1	1	1	0	1	4
hsa-miR-145-5p	MIMAT0000437	PRKDC	5591	NM_001081640	1	1	1	0	1	4
hsa-miR-145-5p	MIMAT0000437	PRKX	5613	NM_005044	1	1	1	0	1	4
hsa-miR-145-5p	MIMAT0000437	PRLR	5618	NM_001204314	1	1	1	0	1	4
hsa-miR-145-5p	MIMAT0000437	PROSER2	254427	NM_153256	1	1	0	1	1	4
hsa-miR-145-5p	MIMAT0000437	PRPF38A	84950	NM_032864	1	1	0	1	1	4
hsa-miR-145-5p	MIMAT0000437	PRRC2C	23215	XM_005245020	1	1	0	1	1	4
hsa-miR-145-5p	MIMAT0000437	PRRG1	5638	NM_001173489	1	1	0	1	1	4
hsa-miR-145-5p	MIMAT0000437	PSD3	23362	NM_015310	1	1	0	1	1	4
hsa-miR-145-5p	MIMAT0000437	PTBP3	9991	NM_001244898	1	1	0	1	1	4
hsa-miR-145-5p	MIMAT0000437	PTCHD4	442213	NM_207499	1	1	1	0	1	4
hsa-miR-145-5p	MIMAT0000437	PTGFR	5737	NM_000959	1	1	1	0	1	4
hsa-miR-145-5p	MIMAT0000437	PTGR2	145482	NM_001146154	1	1	1	0	1	4
hsa-miR-145-5p	MIMAT0000437	PTGR2	145482	NM_001146155	1	1	1	0	1	4
hsa-miR-145-5p	MIMAT0000437	PTP4A2	8073	NM_001195101	1	1	1	0	1	4
hsa-miR-145-5p	MIMAT0000437	PTP4A2	8073	NM_001195100	1	1	1	0	1	4
hsa-miR-145-5p	MIMAT0000437	PTPN22	26191	NM_015967	1	1	1	0	1	4
hsa-miR-145-5p	MIMAT0000437	PTPN22	26191	NM_012411	1	1	1	0	1	4
hsa-miR-145-5p	MIMAT0000437	PTPN22	26191	NM_001193431	1	1	1	0	1	4
hsa-miR-145-5p	MIMAT0000437	PURB	5814	NM_033224	1	1	0	1	1	4
hsa-miR-145-5p	MIMAT0000437	PVR	5817	NM_001135769	1	1	1	0	1	4
hsa-miR-145-5p	MIMAT0000437	PVR	5817	NM_001135768	1	1	1	0	1	4
hsa-miR-145-5p	MIMAT0000437	PVRL3	25945	NM_015480	1	1	1	0	1	4
hsa-miR-145-5p	MIMAT0000437	PVRL3	25945	NM_001243286	1	1	1	0	1	4
hsa-miR-145-5p	MIMAT0000437	PXN	5829	XM_005253910	1	1	0	1	1	4
hsa-miR-145-5p	MIMAT0000437	PXN	5829	NM_002859	1	1	1	0	1	4
hsa-miR-145-5p	MIMAT0000437	PXN	5829	NM_001080855	1	1	1	0	1	4
hsa-miR-145-5p	MIMAT0000437	PXN	5829	NM_025157	1	1	1	0	1	4
hsa-miR-145-5p	MIMAT0000437	PXN	5829	NM_001243756	1	1	1	0	1	4
hsa-miR-145-5p	MIMAT0000437	PYROXD1	79912	NM_024854	1	1	1	0	1	4
hsa-miR-145-5p	MIMAT0000437	QKI	9444	NM_006775	1	1	1	0	1	4
hsa-miR-145-5p	MIMAT0000437	QKI	9444	NM_206853	1	1	1	0	1	4
hsa-miR-145-5p	MIMAT0000437	QKI	9444	NM_206854	1	1	1	0	1	4
hsa-miR-145-5p	MIMAT0000437	QSER1	79832	NM_001076786	1	1	0	1	1	4
hsa-miR-145-5p	MIMAT0000437	RAB11A	8766	NM_001206836	1	1	1	0	1	4
hsa-miR-145-5p	MIMAT0000437	RAB14	51552	NM_016322	1	1	0	1	1	4
hsa-miR-145-5p	MIMAT0000437	RAB18	22931	NM_001256410	1	1	0	1	1	4
hsa-miR-145-5p	MIMAT0000437	RAB23	51715	NM_016277	1	1	0	1	1	4
hsa-miR-145-5p	MIMAT0000437	RAB3IP	117177	NM_175623	1	1	1	0	1	4
hsa-miR-145-5p	MIMAT0000437	RAB3IP	117177	NM_001024647	1	1	1	0	1	4
hsa-miR-145-5p	MIMAT0000437	RAB3IP	117177	NM_175624	1	1	1	0	1	4
hsa-miR-145-5p	MIMAT0000437	RAB3IP	117177	NM_022456	1	1	1	0	1	4
hsa-miR-145-5p	MIMAT0000437	RAB3IP	117177	NM_175625	1	1	1	0	1	4
hsa-miR-145-5p	MIMAT0000437	RABL3	285282	NM_173825	1	1	0	1	1	4
hsa-miR-145-5p	MIMAT0000437	RAD23B	5887	NM_001244724	1	1	1	0	1	4
hsa-miR-145-5p	MIMAT0000437	RAD23B	5887	NM_001244713	1	1	1	0	1	4
hsa-miR-145-5p	MIMAT0000437	RAD51B	5890	NM_133509	1	1	1	0	1	4
hsa-miR-145-5p	MIMAT0000437	RANBP2	5903	NM_006267	1	1	1	0	1	4
hsa-miR-145-5p	MIMAT0000437	RAP2A	5911	NM_021033	1	1	0	1	1	4
hsa-miR-145-5p	MIMAT0000437	RAP2B	5912	NM_002886	1	1	0	1	1	4
hsa-miR-145-5p	MIMAT0000437	RAPGEF2	9693	XM_005263358	1	1	0	1	1	4
hsa-miR-145-5p	MIMAT0000437	RAPGEF2	9693	NM_014247	1	1	1	0	1	4
hsa-miR-145-5p	MIMAT0000437	RAPH1	65059	NM_213589	1	1	0	1	1	4
hsa-miR-145-5p	MIMAT0000437	RASA1	5921	NM_002890	1	1	1	0	1	4
hsa-miR-145-5p	MIMAT0000437	RASA1	5921	NM_022650	1	1	1	0	1	4
hsa-miR-145-5p	MIMAT0000437	RASA2	5922	XM_005247687	1	1	0	1	1	4
hsa-miR-145-5p	MIMAT0000437	RASAL1	8437	NM_004658	1	1	0	1	1	4
hsa-miR-145-5p	MIMAT0000437	RASAL2	9462	NM_170692	1	1	0	1	1	4
hsa-miR-145-5p	MIMAT0000437	RASGEF1C	255426	NM_175062	1	1	0	1	1	4
hsa-miR-145-5p	MIMAT0000437	RASGRF1	5923	NM_002891	1	1	0	1	1	4
hsa-miR-145-5p	MIMAT0000437	RASGRF2	5924	NM_006909	1	1	0	1	1	4
hsa-miR-145-5p	MIMAT0000437	RASSF6	166824	NM_177532	1	1	0	1	1	4
hsa-miR-145-5p	MIMAT0000437	RBAK	57786	NM_021163	1	1	0	1	1	4
hsa-miR-145-5p	MIMAT0000437	RBM18	92400	NM_033117	1	1	0	1	1	4
hsa-miR-145-5p	MIMAT0000437	RBM20	282996	NM_001134363	1	1	0	1	1	4
hsa-miR-145-5p	MIMAT0000437	RBM47	54502	NM_001098634	1	1	0	1	1	4
hsa-miR-145-5p	MIMAT0000437	RBM4B	83759	NM_031492	1	1	0	1	1	4
hsa-miR-145-5p	MIMAT0000437	RBPMS	11030	XM_005273387	1	1	0	1	1	4
hsa-miR-145-5p	MIMAT0000437	RBPMS2	348093	NM_194272	0	1	1	1	1	4
hsa-miR-145-5p	MIMAT0000437	RC3H1	149041	NM_172071	1	1	0	1	1	4
hsa-miR-145-5p	MIMAT0000437	RCAN3	11123	NM_013441	1	1	1	0	1	4
hsa-miR-145-5p	MIMAT0000437	RCAN3	11123	NM_001251985	1	1	1	0	1	4
hsa-miR-145-5p	MIMAT0000437	RCAN3	11123	NM_001251982	1	1	1	0	1	4
hsa-miR-145-5p	MIMAT0000437	RCAN3	11123	NM_001251984	1	1	1	0	1	4
hsa-miR-145-5p	MIMAT0000437	RCAN3	11123	NM_001251980	1	1	1	0	1	4
hsa-miR-145-5p	MIMAT0000437	RCAN3	11123	NM_001251983	1	1	1	0	1	4
hsa-miR-145-5p	MIMAT0000437	RCAN3	11123	NM_001251981	1	1	1	0	1	4
hsa-miR-145-5p	MIMAT0000437	RCAN3	11123	NM_001251979	1	1	1	0	1	4
hsa-miR-145-5p	MIMAT0000437	RCAN3	11123	NM_001251978	1	1	1	0	1	4
hsa-miR-145-5p	MIMAT0000437	RCAN3	11123	NM_001251977	1	1	1	0	1	4
hsa-miR-145-5p	MIMAT0000437	REEP1	65055	XM_005264502	1	1	0	1	1	4
hsa-miR-145-5p	MIMAT0000437	REEP1	65055	NM_001164732	1	1	1	0	1	4
hsa-miR-145-5p	MIMAT0000437	REEP1	65055	NM_001164730	1	1	1	0	1	4
hsa-miR-145-5p	MIMAT0000437	REEP1	65055	NM_001164731	1	1	1	0	1	4
hsa-miR-145-5p	MIMAT0000437	REEP1	65055	NM_022912	1	1	1	0	1	4
hsa-miR-145-5p	MIMAT0000437	REV3L	5980	NM_002912	1	1	1	0	1	4
hsa-miR-145-5p	MIMAT0000437	REXO1L1	254958	XM_005251207	1	1	0	1	1	4
hsa-miR-145-5p	MIMAT0000437	RFX2	5990	NM_000635	1	1	0	1	1	4
hsa-miR-145-5p	MIMAT0000437	RFX3	5991	NM_134428	1	1	0	1	1	4
hsa-miR-145-5p	MIMAT0000437	RFX4	5992	NM_213594	1	1	0	1	1	4
hsa-miR-145-5p	MIMAT0000437	RGPD5	84220	XM_005263819	1	1	0	1	1	4
hsa-miR-145-5p	MIMAT0000437	RGPD6	729540	NM_001123363	1	1	0	1	1	4
hsa-miR-145-5p	MIMAT0000437	RGS7	6000	NM_002924	1	1	1	0	1	4
hsa-miR-145-5p	MIMAT0000437	RILPL1	353116	NM_178314	1	1	1	0	1	4
hsa-miR-145-5p	MIMAT0000437	RIMKLB	57494	XM_005253436	1	1	0	1	1	4
hsa-miR-145-5p	MIMAT0000437	RIMS3	9783	NM_014747	1	1	0	1	1	4
hsa-miR-145-5p	MIMAT0000437	RNF157	114804	NM_052916	1	1	0	1	1	4
hsa-miR-145-5p	MIMAT0000437	RNF169	254225	NM_001098638	1	1	0	1	1	4
hsa-miR-145-5p	MIMAT0000437	RNF170	81790	NM_001160225	1	1	1	0	1	4
hsa-miR-145-5p	MIMAT0000437	RNF170	81790	NM_030954	1	1	1	0	1	4
hsa-miR-145-5p	MIMAT0000437	RNF186	54546	NM_019062	1	1	1	0	1	4
hsa-miR-145-5p	MIMAT0000437	RNF207	388591	NM_207396	0	1	1	1	1	4
hsa-miR-145-5p	MIMAT0000437	RNF213	57674	NM_001256071	1	1	0	1	1	4
hsa-miR-145-5p	MIMAT0000437	RNF216	54476	NM_207116	1	1	1	0	1	4
hsa-miR-145-5p	MIMAT0000437	RNF24	11237	NM_007219	1	1	0	1	1	4
hsa-miR-145-5p	MIMAT0000437	RPA1	6117	NM_002945	1	1	0	1	1	4
hsa-miR-145-5p	MIMAT0000437	RPL32	6161	NM_001007074	1	1	0	1	1	4
hsa-miR-145-5p	MIMAT0000437	RPS6KA3	6197	XM_005274574	1	1	0	1	1	4
hsa-miR-145-5p	MIMAT0000437	RPS6KB1	6198	NM_001272044	1	1	0	1	1	4
hsa-miR-145-5p	MIMAT0000437	RREB1	6239	NM_001003700	1	1	1	0	1	4
hsa-miR-145-5p	MIMAT0000437	RREB1	6239	NM_001168344	1	1	1	0	1	4
hsa-miR-145-5p	MIMAT0000437	RREB1	6239	NM_001003698	1	1	1	0	1	4
hsa-miR-145-5p	MIMAT0000437	RREB1	6239	NM_001003699	1	1	1	0	1	4
hsa-miR-145-5p	MIMAT0000437	RTKN	6242	NM_001015055	1	1	1	0	1	4
hsa-miR-145-5p	MIMAT0000437	RTKN	6242	NM_001015056	1	1	1	0	1	4
hsa-miR-145-5p	MIMAT0000437	RUNX3	864	NM_001031680	1	1	0	1	1	4
hsa-miR-145-5p	MIMAT0000437	SAMD12	401474	NM_001101676	1	1	1	0	1	4
hsa-miR-145-5p	MIMAT0000437	SAMD8	142891	NM_144660	1	1	0	1	1	4
hsa-miR-145-5p	MIMAT0000437	SBF2	81846	NM_030962	0	1	1	1	1	4
hsa-miR-145-5p	MIMAT0000437	SCARB2	950	NM_005506	1	1	0	1	1	4
hsa-miR-145-5p	MIMAT0000437	SCN2A	6326	NM_021007	1	1	1	0	1	4
hsa-miR-145-5p	MIMAT0000437	SCN2A	6326	NM_001040143	1	1	1	0	1	4
hsa-miR-145-5p	MIMAT0000437	SCN2A	6326	NM_001040142	1	1	1	0	1	4
hsa-miR-145-5p	MIMAT0000437	SCN3A	6328	NM_006922	1	1	0	1	1	4
hsa-miR-145-5p	MIMAT0000437	SCN3B	55800	NM_001040151	1	1	1	0	1	4
hsa-miR-145-5p	MIMAT0000437	SCUBE3	222663	XM_005248943	1	1	0	1	1	4
hsa-miR-145-5p	MIMAT0000437	SEC22C	9117	XM_005265532	1	1	0	1	1	4
hsa-miR-145-5p	MIMAT0000437	SEMA3A	10371	XM_005250110	1	1	0	1	1	4
hsa-miR-145-5p	MIMAT0000437	SEMA3A	10371	NM_006080	1	1	1	0	1	4
hsa-miR-145-5p	MIMAT0000437	SEMA4B	10509	XM_005254830	1	1	0	1	1	4
hsa-miR-145-5p	MIMAT0000437	SEMA5A	9037	NM_003966	1	1	0	1	1	4
hsa-miR-145-5p	MIMAT0000437	SEMA6A	57556	XM_005272041	1	1	0	1	1	4
hsa-miR-145-5p	MIMAT0000437	SEMA6A	57556	NM_020796	1	1	1	0	1	4
hsa-miR-145-5p	MIMAT0000437	SENP1	29843	NM_001267595	1	1	0	1	1	4
hsa-miR-145-5p	MIMAT0000437	SEPHS1	22929	NM_012247	1	1	0	1	1	4
hsa-miR-145-5p	MIMAT0000437	SERAC1	84947	NM_032861	1	1	0	1	1	4
hsa-miR-145-5p	MIMAT0000437	SERBP1	26135	NM_001018067	1	1	0	1	1	4
hsa-miR-145-5p	MIMAT0000437	SERINC5	256987	NM_001174072	1	1	1	0	1	4
hsa-miR-145-5p	MIMAT0000437	SERP1	27230	NM_014445	1	1	1	0	1	4
hsa-miR-145-5p	MIMAT0000437	SERPINE1	5054	NM_000602	1	1	0	1	1	4
hsa-miR-145-5p	MIMAT0000437	SERTAD2	9792	XM_005264669	1	1	0	1	1	4
hsa-miR-145-5p	MIMAT0000437	SFMBT1	51460	XM_005265220	1	1	0	1	1	4
hsa-miR-145-5p	MIMAT0000437	SFN	2810	NM_006142	1	1	0	1	1	4
hsa-miR-145-5p	MIMAT0000437	SH2B3	10019	NM_005475	1	1	1	0	1	4
hsa-miR-145-5p	MIMAT0000437	SH3BP2	6452	NM_001145855	1	1	0	1	1	4
hsa-miR-145-5p	MIMAT0000437	SH3BP5L	80851	NM_030645	1	1	0	1	1	4
hsa-miR-145-5p	MIMAT0000437	SH3KBP1	30011	NM_031892	1	1	0	1	1	4
hsa-miR-145-5p	MIMAT0000437	SH3PXD2A	9644	XM_005270294	1	1	0	1	1	4
hsa-miR-145-5p	MIMAT0000437	SH3PXD2A	9644	NM_014631	1	1	1	0	1	4
hsa-miR-145-5p	MIMAT0000437	SHANK2	22941	NM_012309	1	1	0	1	1	4
hsa-miR-145-5p	MIMAT0000437	SHISA3	152573	NM_001080505	1	1	1	0	1	4
hsa-miR-145-5p	MIMAT0000437	SHISA9	729993	NM_001145204	1	1	0	1	1	4
hsa-miR-145-5p	MIMAT0000437	SHROOM3	57619	NM_020859	1	1	0	1	1	4
hsa-miR-145-5p	MIMAT0000437	SIKE1	80143	NM_001102396	1	1	0	1	1	4
hsa-miR-145-5p	MIMAT0000437	SIRT3	23410	NM_012239	1	1	0	1	1	4
hsa-miR-145-5p	MIMAT0000437	SIRT5	23408	NM_031244	1	1	1	0	1	4
hsa-miR-145-5p	MIMAT0000437	SKAP2	8935	NM_003930	1	1	1	0	1	4
hsa-miR-145-5p	MIMAT0000437	SKP1	6500	NM_170679	1	1	1	0	1	4
hsa-miR-145-5p	MIMAT0000437	SLA	6503	NM_001045556	1	1	0	1	1	4
hsa-miR-145-5p	MIMAT0000437	SLAMF1	6504	NM_003037	1	1	0	1	1	4
hsa-miR-145-5p	MIMAT0000437	SLC10A7	84068	XM_005263276	1	1	0	1	1	4
hsa-miR-145-5p	MIMAT0000437	SLC11A1	6556	NM_000578	1	1	0	1	1	4
hsa-miR-145-5p	MIMAT0000437	SLC11A2	4891	NM_001174129	1	1	0	1	1	4
hsa-miR-145-5p	MIMAT0000437	SLC13A3	64849	XM_005260513	1	1	0	1	1	4
hsa-miR-145-5p	MIMAT0000437	SLC17A5	26503	XM_005248711	1	1	0	1	1	4
hsa-miR-145-5p	MIMAT0000437	SLC19A3	80704	XM_005246871	1	1	0	1	1	4
hsa-miR-145-5p	MIMAT0000437	SLC1A2	6506	NM_001195728	1	1	1	0	1	4
hsa-miR-145-5p	MIMAT0000437	SLC1A4	6509	NM_003038	1	1	0	1	1	4
hsa-miR-145-5p	MIMAT0000437	SLC22A5	6584	XM_005272055	1	1	0	1	1	4
hsa-miR-145-5p	MIMAT0000437	SLC24A4	123041	NM_153648	1	1	1	0	1	4
hsa-miR-145-5p	MIMAT0000437	SLC24A4	123041	NM_153646	1	1	1	0	1	4
hsa-miR-145-5p	MIMAT0000437	SLC24A4	123041	NM_153647	1	1	1	0	1	4
hsa-miR-145-5p	MIMAT0000437	SLC25A11	8402	NM_001165418	1	1	1	0	1	4
hsa-miR-145-5p	MIMAT0000437	SLC25A11	8402	NM_001165417	1	1	1	0	1	4
hsa-miR-145-5p	MIMAT0000437	SLC25A17	10478	XM_005261306	1	1	0	1	1	4
hsa-miR-145-5p	MIMAT0000437	SLC25A20	788	NM_000387	1	1	0	1	1	4
hsa-miR-145-5p	MIMAT0000437	SLC25A31	83447	NM_031291	1	1	1	0	1	4
hsa-miR-145-5p	MIMAT0000437	SLC25A46	91137	XM_005272126	1	1	0	1	1	4
hsa-miR-145-5p	MIMAT0000437	SLC26A9	115019	NM_052934	0	1	1	1	1	4
hsa-miR-145-5p	MIMAT0000437	SLC2A13	114134	XM_005268615	1	1	0	1	1	4
hsa-miR-145-5p	MIMAT0000437	SLC35B4	84912	NM_032826	1	1	0	1	1	4
hsa-miR-145-5p	MIMAT0000437	SLC35D1	23169	NM_015139	1	1	0	1	1	4
hsa-miR-145-5p	MIMAT0000437	SLC35F2	54733	NM_017515	1	1	0	1	1	4
hsa-miR-145-5p	MIMAT0000437	SLC41A1	254428	NM_173854	1	1	0	1	1	4
hsa-miR-145-5p	MIMAT0000437	SLC4A10	57282	NM_001178016	1	1	0	1	1	4
hsa-miR-145-5p	MIMAT0000437	SLC4A4	8671	XM_005265704	1	1	0	1	1	4
hsa-miR-145-5p	MIMAT0000437	SLC4A5	57835	NM_133478	1	1	1	0	1	4
hsa-miR-145-5p	MIMAT0000437	SLC5A3	6526	NM_006933	1	1	0	1	1	4
hsa-miR-145-5p	MIMAT0000437	SLC6A15	55117	NM_182767	1	1	0	1	1	4
hsa-miR-145-5p	MIMAT0000437	SLC6A4	6532	NM_001045	1	1	0	1	1	4
hsa-miR-145-5p	MIMAT0000437	SLC7A2	6542	NM_001008539	1	1	0	1	1	4
hsa-miR-145-5p	MIMAT0000437	SLC7A8	23428	NM_182728	1	1	1	0	1	4
hsa-miR-145-5p	MIMAT0000437	SLC8A3	6547	NM_183002	1	1	1	0	1	4
hsa-miR-145-5p	MIMAT0000437	SLC8A3	6547	NM_182936	1	1	1	0	1	4
hsa-miR-145-5p	MIMAT0000437	SLC8A3	6547	NM_001130417	1	1	1	0	1	4
hsa-miR-145-5p	MIMAT0000437	SLC8A3	6547	NM_182932	1	1	1	0	1	4
hsa-miR-145-5p	MIMAT0000437	SLC8A3	6547	NM_058240	1	1	1	0	1	4
hsa-miR-145-5p	MIMAT0000437	SLC8A3	6547	NM_033262	1	1	1	0	1	4
hsa-miR-145-5p	MIMAT0000437	SLIT3	6586	NM_001271946	1	1	0	1	1	4
hsa-miR-145-5p	MIMAT0000437	SLITRK4	139065	NM_001184749	1	1	0	1	1	4
hsa-miR-145-5p	MIMAT0000437	SLMO2	51012	NM_016045	1	1	1	0	1	4
hsa-miR-145-5p	MIMAT0000437	SLN	6588	NM_003063	1	1	1	0	1	4
hsa-miR-145-5p	MIMAT0000437	SMAD2	4087	NM_005901	1	1	1	0	1	4
hsa-miR-145-5p	MIMAT0000437	SMAD2	4087	NM_001135937	1	1	1	0	1	4
hsa-miR-145-5p	MIMAT0000437	SMAD4	4089	NM_005359	1	1	0	1	1	4
hsa-miR-145-5p	MIMAT0000437	SMAD5	4090	NM_001001420	1	1	1	0	1	4
hsa-miR-145-5p	MIMAT0000437	SMAD5	4090	NM_005903	1	1	1	0	1	4
hsa-miR-145-5p	MIMAT0000437	SMARCA5	8467	NM_003601	1	1	0	1	1	4
hsa-miR-145-5p	MIMAT0000437	SMC1A	8243	NM_001281463	1	1	0	1	1	4
hsa-miR-145-5p	MIMAT0000437	SMC2	10592	NM_001042550	1	1	0	1	1	4
hsa-miR-145-5p	MIMAT0000437	SMC6	79677	XM_005262627	1	1	0	1	1	4
hsa-miR-145-5p	MIMAT0000437	SMC6	79677	NM_024624	1	1	1	0	1	4
hsa-miR-145-5p	MIMAT0000437	SMC6	79677	NM_001142286	1	1	1	0	1	4
hsa-miR-145-5p	MIMAT0000437	SMCHD1	23347	NM_015295	1	1	1	0	1	4
hsa-miR-145-5p	MIMAT0000437	SMIM18	100507341	NM_001206847	1	1	1	0	1	4
hsa-miR-145-5p	MIMAT0000437	SNED1	25992	NM_001080437	1	1	0	1	1	4
hsa-miR-145-5p	MIMAT0000437	SNX15	29907	NM_013306	1	1	0	1	1	4
hsa-miR-145-5p	MIMAT0000437	SNX27	81609	XM_005245511	1	1	0	1	1	4
hsa-miR-145-5p	MIMAT0000437	SNX27	81609	NM_030918	1	1	1	0	1	4
hsa-miR-145-5p	MIMAT0000437	SNX30	401548	NM_001012994	1	1	0	1	1	4
hsa-miR-145-5p	MIMAT0000437	SOAT1	6646	NM_003101	1	1	0	1	1	4
hsa-miR-145-5p	MIMAT0000437	SOCS7	30837	NM_014598	1	1	1	0	1	4
hsa-miR-145-5p	MIMAT0000437	SORBS1	10580	XM_005269403	1	1	0	1	1	4
hsa-miR-145-5p	MIMAT0000437	SORT1	6272	XM_005271102	1	1	0	1	1	4
hsa-miR-145-5p	MIMAT0000437	SOX4	6659	NM_003107	1	1	0	1	1	4
hsa-miR-145-5p	MIMAT0000437	SOX9	6662	NM_000346	1	1	1	0	1	4
hsa-miR-145-5p	MIMAT0000437	SPAG17	200162	NM_206996	0	1	1	1	1	4
hsa-miR-145-5p	MIMAT0000437	SPECC1	92521	NM_152904	1	1	0	1	1	4
hsa-miR-145-5p	MIMAT0000437	SPOP	8405	NM_001007226	1	1	1	0	1	4
hsa-miR-145-5p	MIMAT0000437	SPOP	8405	NM_001007228	1	1	1	0	1	4
hsa-miR-145-5p	MIMAT0000437	SPOP	8405	NM_001007229	1	1	1	0	1	4
hsa-miR-145-5p	MIMAT0000437	SPOP	8405	NM_001007227	1	1	1	0	1	4
hsa-miR-145-5p	MIMAT0000437	SPOP	8405	NM_001007230	1	1	1	0	1	4
hsa-miR-145-5p	MIMAT0000437	SPOP	8405	NM_003563	1	1	1	0	1	4
hsa-miR-145-5p	MIMAT0000437	SPRY4	81848	XM_005268517	1	1	0	1	1	4
hsa-miR-145-5p	MIMAT0000437	SPSB4	92369	NM_080862	0	1	1	1	1	4
hsa-miR-145-5p	MIMAT0000437	SPTLC1	10558	NM_006415	1	1	1	0	1	4
hsa-miR-145-5p	MIMAT0000437	SRGAP1	57522	NM_020762	1	1	1	0	1	4
hsa-miR-145-5p	MIMAT0000437	SRGAP2	23380	XM_005277510	1	1	0	1	1	4
hsa-miR-145-5p	MIMAT0000437	SRGAP2	23380	NM_001170637	1	1	1	0	1	4
hsa-miR-145-5p	MIMAT0000437	SRGAP2	23380	NM_015326	1	1	1	0	1	4
hsa-miR-145-5p	MIMAT0000437	SRI	6717	NM_003130	1	1	0	1	1	4
hsa-miR-145-5p	MIMAT0000437	SRP9	6726	NM_003133	1	1	1	0	1	4
hsa-miR-145-5p	MIMAT0000437	SRSF12	135295	NM_080743	0	1	1	1	1	4
hsa-miR-145-5p	MIMAT0000437	SS18	6760	XM_005258335	1	1	0	1	1	4
hsa-miR-145-5p	MIMAT0000437	SSH2	85464	XM_005258058	1	1	0	1	1	4
hsa-miR-145-5p	MIMAT0000437	SSH2	85464	XM_005258059	1	1	0	1	1	4
hsa-miR-145-5p	MIMAT0000437	SSH2	85464	NM_033389	1	1	1	0	1	4
hsa-miR-145-5p	MIMAT0000437	ST3GAL1	6482	XM_005251023	1	1	0	1	1	4
hsa-miR-145-5p	MIMAT0000437	ST8SIA3	51046	NM_015879	1	1	0	1	1	4
hsa-miR-145-5p	MIMAT0000437	STC1	6781	NM_003155	1	1	0	1	1	4
hsa-miR-145-5p	MIMAT0000437	STEAP2	261729	NM_001244944	1	1	0	1	1	4
hsa-miR-145-5p	MIMAT0000437	STS	412	XM_005274512	1	1	0	1	1	4
hsa-miR-145-5p	MIMAT0000437	STX12	23673	NM_177424	1	1	0	1	1	4
hsa-miR-145-5p	MIMAT0000437	SUPT7L	9913	NM_014860	1	1	0	1	1	4
hsa-miR-145-5p	MIMAT0000437	SVEP1	79987	NM_153366	1	1	0	1	1	4
hsa-miR-145-5p	MIMAT0000437	SYNJ1	8867	NM_001160302	1	1	1	0	1	4
hsa-miR-145-5p	MIMAT0000437	SYNJ2BP-COX16	100529257	NM_001202547	1	1	1	0	1	4
hsa-miR-145-5p	MIMAT0000437	SYNJ2BP-COX16	100529257	NM_001202549	1	1	1	0	1	4
hsa-miR-145-5p	MIMAT0000437	SYNJ2BP-COX16	100529257	NM_001202548	1	1	1	0	1	4
hsa-miR-145-5p	MIMAT0000437	SYPL2	284612	NM_001040709	1	1	0	1	1	4
hsa-miR-145-5p	MIMAT0000437	SYT1	6857	NM_001135805	1	1	0	1	1	4
hsa-miR-145-5p	MIMAT0000437	SYT16	83851	XM_005268123	1	1	0	1	1	4
hsa-miR-145-5p	MIMAT0000437	TAT	6898	NM_000353	1	1	1	0	1	4
hsa-miR-145-5p	MIMAT0000437	TATDN2	9797	NM_014760	1	1	0	1	1	4
hsa-miR-145-5p	MIMAT0000437	TBC1D12	23232	NM_015188	1	1	1	0	1	4
hsa-miR-145-5p	MIMAT0000437	TBC1D15	64786	NM_001146214	0	1	1	1	1	4
hsa-miR-145-5p	MIMAT0000437	TBC1D23	55773	NM_001199198	1	1	1	0	1	4
hsa-miR-145-5p	MIMAT0000437	TBC1D23	55773	NM_018309	1	1	1	0	1	4
hsa-miR-145-5p	MIMAT0000437	TBC1D2B	23102	NM_144572	1	1	0	1	1	4
hsa-miR-145-5p	MIMAT0000437	TBPL1	9519	NM_001253676	1	1	0	1	1	4
hsa-miR-145-5p	MIMAT0000437	TCEB3	6924	NM_003198	1	1	0	1	1	4
hsa-miR-145-5p	MIMAT0000437	TEAD1	7003	NM_021961	1	1	0	1	1	4
hsa-miR-145-5p	MIMAT0000437	TEX37	200523	XM_005264188	1	1	0	1	1	4
hsa-miR-145-5p	MIMAT0000437	TEX37	200523	NM_152670	1	1	1	0	1	4
hsa-miR-145-5p	MIMAT0000437	TFEC	22797	XM_005250231	1	1	0	1	1	4
hsa-miR-145-5p	MIMAT0000437	TGFBR1	7046	NM_001130916	1	1	1	0	1	4
hsa-miR-145-5p	MIMAT0000437	TGFBR2	7048	NM_003242	1	1	1	0	1	4
hsa-miR-145-5p	MIMAT0000437	TGFBRAP1	9392	XM_005264042	1	1	0	1	1	4
hsa-miR-145-5p	MIMAT0000437	THPO	7066	XM_005247737	1	1	0	1	1	4
hsa-miR-145-5p	MIMAT0000437	THRAP3	9967	XM_005271370	1	1	0	1	1	4
hsa-miR-145-5p	MIMAT0000437	TIRAP	114609	NM_001039661	1	1	0	1	1	4
hsa-miR-145-5p	MIMAT0000437	TJP1	7082	NM_003257	1	1	1	0	1	4
hsa-miR-145-5p	MIMAT0000437	TJP1	7082	NM_175610	1	1	1	0	1	4
hsa-miR-145-5p	MIMAT0000437	TLL1	7092	XM_005263191	1	1	0	1	1	4
hsa-miR-145-5p	MIMAT0000437	TLL1	7092	NM_012464	1	1	1	0	1	4
hsa-miR-145-5p	MIMAT0000437	TLL2	7093	NM_012465	1	1	0	1	1	4
hsa-miR-145-5p	MIMAT0000437	TLN2	83660	XM_005254709	1	1	0	1	1	4
hsa-miR-145-5p	MIMAT0000437	TLR4	7099	NM_003266	1	1	0	1	1	4
hsa-miR-145-5p	MIMAT0000437	TM7SF3	51768	NM_016551	1	1	1	0	1	4
hsa-miR-145-5p	MIMAT0000437	TMBIM6	7009	NM_001098576	1	1	0	1	1	4
hsa-miR-145-5p	MIMAT0000437	TMEM117	84216	XM_005269187	1	1	0	1	1	4
hsa-miR-145-5p	MIMAT0000437	TMEM144	55314	NM_018342	1	1	0	1	1	4
hsa-miR-145-5p	MIMAT0000437	TMEM167A	153339	NM_174909	1	1	0	1	1	4
hsa-miR-145-5p	MIMAT0000437	TMEM170A	124491	XM_005255795	1	1	0	1	1	4
hsa-miR-145-5p	MIMAT0000437	TMEM178A	130733	NM_152390	0	1	1	1	1	4
hsa-miR-145-5p	MIMAT0000437	TMEM206	55248	NM_018252	1	1	1	0	1	4
hsa-miR-145-5p	MIMAT0000437	TMEM33	55161	NM_018126	0	1	1	1	1	4
hsa-miR-145-5p	MIMAT0000437	TMEM42	131616	NM_144638	1	1	1	0	1	4
hsa-miR-145-5p	MIMAT0000437	TMEM50A	23585	XM_005245816	1	1	0	1	1	4
hsa-miR-145-5p	MIMAT0000437	TMEM97	27346	NM_014573	1	1	0	1	1	4
hsa-miR-145-5p	MIMAT0000437	TMOD1	7111	NM_003275	1	1	0	1	1	4
hsa-miR-145-5p	MIMAT0000437	TMOD2	29767	NM_014548	0	1	1	1	1	4
hsa-miR-145-5p	MIMAT0000437	TNFAIP2	7127	XM_005268036	1	1	0	1	1	4
hsa-miR-145-5p	MIMAT0000437	TNFRSF10B	8795	NM_003842	1	1	0	1	1	4
hsa-miR-145-5p	MIMAT0000437	TNFRSF11B	4982	NM_002546	1	1	1	0	1	4
hsa-miR-145-5p	MIMAT0000437	TNFSF4	7292	NM_003326	1	1	0	1	1	4
hsa-miR-145-5p	MIMAT0000437	TNNI1	7135	NM_003281	1	1	0	1	1	4
hsa-miR-145-5p	MIMAT0000437	TNPO1	3842	NM_002270	1	1	0	1	1	4
hsa-miR-145-5p	MIMAT0000437	TOMM20	9804	NM_014765	1	1	0	1	1	4
hsa-miR-145-5p	MIMAT0000437	TPM3	7170	NM_001043351	1	1	1	0	1	4
hsa-miR-145-5p	MIMAT0000437	TPM3	7170	NM_153649	1	1	1	0	1	4
hsa-miR-145-5p	MIMAT0000437	TPM3	7170	NM_001043352	1	1	1	0	1	4
hsa-miR-145-5p	MIMAT0000437	TPM3	7170	NM_001043353	1	1	1	0	1	4
hsa-miR-145-5p	MIMAT0000437	TPM4	7171	NM_003290	1	1	0	1	1	4
hsa-miR-145-5p	MIMAT0000437	TPR	7175	NM_003292	1	1	1	0	1	4
hsa-miR-145-5p	MIMAT0000437	TRAF1	7185	NM_005658	1	1	0	1	1	4
hsa-miR-145-5p	MIMAT0000437	TRAF3IP1	26146	NM_015650	1	1	0	1	1	4
hsa-miR-145-5p	MIMAT0000437	TRAM1	23471	NM_014294	1	1	1	0	1	4
hsa-miR-145-5p	MIMAT0000437	TRAPPC10	7109	NM_003274	1	1	0	1	1	4
hsa-miR-145-5p	MIMAT0000437	TRIM13	10206	NM_213590	1	1	0	1	1	4
[truncated: 115 more rows]

## Sheet: All Genes
miRNA	MIMATid	Gene	EntrezID	RefseqID
hsa-let-7c-5p	MIMAT0000064	ABL2	27	NM_007314
hsa-miR-145-5p	MIMAT0000437	ACADSB	36	NM_001609
hsa-let-7c-5p	MIMAT0000064	ACP1	52	NM_004300
hsa-miR-145-5p	MIMAT0000437	ACP2	53	NM_001610
hsa-let-7c-5p	MIMAT0000064	ACPP	55	NM_001099
hsa-miR-145-5p	MIMAT0000437	ACTB	60	NM_001101
hsa-miR-145-5p	MIMAT0000437	ACTG1	71	NM_001199954
hsa-miR-145-5p	MIMAT0000437	ACVR1B	91	NM_020328
hsa-miR-145-5p	MIMAT0000437	ACVR2A	92	NM_001278579
hsa-let-7c-5p	MIMAT0000064	ACVRL1	94	XM_005269235
hsa-miR-145-5p	MIMAT0000437	ADCY1	107	NM_021116
hsa-miR-145-5p	MIMAT0000437	ADD3	120	NM_019903
hsa-miR-145-5p	MIMAT0000437	ADH6	130	XM_005262731
hsa-miR-145-5p	MIMAT0000437	ADRA1A	148	NM_033304
hsa-let-7c-5p	MIMAT0000064	ADRB1	153	NM_000684
hsa-let-7c-5p	MIMAT0000064	ADRB2	154	NM_000024
hsa-let-7c-5p	MIMAT0000064	ADRB3	155	NM_000025
hsa-miR-145-5p	MIMAT0000437	ADRB3	155	NM_000025
hsa-miR-145-5p	MIMAT0000437	AP2B1	163	XM_005257940
hsa-miR-145-5p	MIMAT0000437	AP1G1	164	XM_005255823
hsa-let-7c-5p	MIMAT0000064	AKT2	208	NM_001626
hsa-let-7c-5p	MIMAT0000064	AMT	275	NM_000481
hsa-miR-145-5p	MIMAT0000437	ANGPT2	285	NM_001147
hsa-let-7c-5p	MIMAT0000064	FAS	355	NM_000043
hsa-miR-145-5p	MIMAT0000437	ARF6	382	NM_001663
hsa-let-7c-5p	MIMAT0000064	ARG2	384	NM_001172
hsa-let-7c-5p	MIMAT0000064	STS	412	XM_005274512
hsa-miR-145-5p	MIMAT0000437	STS	412	XM_005274512
hsa-miR-145-5p	MIMAT0000437	ATF1	466	NM_005171
hsa-let-7c-5p	MIMAT0000064	ATP2A2	488	NM_170665
hsa-miR-145-5p	MIMAT0000437	ATP2B1	490	XM_005268919
hsa-let-7c-5p	MIMAT0000064	ATP6V1C1	528	NM_001695
hsa-let-7c-5p	MIMAT0000064	BACH1	571	XM_005261014
hsa-let-7c-5p	MIMAT0000064	BCAT1	586	NM_005504
hsa-miR-145-5p	MIMAT0000437	BCAT1	586	NM_005504
hsa-let-7c-5p	MIMAT0000064	BCL2L1	598	NM_138578
hsa-miR-145-5p	MIMAT0000437	BCR	613	NM_004327
hsa-miR-145-5p	MIMAT0000437	BDKRB2	624	XM_005267980
hsa-miR-145-5p	MIMAT0000437	BMP1	649	NM_006129
hsa-miR-145-5p	MIMAT0000437	BMP3	651	NM_001201
hsa-miR-145-5p	MIMAT0000437	BNIP3	664	NM_004052
hsa-let-7c-5p	MIMAT0000064	KLF9	687	NM_001206
hsa-miR-145-5p	MIMAT0000437	KLF5	688	NM_001730
hsa-let-7c-5p	MIMAT0000064	SERPING1	710	NM_000062
hsa-let-7c-5p	MIMAT0000064	C2	717	NM_000063
hsa-miR-145-5p	MIMAT0000437	C8A	731	NM_000562
hsa-miR-145-5p	MIMAT0000437	MYRF	745	XM_005274222
hsa-let-7c-5p	MIMAT0000064	DAGLA	747	NM_006133
hsa-miR-145-5p	MIMAT0000437	DAGLA	747	NM_006133
hsa-miR-145-5p	MIMAT0000437	LDLRAD4	753	NM_001003674
hsa-miR-145-5p	MIMAT0000437	CACNA1D	776	XM_005265448
hsa-miR-145-5p	MIMAT0000437	CACNA2D1	781	XM_005250569
hsa-let-7c-5p	MIMAT0000064	CACNB4	785	NM_001005747
hsa-miR-145-5p	MIMAT0000437	SLC25A20	788	NM_000387
hsa-miR-145-5p	MIMAT0000437	CAMK2B	816	NM_001220
hsa-miR-145-5p	MIMAT0000437	CAPZB	832	NM_001206540
hsa-miR-145-5p	MIMAT0000437	CASP2	835	NM_032983
hsa-let-7c-5p	MIMAT0000064	CASP3	836	NM_004346
hsa-miR-145-5p	MIMAT0000437	CAV2	858	NM_001206747
hsa-let-7c-5p	MIMAT0000064	RUNX1T1	862	NM_001198625
hsa-miR-145-5p	MIMAT0000437	RUNX3	864	NM_001031680
hsa-miR-145-5p	MIMAT0000437	CBFB	865	NM_022845
hsa-let-7c-5p	MIMAT0000064	CBL	867	NM_005188
hsa-miR-145-5p	MIMAT0000437	CBL	867	NM_005188
hsa-let-7c-5p	MIMAT0000064	CCNF	899	NM_001761
hsa-let-7c-5p	MIMAT0000064	CCNG2	901	NM_004354
hsa-miR-145-5p	MIMAT0000437	CD1D	912	NM_001766
hsa-miR-145-5p	MIMAT0000437	CD6	923	NM_006725
hsa-let-7c-5p	MIMAT0000064	CD80	941	NM_005191
hsa-miR-145-5p	MIMAT0000437	SCARB2	950	NM_005506
hsa-miR-145-5p	MIMAT0000437	CD44	960	NM_000610
hsa-miR-145-5p	MIMAT0000437	CD53	963	NM_001040033
hsa-let-7c-5p	MIMAT0000064	CD59	966	NM_203330
hsa-miR-145-5p	MIMAT0000437	CD72	971	NM_001782
hsa-let-7c-5p	MIMAT0000064	CDC5L	988	NM_001253
hsa-let-7c-5p	MIMAT0000064	CDC34	997	NM_004359
hsa-let-7c-5p	MIMAT0000064	CDH1	999	NM_004360
hsa-miR-145-5p	MIMAT0000437	CDH5	1003	NM_001795
hsa-let-7c-5p	MIMAT0000064	CDKN1A	1026	NM_001220778
hsa-miR-145-5p	MIMAT0000437	CEBPG	1054	NM_001806
hsa-miR-145-5p	MIMAT0000437	CFL2	1073	NM_138638
hsa-let-7c-5p	MIMAT0000064	CHD3	1107	XM_005256427
hsa-let-7c-5p	MIMAT0000064	CHEK1	1111	NM_001114122
hsa-miR-145-5p	MIMAT0000437	CHRNA3	1136	NM_000743
hsa-let-7c-5p	MIMAT0000064	CHUK	1147	NM_001278
hsa-miR-145-5p	MIMAT0000437	AP3S1	1176	NM_001284
hsa-miR-145-5p	MIMAT0000437	CLCN3	1182	NM_173872
hsa-let-7c-5p	MIMAT0000064	CLCN5	1184	NM_001127899
hsa-miR-145-5p	MIMAT0000437	CLCN5	1184	NM_001127899
hsa-let-7c-5p	MIMAT0000064	TPP1	1200	NM_000391
hsa-let-7c-5p	MIMAT0000064	CCR7	1236	NM_001838
hsa-let-7c-5p	MIMAT0000064	ABCC2	1244	NM_000392
hsa-let-7c-5p	MIMAT0000064	COL1A1	1277	NM_000088
hsa-let-7c-5p	MIMAT0000064	COL1A2	1278	NM_000089
hsa-let-7c-5p	MIMAT0000064	COL3A1	1281	NM_000090
hsa-let-7c-5p	MIMAT0000064	COL4A6	1288	XM_005262073
hsa-let-7c-5p	MIMAT0000064	COL5A2	1290	NM_000393
hsa-miR-145-5p	MIMAT0000437	CP	1356	NM_000096
hsa-let-7c-5p	MIMAT0000064	CPM	1368	NM_001874
hsa-miR-145-5p	MIMAT0000437	CREBL2	1389	NM_001310
hsa-miR-145-5p	MIMAT0000437	CS	1431	XM_005268664
hsa-miR-145-5p	MIMAT0000437	CSTF3	1479	NM_001326
hsa-miR-145-5p	MIMAT0000437	CTNND1	1500	NM_001085458
hsa-miR-145-5p	MIMAT0000437	CYBB	1536	NM_000397
hsa-let-7c-5p	MIMAT0000064	CYP19A1	1588	NM_031226
hsa-miR-145-5p	MIMAT0000437	DDC	1644	NM_001242889
hsa-miR-145-5p	MIMAT0000437	DFFB	1677	NM_004402
hsa-let-7c-5p	MIMAT0000064	NQO1	1728	XM_005255830
hsa-miR-145-5p	MIMAT0000437	DIAPH1	1729	XM_005268384
hsa-let-7c-5p	MIMAT0000064	DMD	1756	NM_004010
hsa-let-7c-5p	MIMAT0000064	DNA2	1763	NM_001080449
hsa-miR-145-5p	MIMAT0000437	DNMT3A	1788	XM_005264175
hsa-let-7c-5p	MIMAT0000064	DPH1	1801	XM_005256495
hsa-let-7c-5p	MIMAT0000064	DSG3	1830	NM_001944
hsa-miR-145-5p	MIMAT0000437	SLC26A2	1836	NM_000112
hsa-let-7c-5p	MIMAT0000064	DUSP3	1845	XM_005257117
hsa-miR-145-5p	MIMAT0000437	DUSP6	1848	NM_001946
hsa-let-7c-5p	MIMAT0000064	DVL3	1857	NM_004423
hsa-miR-145-5p	MIMAT0000437	DYRK1A	1859	NM_130436
hsa-let-7c-5p	MIMAT0000064	E2F6	1876	NM_001278277
hsa-miR-145-5p	MIMAT0000437	EBF1	1879	NM_024007
hsa-let-7c-5p	MIMAT0000064	EDA	1896	NM_001399
hsa-let-7c-5p	MIMAT0000064	EDN1	1906	NM_001955
hsa-miR-145-5p	MIMAT0000437	EGF	1950	NM_001963
hsa-let-7c-5p	MIMAT0000064	EGR3	1960	XM_005273425
hsa-miR-145-5p	MIMAT0000437	EIF4B	1975	XM_005268709
hsa-miR-145-5p	MIMAT0000437	EIF4EBP2	1979	NM_004096
hsa-let-7c-5p	MIMAT0000064	ELAVL1	1994	NM_001419
hsa-let-7c-5p	MIMAT0000064	ELK4	2005	NM_001973
hsa-miR-145-5p	MIMAT0000437	ELK4	2005	NM_001973
hsa-miR-145-5p	MIMAT0000437	ENSA	2029	NM_207043
hsa-miR-145-5p	MIMAT0000437	EPHA4	2043	XM_005246374
hsa-miR-145-5p	MIMAT0000437	EPS15	2060	NM_001159969
hsa-miR-145-5p	MIMAT0000437	ERBB4	2066	XM_005246375
hsa-let-7c-5p	MIMAT0000064	ERCC4	2072	NM_005236
hsa-let-7c-5p	MIMAT0000064	ERCC6	2074	NM_000124
hsa-miR-145-5p	MIMAT0000437	ERG	2078	NM_001243428
hsa-let-7c-5p	MIMAT0000064	ESR2	2100	NM_001214902
hsa-let-7c-5p	MIMAT0000064	EYA3	2140	NM_001990
hsa-miR-145-5p	MIMAT0000437	EYA3	2140	NM_001990
hsa-miR-145-5p	MIMAT0000437	F11	2160	NM_000128
hsa-miR-145-5p	MIMAT0000437	FANCC	2176	NM_000136
hsa-miR-145-5p	MIMAT0000437	ACSL4	2182	NM_022977
hsa-miR-145-5p	MIMAT0000437	FCGR3A	2214	NM_000569
hsa-miR-145-5p	MIMAT0000437	FCGR3B	2215	NM_001244753
hsa-let-7c-5p	MIMAT0000064	FKTN	2218	NM_001079802
hsa-miR-145-5p	MIMAT0000437	FDX1	2230	NM_004109
hsa-miR-145-5p	MIMAT0000437	FGF5	2250	NM_004464
hsa-let-7c-5p	MIMAT0000064	FGF11	2256	NM_004112
hsa-miR-145-5p	MIMAT0000437	FGFR3	2261	NM_001163213
hsa-miR-145-5p	MIMAT0000437	FGFR2	2263	NM_022970
hsa-miR-145-5p	MIMAT0000437	FOXE1	2304	NM_004473
hsa-miR-145-5p	MIMAT0000437	FLI1	2313	NM_002017
hsa-miR-145-5p	MIMAT0000437	FLNB	2317	NM_001164317
hsa-miR-145-5p	MIMAT0000437	FN1	2335	NM_212482
hsa-let-7c-5p	MIMAT0000064	GALC	2581	NM_000153
hsa-let-7c-5p	MIMAT0000064	GALE	2582	XM_005245835
hsa-miR-145-5p	MIMAT0000437	GALR1	2587	NM_001480
hsa-let-7c-5p	MIMAT0000064	GATM	2628	NM_001482
hsa-miR-145-5p	MIMAT0000437	GBA	2629	NM_001005741
hsa-miR-145-5p	MIMAT0000437	GCGR	2642	NM_000160
hsa-let-7c-5p	MIMAT0000064	BLOC1S1	2647	NM_001487
hsa-let-7c-5p	MIMAT0000064	NR6A1	2649	NM_033334
hsa-miR-145-5p	MIMAT0000437	GFRA1	2674	NM_005264
hsa-miR-145-5p	MIMAT0000437	GJA3	2700	NM_021954
hsa-miR-145-5p	MIMAT0000437	GCLM	2730	NM_002061
hsa-miR-145-5p	MIMAT0000437	SFN	2810	NM_006142
hsa-miR-145-5p	MIMAT0000437	GPD2	2820	NM_001083112
hsa-miR-145-5p	MIMAT0000437	GPI	2821	NM_001184722
hsa-let-7c-5p	MIMAT0000064	GPR26	2849	NM_153442
hsa-miR-145-5p	MIMAT0000437	GRB10	2887	XM_005271760
hsa-miR-145-5p	MIMAT0000437	GRIN2A	2903	NM_001134407
hsa-miR-145-5p	MIMAT0000437	GRM6	2916	NM_000843
hsa-let-7c-5p	MIMAT0000064	GYS2	2998	XM_005253352
hsa-miR-145-5p	MIMAT0000437	H2AFX	3014	NM_002105
hsa-let-7c-5p	MIMAT0000064	HDLBP	3069	NM_005336
hsa-miR-145-5p	MIMAT0000437	HHEX	3087	NM_002729
hsa-let-7c-5p	MIMAT0000064	HIP1	3092	XM_005250304
hsa-miR-145-5p	MIMAT0000437	MR1	3140	NM_001531
hsa-let-7c-5p	MIMAT0000064	HOXA1	3198	NM_153620
hsa-miR-145-5p	MIMAT0000437	HOXC11	3227	NM_014212
hsa-let-7c-5p	MIMAT0000064	HOXD1	3231	NM_024501
hsa-miR-145-5p	MIMAT0000437	DNAJB2	3300	NM_006736
hsa-miR-145-5p	MIMAT0000437	NDST1	3340	XM_005268435
hsa-miR-145-5p	MIMAT0000437	HTR1F	3355	NM_000866
hsa-miR-145-5p	MIMAT0000437	HTR2C	3358	NM_000868
hsa-let-7c-5p	MIMAT0000064	IGF1	3479	NM_001111283
hsa-miR-145-5p	MIMAT0000437	IGF1	3479	NM_001111283
hsa-let-7c-5p	MIMAT0000064	IGF1R	3480	NM_000875
hsa-miR-145-5p	MIMAT0000437	IGF1R	3480	NM_000875
hsa-miR-145-5p	MIMAT0000437	IL2RA	3559	NM_000417
hsa-let-7c-5p	MIMAT0000064	IL13	3596	NM_002188
hsa-miR-145-5p	MIMAT0000437	INPP4A	3631	NM_001134224
hsa-let-7c-5p	MIMAT0000064	INSR	3643	NM_000208
hsa-let-7c-5p	MIMAT0000064	IRF5	3663	XM_005250317
hsa-miR-145-5p	MIMAT0000437	ITGAL	3683	NM_002209
hsa-miR-145-5p	MIMAT0000437	ITGB8	3696	NM_002214
hsa-miR-145-5p	MIMAT0000437	ITPR2	3709	NM_002223
hsa-miR-145-5p	MIMAT0000437	KCNA1	3736	NM_000217
hsa-let-7c-5p	MIMAT0000064	KCNA6	3742	XM_005253686
hsa-miR-145-5p	MIMAT0000437	KCNA6	3742	XM_005253686
hsa-miR-145-5p	MIMAT0000437	KCNE1	3753	NM_000219
hsa-let-7c-5p	MIMAT0000064	KCNJ10	3766	NM_002241
hsa-let-7c-5p	MIMAT0000064	KCNJ11	3767	XM_005252910
hsa-let-7c-5p	MIMAT0000064	KPNA4	3840	NM_002268
hsa-miR-145-5p	MIMAT0000437	KPNA4	3840	NM_002268
hsa-miR-145-5p	MIMAT0000437	TNPO1	3842	NM_002270
hsa-let-7c-5p	MIMAT0000064	LAMP2	3920	NM_002294
hsa-miR-145-5p	MIMAT0000437	LAMP2	3920	NM_002294
hsa-miR-145-5p	MIMAT0000437	LASP1	3927	NM_006148
hsa-miR-145-5p	MIMAT0000437	LCP1	3936	NM_002298
hsa-miR-145-5p	MIMAT0000437	LDLR	3949	NM_000527
hsa-let-7c-5p	MIMAT0000064	LHCGR	3973	NM_000233
hsa-let-7c-5p	MIMAT0000064	LMX1A	4009	NM_177398
hsa-miR-145-5p	MIMAT0000437	VWA5A	4013	NM_198315
hsa-miR-145-5p	MIMAT0000437	LOX	4015	NM_002317
hsa-miR-145-5p	MIMAT0000437	LPP	4026	XM_005247445
hsa-miR-145-5p	MIMAT0000437	LRP2	4036	NM_004525
hsa-miR-145-5p	MIMAT0000437	LRP6	4040	NM_002336
hsa-let-7c-5p	MIMAT0000064	MXD1	4084	NM_002357
hsa-let-7c-5p	MIMAT0000064	SMAD2	4087	NM_001003652
hsa-miR-145-5p	MIMAT0000437	SMAD2	4087	NM_001003652
hsa-miR-145-5p	MIMAT0000437	SMAD4	4089	NM_005359
hsa-miR-145-5p	MIMAT0000437	SMAD5	4090	NM_001001419
hsa-miR-145-5p	MIMAT0000437	MAF	4094	NM_001031804
hsa-let-7c-5p	MIMAT0000064	MAN2A2	4122	NM_006122
hsa-let-7c-5p	MIMAT0000064	MC2R	4158	NM_000529
hsa-miR-145-5p	MIMAT0000437	ADAM11	4185	XM_005257373
hsa-miR-145-5p	MIMAT0000437	MDM2	4193	NM_002392
hsa-let-7c-5p	MIMAT0000064	MDM4	4194	NM_002393
hsa-let-7c-5p	MIMAT0000064	MECP2	4204	XM_005274683
hsa-miR-145-5p	MIMAT0000437	MEF2A	4205	NM_001171894
hsa-let-7c-5p	MIMAT0000064	MEF2D	4209	NM_005920
hsa-let-7c-5p	MIMAT0000064	MAP3K1	4214	NM_005921
hsa-miR-145-5p	MIMAT0000437	MAP3K3	4215	XM_005257376
hsa-miR-145-5p	MIMAT0000437	MEST	4232	NM_002402
hsa-miR-145-5p	MIMAT0000437	MFAP3	4238	NM_001242336
hsa-let-7c-5p	MIMAT0000064	MGAT3	4248	NM_002409
hsa-let-7c-5p	MIMAT0000064	MKLN1	4289	NM_001145354
hsa-miR-145-5p	MIMAT0000437	MKLN1	4289	NM_001145354
hsa-miR-145-5p	MIMAT0000437	MMP11	4320	NM_005940
hsa-miR-145-5p	MIMAT0000437	MMP16	4325	NM_005941
hsa-miR-145-5p	MIMAT0000437	MOCS2	4338	NM_004531
hsa-miR-145-5p	MIMAT0000437	MOG	4340	XM_005249131
hsa-let-7c-5p	MIMAT0000064	MSN	4478	XM_005262269
hsa-let-7c-5p	MIMAT0000064	MTAP	4507	NM_002451
hsa-miR-145-5p	MIMAT0000437	NUDT1	4521	NM_198949
hsa-let-7c-5p	MIMAT0000064	MYO1F	4542	NM_012335
hsa-let-7c-5p	MIMAT0000064	MTTP	4547	NM_000253
hsa-miR-145-5p	MIMAT0000437	MTR	4548	NM_000254
hsa-let-7c-5p	MIMAT0000064	MUC4	4585	NM_018406
hsa-miR-145-5p	MIMAT0000437	MYCN	4613	NM_005378
hsa-miR-145-5p	MIMAT0000437	MYO1D	4642	NM_015194
hsa-miR-145-5p	MIMAT0000437	MYO5A	4644	NM_000259
hsa-let-7c-5p	MIMAT0000064	MYO5B	4645	NM_001080467
hsa-miR-145-5p	MIMAT0000437	MYO6	4646	NM_004999
hsa-let-7c-5p	MIMAT0000064	PPP1R12B	4660	XM_005245201
hsa-let-7c-5p	MIMAT0000064	NAGA	4668	NM_000262
hsa-miR-145-5p	MIMAT0000437	NAIP	4671	NM_004536
hsa-let-7c-5p	MIMAT0000064	NAP1L1	4673	NM_139207
hsa-miR-145-5p	MIMAT0000437	NAP1L1	4673	NM_004537
hsa-let-7c-5p	MIMAT0000064	NDUFA4	4697	NM_002489
hsa-miR-145-5p	MIMAT0000437	NDUFA4	4697	NM_002489
hsa-miR-145-5p	MIMAT0000437	NDUFB5	4711	NM_002492
hsa-miR-145-5p	MIMAT0000437	DRG1	4733	NM_004147
hsa-miR-145-5p	MIMAT0000437	NEDD9	4739	NM_001142393
hsa-let-7c-5p	MIMAT0000064	NEK3	4752	NM_152720
hsa-miR-145-5p	MIMAT0000437	NEUROG1	4762	NM_006161
hsa-let-7c-5p	MIMAT0000064	NFIA	4774	NM_001134673
hsa-miR-145-5p	MIMAT0000437	NFIA	4774	NM_001134673
hsa-miR-145-5p	MIMAT0000437	NFE2L1	4779	NM_003204
hsa-let-7c-5p	MIMAT0000064	NGF	4803	NM_002506
hsa-let-7c-5p	MIMAT0000064	NME4	4833	XM_005255335
hsa-let-7c-5p	MIMAT0000064	NOS1	4842	NM_001204218
hsa-miR-145-5p	MIMAT0000437	CNOT4	4850	NM_001190848
hsa-let-7c-5p	MIMAT0000064	SLC11A2	4891	NM_001174129
hsa-miR-145-5p	MIMAT0000437	SLC11A2	4891	NM_001174129
hsa-let-7c-5p	MIMAT0000064	NRAS	4893	NM_002524
hsa-let-7c-5p	MIMAT0000064	NRTN	4902	NM_004558
hsa-miR-145-5p	MIMAT0000437	NR4A2	4929	NM_006186
hsa-miR-145-5p	MIMAT0000437	OAS3	4940	NM_006187
hsa-miR-145-5p	MIMAT0000437	OGG1	4968	NM_016828
hsa-miR-145-5p	MIMAT0000437	TNFRSF11B	4982	NM_002546
hsa-let-7c-5p	MIMAT0000064	OPRM1	4988	NM_001145287
hsa-miR-145-5p	MIMAT0000437	OSBP	5007	NM_002556
hsa-let-7c-5p	MIMAT0000064	P2RX1	5023	NM_002558
hsa-let-7c-5p	MIMAT0000064	P2RY2	5029	NM_176072
hsa-miR-145-5p	MIMAT0000437	P2RY2	5029	NM_176072
hsa-miR-145-5p	MIMAT0000437	PAFAH1B2	5049	NM_002572
hsa-let-7c-5p	MIMAT0000064	PAFAH2	5051	XM_005245874
hsa-miR-145-5p	MIMAT0000437	SERPINE1	5054	NM_000602
hsa-let-7c-5p	MIMAT0000064	PAK1	5058	NM_001128620
hsa-let-7c-5p	MIMAT0000064	PAPPA	5069	NM_002581
hsa-miR-145-5p	MIMAT0000437	PAPPA	5069	NM_002581
hsa-let-7c-5p	MIMAT0000064	PAX2	5076	NM_003988
hsa-let-7c-5p	MIMAT0000064	PBX1	5087	XM_005245228
hsa-let-7c-5p	MIMAT0000064	PBX2	5089	NM_002586
hsa-let-7c-5p	MIMAT0000064	PBX3	5090	NM_006195
hsa-miR-145-5p	MIMAT0000437	PCBP2	5094	NM_005016
hsa-miR-145-5p	MIMAT0000437	PCSK5	5125	NM_001190482
hsa-miR-145-5p	MIMAT0000437	PDCD2	5134	NM_002598
hsa-miR-145-5p	MIMAT0000437	PDE3B	5140	NM_000922
hsa-let-7c-5p	MIMAT0000064	PDE4B	5142	NM_001037341
hsa-let-7c-5p	MIMAT0000064	PDGFB	5155	NM_002608
hsa-miR-145-5p	MIMAT0000437	PDK2	5164	NM_001199898
hsa-let-7c-5p	MIMAT0000064	CDK14	5218	XM_005250439
hsa-miR-145-5p	MIMAT0000437	PGM3	5238	NM_001199917
hsa-let-7c-5p	MIMAT0000064	PGR	5241	NM_000926
hsa-miR-145-5p	MIMAT0000437	PHEX	5251	NM_000444
hsa-miR-145-5p	MIMAT0000437	PHKB	5257	NM_001031835
hsa-let-7c-5p	MIMAT0000064	SERPINB9	5272	NM_004155
hsa-let-7c-5p	MIMAT0000064	PIGA	5277	NM_002641
hsa-let-7c-5p	MIMAT0000064	PIK3C2B	5287	XM_005245260
hsa-miR-145-5p	MIMAT0000437	PIK3C2B	5287	XM_005245260
hsa-miR-145-5p	MIMAT0000437	PKHD1	5314	NM_138694
hsa-let-7c-5p	MIMAT0000064	PKP1	5317	NM_000299
hsa-miR-145-5p	MIMAT0000437	PLA2G4A	5321	NM_024420
hsa-miR-145-5p	MIMAT0000437	PLAG1	5324	NM_002655
hsa-let-7c-5p	MIMAT0000064	PLAGL2	5326	XM_005260436
hsa-miR-145-5p	MIMAT0000437	PLAGL2	5326	XM_005260436
hsa-let-7c-5p	MIMAT0000064	PLCB2	5330	NM_004573
hsa-miR-145-5p	MIMAT0000437	PLOD1	5351	XM_005263474
hsa-let-7c-5p	MIMAT0000064	PLXNA2	5362	NM_025179
hsa-miR-145-5p	MIMAT0000437	PLXNA2	5362	NM_025179
hsa-miR-145-5p	MIMAT0000437	PMAIP1	5366	XM_005266710
hsa-miR-145-5p	MIMAT0000437	PMM2	5373	NM_000303
hsa-let-7c-5p	MIMAT0000064	POLR2D	5433	XM_005263693
hsa-let-7c-5p	MIMAT0000064	POU2F2	5452	XM_005259009
hsa-let-7c-5p	MIMAT0000064	PPIA	5478	NM_021130
hsa-miR-145-5p	MIMAT0000437	PPM1A	5494	XM_005267777
hsa-let-7c-5p	MIMAT0000064	PPP1R8	5511	NM_138558
hsa-let-7c-5p	MIMAT0000064	PPP2R2A	5520	NM_002717
hsa-miR-145-5p	MIMAT0000437	PPP2R3A	5523	NM_181897
hsa-miR-145-5p	MIMAT0000437	PPP3CA	5530	NM_000944
hsa-miR-145-5p	MIMAT0000437	PPP3R2	5535	NM_147180
hsa-miR-145-5p	MIMAT0000437	PRCP	5547	NM_199418
hsa-let-7c-5p	MIMAT0000064	PRKAA2	5563	NM_006252
hsa-let-7c-5p	MIMAT0000064	PRKCB	5579	NM_002738
hsa-miR-145-5p	MIMAT0000437	PRKDC	5591	NM_001081640
hsa-let-7c-5p	MIMAT0000064	MAPK4	5596	XM_005258299
hsa-miR-145-5p	MIMAT0000437	MAPK4	5596	XM_005258299
hsa-let-7c-5p	MIMAT0000064	MAPK6	5597	XM_005254536
hsa-let-7c-5p	MIMAT0000064	MAPK8	5599	XM_005269974
hsa-let-7c-5p	MIMAT0000064	MAPK11	5600	NM_002751
hsa-miR-145-5p	MIMAT0000437	MAPK9	5601	XM_005265940
hsa-miR-145-5p	MIMAT0000437	PRKX	5613	NM_005044
hsa-let-7c-5p	MIMAT0000064	PRLR	5618	NM_000949
hsa-miR-145-5p	MIMAT0000437	PRLR	5618	NM_001204314
hsa-miR-145-5p	MIMAT0000437	PRRG1	5638	NM_001173489
hsa-let-7c-5p	MIMAT0000064	MASP1	5648	NM_001879
hsa-let-7c-5p	MIMAT0000064	KLK6	5653	NM_001012964
hsa-let-7c-5p	MIMAT0000064	KLK10	5655	NM_002776
hsa-let-7c-5p	MIMAT0000064	PSKH1	5681	NM_006742
hsa-let-7c-5p	MIMAT0000064	PTAFR	5724	NM_001164723
hsa-miR-145-5p	MIMAT0000437	PTGFR	5737	NM_001039585
hsa-let-7c-5p	MIMAT0000064	PTPN4	5775	NM_002830
hsa-let-7c-5p	MIMAT0000064	PTPN7	5778	NM_002832
hsa-let-7c-5p	MIMAT0000064	PTPRB	5787	NM_001109754
hsa-let-7c-5p	MIMAT0000064	PTPRD	5789	XM_005251529
hsa-let-7c-5p	MIMAT0000064	RAD1	5810	NM_002853
hsa-miR-145-5p	MIMAT0000437	PURB	5814	NM_033224
hsa-let-7c-5p	MIMAT0000064	PVR	5817	NM_006505
hsa-miR-145-5p	MIMAT0000437	PVR	5817	NM_006505
hsa-miR-145-5p	MIMAT0000437	PEX2	5828	NM_000318
hsa-miR-145-5p	MIMAT0000437	PXN	5829	XM_005253910
hsa-let-7c-5p	MIMAT0000064	QARS	5859	NM_005051
hsa-miR-145-5p	MIMAT0000437	MAP4K2	5871	XM_005274142
hsa-let-7c-5p	MIMAT0000064	RAD9A	5883	NM_004584
hsa-miR-145-5p	MIMAT0000437	RAD23B	5887	NM_002874
hsa-miR-145-5p	MIMAT0000437	RAD51B	5890	NM_133509
hsa-let-7c-5p	MIMAT0000064	RALB	5899	XM_005263728
hsa-let-7c-5p	MIMAT0000064	RANBP2	5903	XM_005264002
hsa-miR-145-5p	MIMAT0000437	RANBP2	5903	NM_006267
hsa-miR-145-5p	MIMAT0000437	RAP2A	5911	NM_021033
hsa-miR-145-5p	MIMAT0000437	RAP2B	5912	NM_002886
hsa-miR-145-5p	MIMAT0000437	RASA1	5921	NM_022650
hsa-miR-145-5p	MIMAT0000437	RASA2	5922	XM_005247687
hsa-miR-145-5p	MIMAT0000437	RASGRF1	5923	NM_002891
hsa-miR-145-5p	MIMAT0000437	RASGRF2	5924	NM_006909
hsa-let-7c-5p	MIMAT0000064	RBMS1	5937	XM_005246738
hsa-let-7c-5p	MIMAT0000064	RDX	5962	NM_002906
hsa-miR-145-5p	MIMAT0000437	REV3L	5980	NM_002912
hsa-let-7c-5p	MIMAT0000064	RFC1	5981	NM_001204747
hsa-miR-145-5p	MIMAT0000437	RFX2	5990	NM_000635
hsa-miR-145-5p	MIMAT0000437	RFX3	5991	NM_134428
hsa-miR-145-5p	MIMAT0000437	RFX4	5992	NM_213594
hsa-miR-145-5p	MIMAT0000437	RGS7	6000	NM_002924
hsa-let-7c-5p	MIMAT0000064	RGS16	6004	NM_002928
hsa-let-7c-5p	MIMAT0000064	RHD	6007	NM_016124
hsa-miR-145-5p	MIMAT0000437	ABCE1	6059	NM_002940
hsa-miR-145-5p	MIMAT0000437	RPA1	6117	NM_002945
hsa-miR-145-5p	MIMAT0000437	RPL32	6161	NM_001007074
hsa-let-7c-5p	MIMAT0000064	RPL34	6164	NM_033625
hsa-let-7c-5p	MIMAT0000064	RPL36A	6173	NM_001199972
hsa-let-7c-5p	MIMAT0000064	RPS6KA3	6197	XM_005274574
hsa-miR-145-5p	MIMAT0000437	RPS6KA3	6197	XM_005274574
hsa-miR-145-5p	MIMAT0000437	RPS6KB1	6198	NM_001272044
hsa-miR-145-5p	MIMAT0000437	RREB1	6239	NM_001003700
hsa-let-7c-5p	MIMAT0000064	RRM2	6241	NM_001165931
hsa-let-7c-5p	MIMAT0000064	RTKN	6242	NM_033046
hsa-miR-145-5p	MIMAT0000437	RTKN	6242	NM_033046
hsa-miR-145-5p	MIMAT0000437	SORT1	6272	XM_005271102
hsa-miR-145-5p	MIMAT0000437	ATXN1	6310	NM_000332
hsa-miR-145-5p	MIMAT0000437	ATXN2	6311	XM_005253925
hsa-miR-145-5p	MIMAT0000437	ATXN7	6314	NM_000333
hsa-let-7c-5p	MIMAT0000064	SCD	6319	NM_005063
hsa-miR-145-5p	MIMAT0000437	SCN2A	6326	NM_021007
hsa-miR-145-5p	MIMAT0000437	SCN3A	6328	NM_006922
hsa-let-7c-5p	MIMAT0000064	SCN4B	6330	NM_174934
hsa-let-7c-5p	MIMAT0000064	SCN5A	6331	NM_001099404
hsa-let-7c-5p	MIMAT0000064	CCL7	6354	NM_006273
hsa-let-7c-5p	MIMAT0000064	CCL16	6360	XM_005258020
hsa-let-7c-5p	MIMAT0000064	CCL22	6367	NM_002990
hsa-miR-145-5p	MIMAT0000437	CCL25	6370	XM_005272492
hsa-let-7c-5p	MIMAT0000064	SEMA3F	6405	XM_005265381
hsa-let-7c-5p	MIMAT0000064	SFTPB	6439	NM_000542
hsa-let-7c-5p	MIMAT0000064	SGCD	6444	NM_000337
hsa-miR-145-5p	MIMAT0000437	SH3BP2	6452	NM_001145855
hsa-let-7c-5p	MIMAT0000064	FBXW4	6468	XM_005270053
hsa-miR-145-5p	MIMAT0000437	ST3GAL1	6482	XM_005251023
hsa-miR-145-5p	MIMAT0000437	SKP1	6500	NM_006930
hsa-miR-145-5p	MIMAT0000437	SLA	6503	NM_001045556
hsa-miR-145-5p	MIMAT0000437	SLAMF1	6504	NM_003037
hsa-miR-145-5p	MIMAT0000437	SLC1A2	6506	NM_004171
hsa-let-7c-5p	MIMAT0000064	SLC1A4	6509	NM_003038
hsa-miR-145-5p	MIMAT0000437	SLC1A4	6509	NM_003038
hsa-let-7c-5p	MIMAT0000064	SLC5A1	6523	NM_000343
hsa-miR-145-5p	MIMAT0000437	SLC5A3	6526	NM_006933
hsa-let-7c-5p	MIMAT0000064	SLC6A1	6529	XM_005265410
hsa-miR-145-5p	MIMAT0000437	SLC6A4	6532	NM_001045
hsa-miR-145-5p	MIMAT0000437	SLC7A1	6541	NM_003045
hsa-miR-145-5p	MIMAT0000437	SLC7A2	6542	NM_001008539
hsa-let-7c-5p	MIMAT0000064	SLC8A2	6543	NM_015063
hsa-miR-145-5p	MIMAT0000437	SLC8A3	6547	NM_183002
hsa-let-7c-5p	MIMAT0000064	SLC10A2	6555	NM_000452
hsa-miR-145-5p	MIMAT0000437	SLC11A1	6556	NM_000578
hsa-let-7c-5p	MIMAT0000064	SLC20A1	6574	NM_005415
hsa-let-7c-5p	MIMAT0000064	SLCO2A1	6578	NM_005630
hsa-miR-145-5p	MIMAT0000437	SLC22A5	6584	XM_005272055
hsa-miR-145-5p	MIMAT0000437	SLIT3	6586	NM_001271946
hsa-miR-145-5p	MIMAT0000437	SLN	6588	NM_003063
hsa-miR-145-5p	MIMAT0000437	HLTF	6596	NM_003071
hsa-let-7c-5p	MIMAT0000064	SMARCC1	6599	NM_003074
hsa-miR-145-5p	MIMAT0000437	FSCN1	6624	NM_003088
hsa-let-7c-5p	MIMAT0000064	SNX1	6642	NM_003099
hsa-miR-145-5p	MIMAT0000437	SNTB2	6645	NM_006750
hsa-miR-145-5p	MIMAT0000437	SOAT1	6646	NM_003101
hsa-miR-145-5p	MIMAT0000437	SOX4	6659	NM_003107
hsa-miR-145-5p	MIMAT0000437	SOX9	6662	NM_000346
hsa-miR-145-5p	MIMAT0000437	SOX11	6664	NM_003108
hsa-let-7c-5p	MIMAT0000064	SOX12	6666	NM_006943
hsa-miR-145-5p	MIMAT0000437	SRI	6717	NM_003130
hsa-miR-145-5p	MIMAT0000437	AKR1D1	6718	NM_001190907
hsa-let-7c-5p	MIMAT0000064	SREBF2	6721	NM_004599
hsa-miR-145-5p	MIMAT0000437	SRP9	6726	NM_001130440
hsa-miR-145-5p	MIMAT0000437	SS18	6760	XM_005258335
hsa-let-7c-5p	MIMAT0000064	STAT3	6774	XM_005257614
hsa-miR-145-5p	MIMAT0000437	STC1	6781	NM_003155
hsa-let-7c-5p	MIMAT0000064	ELOVL4	6785	NM_022726
hsa-miR-145-5p	MIMAT0000437	ELOVL4	6785	NM_022726
hsa-let-7c-5p	MIMAT0000064	AURKA	6790	NM_198433
hsa-let-7c-5p	MIMAT0000064	STX1A	6804	NM_004603
hsa-let-7c-5p	MIMAT0000064	STX3	6809	NM_004177
hsa-let-7c-5p	MIMAT0000064	SUOX	6821	NM_000456
hsa-miR-145-5p	MIMAT0000437	SYT1	6857	NM_001135805
hsa-miR-145-5p	MIMAT0000437	ADAM17	6868	NM_003183
hsa-let-7c-5p	MIMAT0000064	TARBP2	6895	XM_005269120
hsa-miR-145-5p	MIMAT0000437	TAT	6898	NM_000353
hsa-miR-145-5p	MIMAT0000437	CNTN2	6900	NM_005076
hsa-let-7c-5p	MIMAT0000064	TAZ	6901	NM_000116
hsa-miR-145-5p	MIMAT0000437	TCEB3	6924	NM_003198
hsa-miR-145-5p	MIMAT0000437	GCFC2	6936	NM_003203
hsa-let-7c-5p	MIMAT0000064	ZNF354A	6940	NM_005649
hsa-miR-145-5p	MIMAT0000437	TEAD1	7003	NM_021961
hsa-let-7c-5p	MIMAT0000064	TEAD3	7005	XM_005249342
hsa-miR-145-5p	MIMAT0000437	TMBIM6	7009	NM_001098576
hsa-miR-145-5p	MIMAT0000437	NR2F2	7026	NM_021005
hsa-let-7c-5p	MIMAT0000064	TFDP2	7029	NM_001178138
hsa-let-7c-5p	MIMAT0000064	TGFBR1	7046	NM_004612
hsa-miR-145-5p	MIMAT0000437	TGFBR1	7046	NM_004612
hsa-miR-145-5p	MIMAT0000437	TGFBR2	7048	NM_003242
hsa-let-7c-5p	MIMAT0000064	TGFBR3	7049	NM_001195683
hsa-miR-145-5p	MIMAT0000437	THPO	7066	XM_005247737
hsa-let-7c-5p	MIMAT0000064	THRSP	7069	NM_003251
hsa-let-7c-5p	MIMAT0000064	TIA1	7072	XM_005264529
hsa-miR-145-5p	MIMAT0000437	TJP1	7082	NM_003257
hsa-let-7c-5p	MIMAT0000064	TK1	7083	XM_005257631
hsa-let-7c-5p	MIMAT0000064	TK2	7084	NM_001271934
hsa-miR-145-5p	MIMAT0000437	TLL1	7092	NM_012464
hsa-miR-145-5p	MIMAT0000437	TLR4	7099	NM_003266
hsa-let-7c-5p	MIMAT0000064	TRAPPC10	7109	NM_003274
hsa-miR-145-5p	MIMAT0000437	TRAPPC10	7109	NM_003274
hsa-miR-145-5p	MIMAT0000437	TMOD1	7111	NM_003275
hsa-let-7c-5p	MIMAT0000064	TMPRSS2	7113	XM_005261041
hsa-miR-145-5p	MIMAT0000437	TNFAIP2	7127	XM_005268036
hsa-let-7c-5p	MIMAT0000064	TNFAIP3	7128	NM_001270508
hsa-let-7c-5p	MIMAT0000064	TNFRSF1B	7133	NM_001066
hsa-let-7c-5p	MIMAT0000064	TNNI1	7135	NM_003281
hsa-miR-145-5p	MIMAT0000437	TNNI1	7135	NM_003281
hsa-let-7c-5p	MIMAT0000064	TP53	7157	NM_001276696
hsa-miR-145-5p	MIMAT0000437	TPM3	7170	NM_001043351
hsa-miR-145-5p	MIMAT0000437	TPM4	7171	NM_003290
hsa-miR-145-5p	MIMAT0000437	TPR	7175	NM_003292
hsa-miR-145-5p	MIMAT0000437	TRAF1	7185	NM_005658
hsa-miR-145-5p	MIMAT0000437	TRPM2	7226	NM_003307
hsa-let-7c-5p	MIMAT0000064	TSC1	7248	XM_005272211
hsa-miR-145-5p	MIMAT0000437	TTC4	7268	NM_004623
hsa-miR-145-5p	MIMAT0000437	TNFSF4	7292	NM_003326
hsa-miR-145-5p	MIMAT0000437	UBA52	7311	NM_001033930
hsa-miR-145-5p	MIMAT0000437	UBE2D3	7323	NM_181892
hsa-let-7c-5p	MIMAT0000064	UBE2G2	7327	NM_182688
hsa-miR-145-5p	MIMAT0000437	UBE2G2	7327	NM_182688
hsa-miR-145-5p	MIMAT0000437	UFD1L	7353	XM_005261276
hsa-let-7c-5p	MIMAT0000064	SLC35A2	7355	NM_001042498
hsa-let-7c-5p	MIMAT0000064	COL14A1	7373	NM_021110
hsa-let-7c-5p	MIMAT0000064	UTRN	7402	XM_005267129
hsa-let-7c-5p	MIMAT0000064	UTY	7404	NM_001258249
hsa-let-7c-5p	MIMAT0000064	VCL	7414	NM_014000
hsa-miR-145-5p	MIMAT0000437	VDR	7421	NM_001017536
hsa-miR-145-5p	MIMAT0000437	VRK2	7444	NM_001130483
hsa-miR-145-5p	MIMAT0000437	WRB	7485	XM_005261061
hsa-let-7c-5p	MIMAT0000064	XG	7499	XM_005274587
hsa-miR-145-5p	MIMAT0000437	XG	7499	XM_005274587
hsa-let-7c-5p	MIMAT0000064	XK	7504	NM_021083
hsa-miR-145-5p	MIMAT0000437	YES1	7525	NM_005433
hsa-miR-145-5p	MIMAT0000437	ZNF2	7549	NM_021088
hsa-miR-145-5p	MIMAT0000437	ZNF711	7552	NM_021998
hsa-let-7c-5p	MIMAT0000064	ZNF10	7556	NM_015394
hsa-miR-145-5p	MIMAT0000437	ZNF708	7562	NM_021269
hsa-let-7c-5p	MIMAT0000064	ZNF24	7572	NM_006965
hsa-miR-145-5p	MIMAT0000437	ZNF24	7572	NM_006965
hsa-let-7c-5p	MIMAT0000064	ZNF28	7576	NM_006969
hsa-miR-145-5p	MIMAT0000437	ZNF28	7576	NM_006969
hsa-miR-145-5p	MIMAT0000437	ZNF37A	7587	NM_001007094
hsa-miR-145-5p	MIMAT0000437	ZNF41	7592	XM_005272664
hsa-let-7c-5p	MIMAT0000064	ZNF70	7621	NM_021916
hsa-let-7c-5p	MIMAT0000064	ZNF79	7633	XM_005252190
hsa-miR-145-5p	MIMAT0000437	PCGF2	7703	XM_005257640
hsa-miR-145-5p	MIMAT0000437	VEZF1	7716	NM_007146
hsa-let-7c-5p	MIMAT0000064	ZNF200	7752	NM_003454
hsa-let-7c-5p	MIMAT0000064	ZNF202	7753	XM_005271660
hsa-let-7c-5p	MIMAT0000064	ZNF215	7762	NM_013250
hsa-let-7c-5p	MIMAT0000064	ZFAND5	7763	NM_001102420
hsa-miR-145-5p	MIMAT0000437	ZFAND5	7763	NM_001102420
hsa-miR-145-5p	MIMAT0000437	ZNF226	7769	XM_005259227
hsa-miR-145-5p	MIMAT0000437	MAP3K12	7786	XM_005269139
hsa-miR-145-5p	MIMAT0000437	LUZP1	7798	XM_005245991
hsa-let-7c-5p	MIMAT0000064	PRDM2	7799	NM_001007257
hsa-miR-145-5p	MIMAT0000437	PRDM2	7799	NM_012231
hsa-miR-145-5p	MIMAT0000437	DNALI1	7802	NM_003462
hsa-miR-145-5p	MIMAT0000437	LAPTM5	7805	NM_006762
hsa-miR-145-5p	MIMAT0000437	BTG2	7832	NM_006763
hsa-let-7c-5p	MIMAT0000064	FZD5	7855	NM_003468
hsa-miR-145-5p	MIMAT0000437	FZD5	7855	NM_003468
hsa-miR-145-5p	MIMAT0000437	ALDH5A1	7915	NM_170740
hsa-let-7c-5p	MIMAT0000064	FZD3	7976	NM_017412
hsa-miR-145-5p	MIMAT0000437	FZD3	7976	NM_017412
hsa-miR-145-5p	MIMAT0000437	NR4A3	8013	NM_173200
hsa-miR-145-5p	MIMAT0000437	PTP4A2	8073	NM_080391
hsa-let-7c-5p	MIMAT0000064	HMGA2	8091	NM_003483
hsa-let-7c-5p	MIMAT0000064	GAN	8139	NM_022041
hsa-let-7c-5p	MIMAT0000064	COIL	8161	NM_004645
hsa-miR-145-5p	MIMAT0000437	NCOA3	8202	NM_181659
hsa-miR-145-5p	MIMAT0000437	CHAF1B	8208	NM_005441
hsa-let-7c-5p	MIMAT0000064	HDHD1	8226	NM_001135565
hsa-let-7c-5p	MIMAT0000064	SMC1A	8243	NM_001281463
hsa-miR-145-5p	MIMAT0000437	SMC1A	8243	NM_001281463
hsa-let-7c-5p	MIMAT0000064	SNN	8303	NM_003498
hsa-let-7c-5p	MIMAT0000064	FZD4	8322	NM_012193
hsa-miR-145-5p	MIMAT0000437	FZD4	8322	NM_012193
hsa-miR-145-5p	MIMAT0000437	FZD7	8324	NM_003507
hsa-miR-145-5p	MIMAT0000437	SLC25A11	8402	NM_003562
hsa-miR-145-5p	MIMAT0000437	SPOP	8405	NM_001007226
hsa-let-7c-5p	MIMAT0000064	EEA1	8411	NM_003566
hsa-miR-145-5p	MIMAT0000437	EEA1	8411	NM_003566
hsa-miR-145-5p	MIMAT0000437	RASAL1	8437	NM_004658
hsa-let-7c-5p	MIMAT0000064	SMARCA5	8467	NM_003601
hsa-miR-145-5p	MIMAT0000437	SMARCA5	8467	NM_003601
hsa-let-7c-5p	MIMAT0000064	MAP4K3	8491	NM_003618
hsa-miR-145-5p	MIMAT0000437	ENC1	8507	NM_001256574
hsa-let-7c-5p	MIMAT0000064	NDST2	8509	NM_003635
hsa-let-7c-5p	MIMAT0000064	IKBKAP	8518	NM_003640
hsa-miR-145-5p	MIMAT0000437	IKBKAP	8518	NM_003640
hsa-let-7c-5p	MIMAT0000064	GAS7	8522	NM_201433
hsa-let-7c-5p	MIMAT0000064	DGKE	8526	NM_003647
hsa-let-7c-5p	MIMAT0000064	CYP4F2	8529	NM_001082
hsa-miR-145-5p	MIMAT0000437	PPFIA3	8541	NM_003660
hsa-miR-145-5p	MIMAT0000437	CGGBP1	8545	NM_001008390
hsa-miR-145-5p	MIMAT0000437	CDC14B	8555	NM_033331
hsa-miR-145-5p	MIMAT0000437	PRPF18	8559	NM_003675
hsa-miR-145-5p	MIMAT0000437	PDXK	8566	NM_003681
hsa-let-7c-5p	MIMAT0000064	CASK	8573	XM_005272685
hsa-miR-145-5p	MIMAT0000437	UNC5C	8633	XM_005263321
hsa-let-7c-5p	MIMAT0000064	TNKS	8658	XM_005272399
hsa-miR-145-5p	MIMAT0000437	IRS2	8660	NM_003749
hsa-miR-145-5p	MIMAT0000437	SLC4A4	8671	XM_005265704
hsa-miR-145-5p	MIMAT0000437	HYAL2	8692	NM_033158
hsa-let-7c-5p	MIMAT0000064	RNMT	8731	NM_003799
hsa-let-7c-5p	MIMAT0000064	TNFSF10	8743	NM_003810
hsa-let-7c-5p	MIMAT0000064	TNFSF9	8744	NM_003811
hsa-miR-145-5p	MIMAT0000437	RAB11A	8766	NM_004663
hsa-let-7c-5p	MIMAT0000064	SIGLEC5	8778	NM_003830
hsa-let-7c-5p	MIMAT0000064	RIOK3	8780	NM_003831
hsa-miR-145-5p	MIMAT0000437	TNFRSF10B	8795	NM_003842
hsa-let-7c-5p	MIMAT0000064	PEX11B	8799	NM_003846
hsa-miR-145-5p	MIMAT0000437	CREG1	8804	NM_003851
hsa-miR-145-5p	MIMAT0000437	IL18R1	8809	NM_003855
hsa-miR-145-5p	MIMAT0000437	NRP2	8828	NM_201266
hsa-let-7c-5p	MIMAT0000064	CFLAR	8837	NM_001202519
hsa-miR-145-5p	MIMAT0000437	LDB1	8861	XM_005270262
hsa-miR-145-5p	MIMAT0000437	SYNJ1	8867	NM_203446
hsa-let-7c-5p	MIMAT0000064	EIF2S2	8894	NM_003908
hsa-let-7c-5p	MIMAT0000064	GYG2	8908	NM_003918
hsa-miR-145-5p	MIMAT0000437	PHOX2B	8929	NM_003924
hsa-let-7c-5p	MIMAT0000064	MBD2	8932	NM_003927
hsa-miR-145-5p	MIMAT0000437	SKAP2	8935	NM_003930
hsa-miR-145-5p	MIMAT0000437	USP13	8975	NM_003940
hsa-miR-145-5p	MIMAT0000437	SEMA5A	9037	NM_003966
hsa-let-7c-5p	MIMAT0000064	CLDN12	9069	NM_001185072
hsa-miR-145-5p	MIMAT0000437	SEC22C	9117	XM_005265532
hsa-let-7c-5p	MIMAT0000064	AIFM1	9131	NM_001130847
hsa-let-7c-5p	MIMAT0000064	ATG12	9140	NM_004707
hsa-miR-145-5p	MIMAT0000437	MAP3K13	9175	NM_004721
hsa-let-7c-5p	MIMAT0000064	OSMR	9180	NM_003999
hsa-miR-145-5p	MIMAT0000437	ZBED1	9189	NM_001171135
hsa-miR-145-5p	MIMAT0000437	VAPA	9218	NM_003574
hsa-miR-145-5p	MIMAT0000437	LRAT	9227	NM_004744
hsa-miR-145-5p	MIMAT0000437	CYTH1	9267	NM_004762
hsa-miR-145-5p	MIMAT0000437	UBE4A	9354	NM_004788
hsa-let-7c-5p	MIMAT0000064	ITGBL1	9358	XM_005254100
hsa-miR-145-5p	MIMAT0000437	ZFYVE9	9372	NM_004799
hsa-let-7c-5p	MIMAT0000064	PPT2	9374	NM_005155
hsa-miR-145-5p	MIMAT0000437	TGFBRAP1	9392	XM_005264042
hsa-miR-145-5p	MIMAT0000437	HS6ST1	9394	NM_004807
hsa-let-7c-5p	MIMAT0000064	FADS2	9415	NM_004265
hsa-let-7c-5p	MIMAT0000064	NTN1	9423	NM_004822
hsa-miR-145-5p	MIMAT0000437	QKI	9444	NM_206855
hsa-miR-145-5p	MIMAT0000437	RASAL2	9462	NM_170692
hsa-let-7c-5p	MIMAT0000064	CHST3	9469	NM_004273
hsa-miR-145-5p	MIMAT0000437	CHST3	9469	NM_004273
hsa-let-7c-5p	MIMAT0000064	ONECUT2	9480	NM_004852
hsa-miR-145-5p	MIMAT0000437	ONECUT2	9480	NM_004852
hsa-miR-145-5p	MIMAT0000437	SPTLC2	9517	NM_004863
hsa-miR-145-5p	MIMAT0000437	TBPL1	9519	NM_001253676
hsa-miR-145-5p	MIMAT0000437	BAG4	9530	NM_001204878
hsa-let-7c-5p	MIMAT0000064	IGDCC3	9543	NM_004884
hsa-let-7c-5p	MIMAT0000064	H6PD	9563	XM_005263539
hsa-let-7c-5p	MIMAT0000064	GABBR2	9568	NM_005458
hsa-let-7c-5p	MIMAT0000064	CLOCK	9575	NM_001267843
hsa-miR-145-5p	MIMAT0000437	AKAP12	9590	XM_005267234
hsa-miR-145-5p	MIMAT0000437	SH3PXD2A	9644	XM_005270294
hsa-let-7c-5p	MIMAT0000064	HS2ST1	9653	NM_012262
hsa-let-7c-5p	MIMAT0000064	TTLL4	9654	NM_014640
hsa-miR-145-5p	MIMAT0000437	LPIN2	9663	NM_014646
hsa-miR-145-5p	MIMAT0000437	SLC25A44	9673	NM_014655
hsa-miR-145-5p	MIMAT0000437	VGLL4	9686	NM_001128219
hsa-miR-145-5p	MIMAT0000437	BZW1	9689	NM_001207067
hsa-miR-145-5p	MIMAT0000437	RAPGEF2	9693	XM_005263358
hsa-let-7c-5p	MIMAT0000064	ESPL1	9700	NM_012291
hsa-let-7c-5p	MIMAT0000064	SEC14L5	9717	NM_014692
hsa-miR-145-5p	MIMAT0000437	UTP14C	9724	NM_021645
hsa-miR-145-5p	MIMAT0000437	PHACTR2	9749	NM_001100164
hsa-let-7c-5p	MIMAT0000064	TBKBP1	9755	XM_005257860
hsa-miR-145-5p	MIMAT0000437	HDAC4	9759	NM_006037
hsa-miR-145-5p	MIMAT0000437	BCLAF1	9774	XM_005267237
hsa-let-7c-5p	MIMAT0000064	MATR3	9782	NM_199189
hsa-miR-145-5p	MIMAT0000437	RIMS3	9783	NM_014747
hsa-miR-145-5p	MIMAT0000437	SERTAD2	9792	XM_005264669
hsa-miR-145-5p	MIMAT0000437	TATDN2	9797	NM_014760
hsa-miR-145-5p	MIMAT0000437	TOMM20	9804	NM_014765
hsa-let-7c-5p	MIMAT0000064	ZNF623	9831	NM_001082480
hsa-miR-145-5p	MIMAT0000437	ELMO1	9844	NM_001206482
hsa-let-7c-5p	MIMAT0000064	LRIG2	9860	XM_005271369
hsa-miR-145-5p	MIMAT0000437	AREL1	9870	XM_005268243
hsa-miR-145-5p	MIMAT0000437	ZC3H11A	9877	NM_014827
hsa-miR-145-5p	MIMAT0000437	DDX46	9879	NM_014829
hsa-let-7c-5p	MIMAT0000064	ZBTB39	9880	NM_014830
hsa-let-7c-5p	MIMAT0000064	TRANK1	9881	NM_014831
hsa-miR-145-5p	MIMAT0000437	NUAK1	9891	NM_014840
hsa-let-7c-5p	MIMAT0000064	SRGAP3	9901	NM_014850
hsa-miR-145-5p	MIMAT0000437	ARHGAP44	9912	NM_014859
hsa-miR-145-5p	MIMAT0000437	SUPT7L	9913	NM_014860
hsa-let-7c-5p	MIMAT0000064	ARNT2	9915	XM_005254811
hsa-miR-145-5p	MIMAT0000437	ARNT2	9915	NM_014862
hsa-miR-145-5p	MIMAT0000437	PAN2	9924	NM_001127460
hsa-let-7c-5p	MIMAT0000064	LPGAT1	9926	XM_005273364
hsa-miR-145-5p	MIMAT0000437	LPGAT1	9926	XM_005273364
hsa-let-7c-5p	MIMAT0000064	HELZ	9931	XM_005257888
hsa-miR-145-5p	MIMAT0000437	HELZ	9931	XM_005257888
hsa-miR-145-5p	MIMAT0000437	HS3ST4	9951	NM_006040
hsa-let-7c-5p	MIMAT0000064	USP15	9958	NM_001252078
hsa-miR-145-5p	MIMAT0000437	THRAP3	9967	XM_005271370
hsa-miR-145-5p	MIMAT0000437	MED13	9969	NM_005121
hsa-miR-145-5p	MIMAT0000437	PTBP3	9991	NM_001244898
hsa-miR-145-5p	MIMAT0000437	ZBTB33	10009	NM_001184742
hsa-miR-145-5p	MIMAT0000437	SH2B3	10019	NM_005475
hsa-miR-145-5p	MIMAT0000437	HCN4	10021	NM_005477
hsa-let-7c-5p	MIMAT0000064	GJC1	10052	NM_005497
hsa-let-7c-5p	MIMAT0000064	ABCC5	10057	XM_005247059
hsa-let-7c-5p	MIMAT0000064	RASGRP1	10125	NM_005739
hsa-miR-145-5p	MIMAT0000437	G3BP1	10146	NM_005754
hsa-let-7c-5p	MIMAT0000064	RASA4	10156	NM_006989
hsa-let-7c-5p	MIMAT0000064	ZNF197	10168	XM_005264783
hsa-miR-145-5p	MIMAT0000437	ZNF197	10168	XM_005264783
hsa-let-7c-5p	MIMAT0000064	SERF2	10169	NM_001199877
hsa-miR-145-5p	MIMAT0000437	LHFPL2	10184	NM_005779
hsa-miR-145-5p	MIMAT0000437	TXNDC9	10190	NM_005783
hsa-miR-145-5p	MIMAT0000437	MPZL2	10205	NM_005797
hsa-let-7c-5p	MIMAT0000064	TRIM13	10206	NM_213590
hsa-miR-145-5p	MIMAT0000437	TRIM13	10206	NM_213590
hsa-miR-145-5p	MIMAT0000437	INADL	10207	NM_176877
hsa-miR-145-5p	MIMAT0000437	GDF11	10220	NM_005811
hsa-miR-145-5p	MIMAT0000437	AP3S2	10239	NM_005829
hsa-miR-145-5p	MIMAT0000437	GPHN	10243	NM_020806
hsa-miR-145-5p	MIMAT0000437	NET1	10276	NM_001047160
hsa-miR-145-5p	MIMAT0000437	LILRB2	10288	NM_005874
hsa-let-7c-5p	MIMAT0000064	APC2	10297	NM_005883
hsa-let-7c-5p	MIMAT0000064	APBB3	10307	NM_006051
hsa-miR-145-5p	MIMAT0000437	IKZF1	10320	NM_006060
hsa-miR-145-5p	MIMAT0000437	MRVI1	10335	XM_005252736
hsa-let-7c-5p	MIMAT0000064	PCGF3	10336	XM_005272253
hsa-let-7c-5p	MIMAT0000064	WARS2	10352	XM_005270350
hsa-miR-145-5p	MIMAT0000437	SEMA3A	10371	XM_005250110
hsa-miR-145-5p	MIMAT0000437	ATP8A1	10396	NM_006095
hsa-let-7c-5p	MIMAT0000064	COG5	10466	NM_001161520
hsa-miR-145-5p	MIMAT0000437	SLC25A17	10478	XM_005261306
hsa-let-7c-5p	MIMAT0000064	SYNCRIP	10492	NM_001159677
hsa-let-7c-5p	MIMAT0000064	SEMA4F	10505	NM_004263
hsa-miR-145-5p	MIMAT0000437	SEMA4B	10509	XM_005254830
hsa-miR-145-5p	MIMAT0000437	APPBP2	10513	NM_006380
hsa-miR-145-5p	MIMAT0000437	ARL6IP5	10550	NM_006407
hsa-miR-145-5p	MIMAT0000437	SPTLC1	10558	NM_006415
hsa-let-7c-5p	MIMAT0000064	OLFM4	10562	NM_006418
hsa-miR-145-5p	MIMAT0000437	SORBS1	10580	XM_005269403
hsa-miR-145-5p	MIMAT0000437	SMC2	10592	NM_001042550
hsa-let-7c-5p	MIMAT0000064	STAMBP	10617	NM_213622
hsa-miR-145-5p	MIMAT0000437	EXOC5	10640	NM_006544
hsa-let-7c-5p	MIMAT0000064	IGF2BP1	10642	NM_006546
hsa-let-7c-5p	MIMAT0000064	IGF2BP3	10643	NM_006547
hsa-let-7c-5p	MIMAT0000064	IGF2BP2	10644	NM_006548
hsa-let-7c-5p	MIMAT0000064	CLDN16	10686	NM_006580
hsa-miR-145-5p	MIMAT0000437	FUT9	10690	NM_006581
hsa-let-7c-5p	MIMAT0000064	POLQ	10721	NM_199420
hsa-miR-145-5p	MIMAT0000437	PHTF1	10745	NM_006608
hsa-let-7c-5p	MIMAT0000064	ARPP19	10776	XM_005254132
hsa-let-7c-5p	MIMAT0000064	ZNF268	10795	NM_152943
hsa-miR-145-5p	MIMAT0000437	FRS2	10818	NM_001042555
hsa-let-7c-5p	MIMAT0000064	PGRMC1	10857	NM_006667
hsa-miR-145-5p	MIMAT0000437	ADAM28	10863	NM_014265
hsa-miR-145-5p	MIMAT0000437	BLCAP	10904	NM_001167820
hsa-let-7c-5p	MIMAT0000064	SUB1	10923	XM_005248232
hsa-miR-145-5p	MIMAT0000437	C11orf58	10944	NM_014267
hsa-miR-145-5p	MIMAT0000437	AP3M2	10947	NM_001134296
hsa-miR-145-5p	MIMAT0000437	OS9	10956	NM_001017957
hsa-let-7c-5p	MIMAT0000064	IFI44L	10964	NM_006820
hsa-let-7c-5p	MIMAT0000064	ATF7	11016	XM_005268586
hsa-miR-145-5p	MIMAT0000437	RBPMS	11030	XM_005273387
hsa-miR-145-5p	MIMAT0000437	PAPD7	11044	XM_005248234
hsa-let-7c-5p	MIMAT0000064	SLC35D2	11046	NM_007001
hsa-miR-145-5p	MIMAT0000437	NUDT21	11051	NM_007006
hsa-let-7c-5p	MIMAT0000064	ABHD2	11057	NM_007011
hsa-miR-145-5p	MIMAT0000437	ABHD2	11057	NM_007011
hsa-let-7c-5p	MIMAT0000064	CNTRL	11064	XM_005251679
hsa-let-7c-5p	MIMAT0000064	ADAMTS8	11095	NM_007037
hsa-miR-145-5p	MIMAT0000437	ADAMTS5	11096	NM_007038
hsa-let-7c-5p	MIMAT0000064	BTN2A1	11120	NM_078476
hsa-miR-145-5p	MIMAT0000437	RCAN3	11123	NM_013441
hsa-let-7c-5p	MIMAT0000064	POLR3A	11128	NM_007055
hsa-let-7c-5p	MIMAT0000064	CELF3	11189	NM_007185
hsa-miR-145-5p	MIMAT0000437	RNF24	11237	NM_007219
hsa-let-7c-5p	MIMAT0000064	DDX19B	11269	NM_001014451
hsa-let-7c-5p	MIMAT0000064	KLF8	11279	NM_007250
hsa-let-7c-5p	MIMAT0000064	SCN11A	11280	NM_014139
hsa-let-7c-5p	MIMAT0000064	MGAT4A	11320	NM_012214
hsa-miR-145-5p	MIMAT0000437	MGAT4A	11320	NM_012214
hsa-let-7c-5p	MIMAT0000064	MGLL	11343	NM_007283
hsa-miR-145-5p	MIMAT0000437	MGLL	11343	NM_007283
hsa-let-7c-5p	MIMAT0000064	TFEC	22797	XM_005250231
hsa-miR-145-5p	MIMAT0000437	TFEC	22797	XM_005250231
hsa-let-7c-5p	MIMAT0000064	ITGA11	22801	XM_005254227
hsa-let-7c-5p	MIMAT0000064	MRAS	22808	NM_012219
hsa-let-7c-5p	MIMAT0000064	DLGAP4	22839	NM_014902
hsa-miR-145-5p	MIMAT0000437	CPEB3	22849	XM_005269630
hsa-let-7c-5p	MIMAT0000064	FNDC3A	22862	NM_001278438
hsa-miR-145-5p	MIMAT0000437	FNDC3A	22862	NM_001278438
hsa-miR-145-5p	MIMAT0000437	ANKRD6	22881	NM_001242811
hsa-let-7c-5p	MIMAT0000064	WDR37	22884	XM_005252417
hsa-miR-145-5p	MIMAT0000437	WDR37	22884	XM_005252417
hsa-let-7c-5p	MIMAT0000064	ARHGEF15	22899	NM_173728
hsa-miR-145-5p	MIMAT0000437	PLA2R1	22925	NM_007366
hsa-miR-145-5p	MIMAT0000437	ATF6	22926	NM_007348
hsa-miR-145-5p	MIMAT0000437	SEPHS1	22929	NM_012247
hsa-let-7c-5p	MIMAT0000064	RAB18	22931	NM_001256410
hsa-miR-145-5p	MIMAT0000437	RAB18	22931	NM_001256410
hsa-miR-145-5p	MIMAT0000437	ELL2	22936	NM_012081
hsa-miR-145-5p	MIMAT0000437	SHANK2	22941	NM_012309
hsa-let-7c-5p	MIMAT0000064	TRIM32	22954	XM_005251814
hsa-miR-145-5p	MIMAT0000437	WDFY3	23001	NM_014991
hsa-miR-145-5p	MIMAT0000437	DAAM1	23002	XM_005267431
hsa-miR-145-5p	MIMAT0000437	UNC13A	23025	XM_005259821
hsa-miR-145-5p	MIMAT0000437	XPO7	23039	NM_015024
hsa-miR-145-5p	MIMAT0000437	MON2	23041	NM_001278472
hsa-miR-145-5p	MIMAT0000437	CAND2	23066	NM_001162499
hsa-miR-145-5p	MIMAT0000437	ERP44	23071	NM_015051
hsa-miR-145-5p	MIMAT0000437	ZC3H13	23091	XM_005266303
hsa-let-7c-5p	MIMAT0000064	ARHGAP26	23092	XM_005268398
hsa-miR-145-5p	MIMAT0000437	ARHGAP26	23092	XM_005268398
hsa-miR-145-5p	MIMAT0000437	KIF1B	23095	XM_005263433
hsa-miR-145-5p	MIMAT0000437	ZBTB43	23099	XM_005251835
hsa-miR-145-5p	MIMAT0000437	TBC1D2B	23102	NM_144572
hsa-let-7c-5p	MIMAT0000064	HIC2	23119	NM_015094
hsa-miR-145-5p	MIMAT0000437	HIC2	23119	XM_005261395
hsa-miR-145-5p	MIMAT0000437	CLASP2	23122	NM_001207044
hsa-let-7c-5p	MIMAT0000064	PLXND1	23129	NM_015103
hsa-let-7c-5p	MIMAT0000064	ZC3H3	23144	XM_005250847
hsa-let-7c-5p	MIMAT0000064	FRMD4B	23150	NM_015123
hsa-miR-145-5p	MIMAT0000437	WDR43	23160	NM_015131
hsa-miR-145-5p	MIMAT0000437	SLC35D1	23169	NM_015139
hsa-miR-145-5p	MIMAT0000437	ZCCHC14	23174	NM_015144
hsa-miR-145-5p	MIMAT0000437	PASK	23178	NM_001252124
hsa-let-7c-5p	MIMAT0000064	DIP2A	23181	NM_015151
hsa-miR-145-5p	MIMAT0000437	LARP4B	23185	NM_015155
hsa-let-7c-5p	MIMAT0000064	ATG4B	23192	XM_005246992
hsa-let-7c-5p	MIMAT0000064	SYT11	23208	NM_152280
hsa-miR-145-5p	MIMAT0000437	MLC1	23209	NM_015166
hsa-miR-145-5p	MIMAT0000437	ZC3H4	23211	NM_015168
hsa-miR-145-5p	MIMAT0000437	PRRC2C	23215	XM_005245020
hsa-miR-145-5p	MIMAT0000437	FBXO28	23219	NM_015176
hsa-let-7c-5p	MIMAT0000064	DTX4	23220	NM_015177
hsa-miR-145-5p	MIMAT0000437	DTX4	23220	NM_015177
hsa-miR-145-5p	MIMAT0000437	PLCL2	23228	NM_001144382
hsa-let-7c-5p	MIMAT0000064	TBC1D12	23232	NM_015188
hsa-miR-145-5p	MIMAT0000437	TBC1D12	23232	NM_015188
hsa-let-7c-5p	MIMAT0000064	PACS2	23241	NM_001100913
hsa-let-7c-5p	MIMAT0000064	ANKRD28	23243	NM_001195098
hsa-miR-145-5p	MIMAT0000437	ANKRD28	23243	NM_001195098
hsa-miR-145-5p	MIMAT0000437	ANKRD12	23253	NM_001204056
hsa-miR-145-5p	MIMAT0000437	MCF2L	23263	XM_005268310
hsa-miR-145-5p	MIMAT0000437	TSPYL4	23270	NM_021648
hsa-miR-145-5p	MIMAT0000437	CAMSAP2	23271	NM_203459
hsa-miR-145-5p	MIMAT0000437	CLEC16A	23274	NM_015226
hsa-let-7c-5p	MIMAT0000064	ACSL6	23305	XM_005271939
hsa-let-7c-5p	MIMAT0000064	TMEM194A	23306	NM_001130963
hsa-let-7c-5p	MIMAT0000064	KIAA0930	23313	NM_015264
hsa-miR-145-5p	MIMAT0000437	KIAA0930	23313	NM_015264
hsa-miR-145-5p	MIMAT0000437	TRIM2	23321	NM_001130067
hsa-miR-145-5p	MIMAT0000437	NEDD4L	23327	XM_005266657
hsa-miR-145-5p	MIMAT0000437	SMCHD1	23347	NM_015295
hsa-miR-145-5p	MIMAT0000437	DOCK9	23348	NM_001130048
hsa-let-7c-5p	MIMAT0000064	KHNYN	23351	NM_015299
hsa-miR-145-5p	MIMAT0000437	FAM189A1	23359	XM_005254261
hsa-miR-145-5p	MIMAT0000437	PSD3	23362	NM_015310
hsa-miR-145-5p	MIMAT0000437	ARHGEF12	23365	NM_015313
hsa-miR-145-5p	MIMAT0000437	CRTC1	23373	NM_001098482
hsa-let-7c-5p	MIMAT0000064	UFL1	23376	NM_015323
hsa-miR-145-5p	MIMAT0000437	SRGAP2	23380	XM_005277510
hsa-miR-145-5p	MIMAT0000437	ATP13A2	23400	NM_022089
hsa-miR-145-5p	MIMAT0000437	SIRT5	23408	NM_031244
hsa-miR-145-5p	MIMAT0000437	SIRT3	23410	NM_012239
hsa-miR-145-5p	MIMAT0000437	SLC7A8	23428	NM_012244
hsa-miR-145-5p	MIMAT0000437	ATP1B4	23439	NM_001142447
hsa-let-7c-5p	MIMAT0000064	ABCB9	23457	NM_019625
hsa-let-7c-5p	MIMAT0000064	ICMT	23463	NM_012405
hsa-let-7c-5p	MIMAT0000064	CBX5	23468	NM_001127322
hsa-miR-145-5p	MIMAT0000437	TRAM1	23471	NM_014294
hsa-let-7c-5p	MIMAT0000064	ZFYVE26	23503	NM_015346
hsa-miR-145-5p	MIMAT0000437	ZFYVE26	23503	NM_015346
hsa-miR-145-5p	MIMAT0000437	KCTD2	23510	NM_015353
hsa-miR-145-5p	MIMAT0000437	CASP14	23581	NM_012114
hsa-let-7c-5p	MIMAT0000064	SMUG1	23583	NM_014311
hsa-miR-145-5p	MIMAT0000437	TMEM50A	23585	XM_005245816
hsa-let-7c-5p	MIMAT0000064	AMACR	23600	NM_014324
hsa-let-7c-5p	MIMAT0000064	DAPK2	23604	NM_014326
hsa-miR-145-5p	MIMAT0000437	BACE1	23621	NM_012104
hsa-let-7c-5p	MIMAT0000064	TMEM2	23670	NM_013390
hsa-miR-145-5p	MIMAT0000437	STX12	23673	NM_177424
hsa-miR-145-5p	MIMAT0000437	PRKD3	23683	NM_005813
hsa-let-7c-5p	MIMAT0000064	IL17RA	23765	NM_014339
hsa-miR-145-5p	MIMAT0000437	KIAA1549L	25758	NM_012194
hsa-let-7c-5p	MIMAT0000064	RAB3GAP2	25782	NM_012414
hsa-miR-145-5p	MIMAT0000437	ARIH1	25820	NM_005744
hsa-let-7c-5p	MIMAT0000064	BACE2	25825	NM_012105
hsa-miR-145-5p	MIMAT0000437	BACE2	25825	NM_012105
hsa-let-7c-5p	MIMAT0000064	PARM1	25849	NM_015393
hsa-let-7c-5p	MIMAT0000064	ZNF473	25888	XM_005258717
hsa-let-7c-5p	MIMAT0000064	AHCTF1	25909	NM_015446
hsa-miR-145-5p	MIMAT0000437	NSL1	25936	NM_001042549
hsa-miR-145-5p	MIMAT0000437	PVRL3	25945	NM_015480
hsa-let-7c-5p	MIMAT0000064	KIAA1429	25962	NM_015496
hsa-let-7c-5p	MIMAT0000064	PARS2	25973	NM_152268
hsa-let-7c-5p	MIMAT0000064	MMACHC	25974	NM_015506
hsa-miR-145-5p	MIMAT0000437	CHMP2B	25978	NM_014043
hsa-miR-145-5p	MIMAT0000437	SNED1	25992	NM_001080437
hsa-let-7c-5p	MIMAT0000064	LRIG1	26018	XM_005264724
hsa-miR-145-5p	MIMAT0000437	IPCEF1	26034	NM_001130699
hsa-miR-145-5p	MIMAT0000437	GLCE	26035	XM_005254298
hsa-miR-145-5p	MIMAT0000437	ZNF451	26036	NM_001257273
hsa-let-7c-5p	MIMAT0000064	LTN1	26046	NM_015565
hsa-miR-145-5p	MIMAT0000437	APPL1	26060	NM_012096
hsa-miR-145-5p	MIMAT0000437	DECR2	26063	XM_005255246
hsa-let-7c-5p	MIMAT0000064	WIPI2	26100	NM_001278299
hsa-miR-145-5p	MIMAT0000437	SERBP1	26135	NM_001018067
hsa-miR-145-5p	MIMAT0000437	ZBTB20	26137	XM_005247336
hsa-miR-145-5p	MIMAT0000437	TRAF3IP1	26146	NM_015650
hsa-miR-145-5p	MIMAT0000437	PTPN22	26191	NM_015967
hsa-miR-145-5p	MIMAT0000437	FBXL3	26224	XM_005266335
hsa-miR-145-5p	MIMAT0000437	BLOC1S6	26258	NM_012388
hsa-let-7c-5p	MIMAT0000064	FBXO22	26263	NM_147188
hsa-miR-145-5p	MIMAT0000437	FBXO9	26268	NM_033480
hsa-miR-145-5p	MIMAT0000437	SLC17A5	26503	XM_005248711
hsa-miR-145-5p	MIMAT0000437	CYFIP2	26999	NM_001037332
hsa-let-7c-5p	MIMAT0000064	NPHP3	27031	NM_153240
hsa-miR-145-5p	MIMAT0000437	EIF2AK1	27102	NM_001134335
hsa-miR-145-5p	MIMAT0000437	PDE7B	27115	XM_005266931
hsa-let-7c-5p	MIMAT0000064	PALD1	27143	NM_014431
hsa-miR-145-5p	MIMAT0000437	SERP1	27230	NM_014445
hsa-miR-145-5p	MIMAT0000437	PDCD4	27250	NM_145341
hsa-miR-145-5p	MIMAT0000437	VENTX	27287	NM_014468
hsa-let-7c-5p	MIMAT0000064	POLL	27343	NM_001174084
hsa-miR-145-5p	MIMAT0000437	KCNMB4	27345	NM_014505
hsa-miR-145-5p	MIMAT0000437	TMEM97	27346	NM_014573
hsa-miR-145-5p	MIMAT0000437	FLVCR1	28982	NM_014053
hsa-miR-145-5p	MIMAT0000437	NOB1	28987	NM_014062
hsa-miR-145-5p	MIMAT0000437	COMMD5	28991	NM_014066
hsa-miR-145-5p	MIMAT0000437	HIPK2	28996	NM_001113239
hsa-miR-145-5p	MIMAT0000437	ZBTB44	29068	XM_005271521
hsa-let-7c-5p	MIMAT0000064	CCDC113	29070	NM_014157
hsa-miR-145-5p	MIMAT0000437	GTPBP8	29083	NM_014170
hsa-let-7c-5p	MIMAT0000064	TMOD2	29767	NM_014548
hsa-miR-145-5p	MIMAT0000437	TMOD2	29767	NM_014548
hsa-let-7c-5p	MIMAT0000064	ABT1	29777	NM_013375
hsa-let-7c-5p	MIMAT0000064	PARVB	29780	NM_001003828
hsa-miR-145-5p	MIMAT0000437	SENP1	29843	NM_001267595
hsa-let-7c-5p	MIMAT0000064	ICOS	29851	XM_005246482
hsa-let-7c-5p	MIMAT0000064	RBM15B	29890	NM_013286
hsa-miR-145-5p	MIMAT0000437	SNX15	29907	NM_013306
hsa-let-7c-5p	MIMAT0000064	SNX11	29916	NM_152244
hsa-let-7c-5p	MIMAT0000064	GPR132	29933	NM_001278694
hsa-miR-145-5p	MIMAT0000437	PNMA3	29944	NM_013364
hsa-miR-145-5p	MIMAT0000437	POMT2	29954	NM_013382
hsa-let-7c-5p	MIMAT0000064	SLC25A24	29957	NM_013386
hsa-let-7c-5p	MIMAT0000064	A1CF	29974	NM_001198819
hsa-miR-145-5p	MIMAT0000437	SH3KBP1	30011	NM_031892
hsa-miR-145-5p	MIMAT0000437	SOCS7	30837	NM_014598
hsa-let-7c-5p	MIMAT0000064	PLA2G3	50487	NM_015715
hsa-miR-145-5p	MIMAT0000437	GEMIN4	50628	XM_005256669
hsa-miR-145-5p	MIMAT0000437	F11R	50848	NM_016946
hsa-miR-145-5p	MIMAT0000437	PDE11A	50940	NM_016953
hsa-miR-145-5p	MIMAT0000437	MED31	51003	NM_016060
hsa-miR-145-5p	MIMAT0000437	DERL2	51009	NM_016041
hsa-miR-145-5p	MIMAT0000437	SLMO2	51012	NM_016045
hsa-let-7c-5p	MIMAT0000064	GOLT1B	51026	NM_016072
hsa-miR-145-5p	MIMAT0000437	ST8SIA3	51046	NM_015879
hsa-miR-145-5p	MIMAT0000437	ABHD17B	51104	NM_001025780
hsa-miR-145-5p	MIMAT0000437	PHF20L1	51105	NM_016018
hsa-let-7c-5p	MIMAT0000064	HSPA14	51182	NM_001278205
hsa-miR-145-5p	MIMAT0000437	HSPA14	51182	NM_001278205
hsa-let-7c-5p	MIMAT0000064	CPA4	51200	NM_016352
hsa-miR-145-5p	MIMAT0000437	FAM203A	51236	NM_016458
hsa-miR-145-5p	MIMAT0000437	COX16	51241	NM_016468
hsa-miR-145-5p	MIMAT0000437	KLF3	51274	NM_016531
hsa-let-7c-5p	MIMAT0000064	GCNT4	51301	XM_005248530
hsa-miR-145-5p	MIMAT0000437	UCHL5	51377	NM_001199261
hsa-miR-145-5p	MIMAT0000437	WNT16	51384	NM_057168
hsa-miR-145-5p	MIMAT0000437	HPCAL4	51440	NM_016257
hsa-let-7c-5p	MIMAT0000064	SFMBT1	51460	XM_005265220
hsa-miR-145-5p	MIMAT0000437	SFMBT1	51460	XM_005265220
hsa-let-7c-5p	MIMAT0000064	ANKFY1	51479	NM_001257999
hsa-miR-145-5p	MIMAT0000437	ANKFY1	51479	NM_001257999
hsa-miR-145-5p	MIMAT0000437	VPS54	51542	XM_005264363
hsa-miR-145-5p	MIMAT0000437	RAB14	51552	NM_016322
hsa-miR-145-5p	MIMAT0000437	PEX5L	51555	NM_016559
hsa-miR-145-5p	MIMAT0000437	ARMCX3	51566	XM_005262141
hsa-let-7c-5p	MIMAT0000064	UFM1	51569	XM_005266418
hsa-miR-145-5p	MIMAT0000437	GDE1	51573	NM_016641
hsa-let-7c-5p	MIMAT0000064	TAF9B	51616	XM_005262142
hsa-let-7c-5p	MIMAT0000064	NAA38	51691	NM_016200
hsa-miR-145-5p	MIMAT0000437	RAB23	51715	NM_016277
hsa-miR-145-5p	MIMAT0000437	TM7SF3	51768	NM_016551
hsa-miR-145-5p	MIMAT0000437	ZAK	51776	NM_133646
hsa-let-7c-5p	MIMAT0000064	ATAD2B	54454	XM_005264372
hsa-miR-145-5p	MIMAT0000437	ATAD2B	54454	XM_005264372
hsa-miR-145-5p	MIMAT0000437	XRN1	54464	NM_019001
hsa-let-7c-5p	MIMAT0000064	MIEF1	54471	XM_005261651
hsa-miR-145-5p	MIMAT0000437	RNF216	54476	NM_207111
hsa-let-7c-5p	MIMAT0000064	TRMT13	54482	NM_019083
hsa-miR-145-5p	MIMAT0000437	RBM47	54502	NM_001098634
hsa-let-7c-5p	MIMAT0000064	CCDC93	54520	NM_019044
hsa-miR-145-5p	MIMAT0000437	CCDC93	54520	NM_019044
hsa-let-7c-5p	MIMAT0000064	ROBO4	54538	NM_019055
hsa-miR-145-5p	MIMAT0000437	RNF186	54546	NM_019062
hsa-let-7c-5p	MIMAT0000064	CCNJ	54619	NM_001134375
hsa-miR-145-5p	MIMAT0000437	HES2	54626	XM_005263478
hsa-miR-145-5p	MIMAT0000437	ZNHIT6	54680	NM_017953
hsa-miR-145-5p	MIMAT0000437	SLC35F2	54733	NM_017515
hsa-miR-145-5p	MIMAT0000437	GATAD2A	54815	XM_005259956
hsa-let-7c-5p	MIMAT0000064	GDAP2	54834	NM_017686
hsa-let-7c-5p	MIMAT0000064	ARHGEF38	54848	NM_001242729
hsa-miR-145-5p	MIMAT0000437	ARHGEF38	54848	NM_001242729
hsa-let-7c-5p	MIMAT0000064	DEF8	54849	XM_005256316
hsa-let-7c-5p	MIMAT0000064	FBXL12	54850	XM_005259966
hsa-let-7c-5p	MIMAT0000064	ANKRD49	54851	NM_017704
hsa-let-7c-5p	MIMAT0000064	ST7L	54879	NM_017744
hsa-let-7c-5p	MIMAT0000064	PQLC2	54896	NM_001040125
hsa-miR-145-5p	MIMAT0000437	CASZ1	54897	NM_001079843
hsa-miR-145-5p	MIMAT0000437	ELOVL2	54898	NM_017770
hsa-let-7c-5p	MIMAT0000064	CDKAL1	54901	XM_005249201
hsa-miR-145-5p	MIMAT0000437	CDKAL1	54901	XM_005249201
hsa-let-7c-5p	MIMAT0000064	SEMA4C	54910	XM_005263973
hsa-let-7c-5p	MIMAT0000064	CMTM6	54918	NM_017801
hsa-let-7c-5p	MIMAT0000064	PARP16	54956	XM_005254516
hsa-miR-145-5p	MIMAT0000437	C1orf56	54964	NM_017860
hsa-let-7c-5p	MIMAT0000064	FAM118A	55007	NM_001104595
hsa-miR-145-5p	MIMAT0000437	MARCH1	55016	XM_005263085
hsa-let-7c-5p	MIMAT0000064	PDPR	55066	NM_017990
hsa-miR-145-5p	MIMAT0000437	PDPR	55066	XM_005256016
hsa-let-7c-5p	MIMAT0000064	C9orf40	55071	NM_017998
hsa-miR-145-5p	MIMAT0000437	MED9	55090	NM_018019
hsa-miR-145-5p	MIMAT0000437	ATG2B	55102	NM_018036
hsa-let-7c-5p	MIMAT0000064	BSDC1	55108	XM_005270985
hsa-miR-145-5p	MIMAT0000437	MAGOHB	55110	NM_018048
hsa-let-7c-5p	MIMAT0000064	XKR8	55113	NM_018053
hsa-miR-145-5p	MIMAT0000437	SLC6A15	55117	NM_182767
hsa-let-7c-5p	MIMAT0000064	PRPF38B	55119	NM_018061
hsa-let-7c-5p	MIMAT0000064	FIGN	55137	NM_018086
hsa-miR-145-5p	MIMAT0000437	UBR7	55148	NM_175748
hsa-let-7c-5p	MIMAT0000064	DARS2	55157	XM_005245299
hsa-miR-145-5p	MIMAT0000437	TMEM33	55161	NM_018126
hsa-let-7c-5p	MIMAT0000064	PLEKHG6	55200	NM_001144857
hsa-let-7c-5p	MIMAT0000064	C11orf57	55216	NM_018195
hsa-let-7c-5p	MIMAT0000064	STEAP3	55240	NM_182915
hsa-miR-145-5p	MIMAT0000437	CCDC25	55246	NM_018246
hsa-miR-145-5p	MIMAT0000437	TMEM206	55248	NM_018252
hsa-let-7c-5p	MIMAT0000064	NUDT15	55270	NM_018283
hsa-miR-145-5p	MIMAT0000437	IMP3	55272	NM_018285
hsa-miR-145-5p	MIMAT0000437	VPS53	55275	NM_001128159
hsa-let-7c-5p	MIMAT0000064	DDX19A	55308	XM_005256030
hsa-let-7c-5p	MIMAT0000064	TMEM144	55314	NM_018342
hsa-miR-145-5p	MIMAT0000437	TMEM144	55314	NM_018342
hsa-let-7c-5p	MIMAT0000064	SLC29A3	55315	NM_001174098
hsa-let-7c-5p	MIMAT0000064	PLCXD1	55344	NM_018390
hsa-miR-145-5p	MIMAT0000437	PI4K2A	55361	NM_018425
hsa-miR-145-5p	MIMAT0000437	LRRC59	55379	NM_018509
hsa-miR-145-5p	MIMAT0000437	ZNF331	55422	NM_018555
hsa-let-7c-5p	MIMAT0000064	YOD1	55432	NM_018566
hsa-miR-145-5p	MIMAT0000437	TRIM36	55521	NM_018700
hsa-let-7c-5p	MIMAT0000064	RBM38	55544	XM_005260445
hsa-let-7c-5p	MIMAT0000064	CDV3	55573	NM_001134422
hsa-miR-145-5p	MIMAT0000437	AMBRA1	55626	XM_005253010
hsa-let-7c-5p	MIMAT0000064	HIF1AN	55662	NM_017902
hsa-miR-145-5p	MIMAT0000437	CDC37L1	55664	NM_017913
hsa-let-7c-5p	MIMAT0000064	SLC30A6	55676	NM_001193513
hsa-miR-145-5p	MIMAT0000437	FRMD4A	55691	XM_005252489
hsa-let-7c-5p	MIMAT0000064	IPO9	55705	NM_018085
hsa-let-7c-5p	MIMAT0000064	FAM178A	55719	NM_018121
hsa-miR-145-5p	MIMAT0000437	FAM178A	55719	NM_018121
hsa-miR-145-5p	MIMAT0000437	FAM222B	55731	XM_005258002
hsa-miR-145-5p	MIMAT0000437	C1orf106	55765	NM_001142569
hsa-miR-145-5p	MIMAT0000437	TBC1D23	55773	NM_001199198
hsa-let-7c-5p	MIMAT0000064	FGD6	55785	NM_018351
hsa-let-7c-5p	MIMAT0000064	TXLNG	55787	NM_018360
hsa-miR-145-5p	MIMAT0000437	MBNL3	55796	XM_005262434
hsa-miR-145-5p	MIMAT0000437	SCN3B	55800	NM_001040151
hsa-let-7c-5p	MIMAT0000064	BIN3	55909	NM_018688
hsa-miR-145-5p	MIMAT0000437	LANCL2	55915	NM_018697
hsa-let-7c-5p	MIMAT0000064	BCAP29	55973	NM_018844
hsa-let-7c-5p	MIMAT0000064	TMEM234	56063	XM_005271044
hsa-let-7c-5p	MIMAT0000064	CRTAM	56253	NM_019604
hsa-let-7c-5p	MIMAT0000064	GPCPD1	56261	XM_005260759
hsa-let-7c-5p	MIMAT0000064	CTPS2	56474	NM_001144002
hsa-miR-145-5p	MIMAT0000437	TMEM9B	56674	NM_020644
hsa-miR-145-5p	MIMAT0000437	NRIP3	56675	NM_020645
hsa-let-7c-5p	MIMAT0000064	RAD18	56852	NM_020165
hsa-miR-145-5p	MIMAT0000437	RAD18	56852	NM_020165
hsa-let-7c-5p	MIMAT0000064	CDC42SE1	56882	NM_001038707
hsa-miR-145-5p	MIMAT0000437	AGPAT4	56895	NM_020133
hsa-let-7c-5p	MIMAT0000064	C15orf39	56905	XM_005254552
hsa-let-7c-5p	MIMAT0000064	C1GALT1	56913	XM_005249812
hsa-miR-145-5p	MIMAT0000437	OTOR	56914	NM_020157
hsa-let-7c-5p	MIMAT0000064	SMARCAD1	56916	NM_001128429
hsa-let-7c-5p	MIMAT0000064	LHX9	56956	XM_005245350
hsa-miR-145-5p	MIMAT0000437	ATXN7L3	56970	XM_005257526
hsa-let-7c-5p	MIMAT0000064	BBX	56987	NM_001142568
hsa-miR-145-5p	MIMAT0000437	TULP4	56995	XM_005267057
hsa-let-7c-5p	MIMAT0000064	SLC12A9	56996	NM_020246
hsa-miR-145-5p	MIMAT0000437	CABP4	57010	NM_145200
hsa-let-7c-5p	MIMAT0000064	ENTPD7	57089	NM_020354
hsa-miR-145-5p	MIMAT0000437	ZNF695	57116	NM_020394
hsa-miR-145-5p	MIMAT0000437	ASPHD2	57168	NM_020437
hsa-let-7c-5p	MIMAT0000064	ZNF248	57209	NM_021045
hsa-let-7c-5p	MIMAT0000064	SLC45A4	57210	XM_005251001
hsa-let-7c-5p	MIMAT0000064	SPRYD7	57213	NM_020456
hsa-let-7c-5p	MIMAT0000064	VANGL2	57216	NM_020335
hsa-let-7c-5p	MIMAT0000064	LYRM2	57226	NM_020466
hsa-miR-145-5p	MIMAT0000437	SLC4A10	57282	NM_001178016
hsa-let-7c-5p	MIMAT0000064	MRS2	57380	NM_020662
hsa-miR-145-5p	MIMAT0000437	USP31	57478	NM_020718
hsa-let-7c-5p	MIMAT0000064	NLN	57486	NM_020726
hsa-miR-145-5p	MIMAT0000437	NLN	57486	NM_020726
hsa-let-7c-5p	MIMAT0000064	ODF2L	57489	NM_001184766
hsa-miR-145-5p	MIMAT0000437	ODF2L	57489	NM_001007022
hsa-miR-145-5p	MIMAT0000437	RIMKLB	57494	XM_005253436
hsa-miR-145-5p	MIMAT0000437	MKL2	57496	NM_014048
hsa-let-7c-5p	MIMAT0000064	INTS2	57508	NM_020748
hsa-let-7c-5p	MIMAT0000064	STARD9	57519	NM_020759
hsa-miR-145-5p	MIMAT0000437	HECW2	57520	NM_020760
hsa-let-7c-5p	MIMAT0000064	SRGAP1	57522	XM_005269042
hsa-miR-145-5p	MIMAT0000437	SRGAP1	57522	NM_020762
hsa-let-7c-5p	MIMAT0000064	NYNRIN	57523	NM_025081
hsa-let-7c-5p	MIMAT0000064	PCDH19	57526	NM_001184880
hsa-miR-145-5p	MIMAT0000437	NUFIP2	57532	NM_020772
hsa-miR-145-5p	MIMAT0000437	ALPK3	57538	NM_020778
hsa-miR-145-5p	MIMAT0000437	SEMA6A	57556	XM_005272041
hsa-let-7c-5p	MIMAT0000064	IFT80	57560	XM_005247675
hsa-miR-145-5p	MIMAT0000437	FAM135A	57579	NM_020819
hsa-let-7c-5p	MIMAT0000064	BEGAIN	57596	NM_001159531
hsa-miR-145-5p	MIMAT0000437	WDR48	57599	XM_005265346
hsa-let-7c-5p	MIMAT0000064	FNIP2	57600	XM_005263156
hsa-miR-145-5p	MIMAT0000437	KIAA1467	57613	NM_020853
hsa-miR-145-5p	MIMAT0000437	SHROOM3	57619	NM_020859
hsa-miR-145-5p	MIMAT0000437	ZBTB2	57621	NM_020861
hsa-miR-145-5p	MIMAT0000437	LRCH2	57631	NM_020871
hsa-let-7c-5p	MIMAT0000064	ZSWIM5	57643	NM_020883
hsa-miR-145-5p	MIMAT0000437	PHRF1	57661	NM_020901
hsa-miR-145-5p	MIMAT0000437	RNF213	57674	NM_001256071
hsa-miR-145-5p	MIMAT0000437	ZSWIM6	57688	NM_020928
hsa-let-7c-5p	MIMAT0000064	SEMA4G	57715	XM_005270009
hsa-let-7c-5p	MIMAT0000064	IGDCC4	57722	NM_020962
hsa-miR-145-5p	MIMAT0000437	RBAK	57786	NM_021163
hsa-miR-145-5p	MIMAT0000437	GATAD1	57798	NM_021167
hsa-miR-145-5p	MIMAT0000437	SLC4A5	57835	NM_133478
hsa-let-7c-5p	MIMAT0000064	TP53INP2	58476	NM_021202
hsa-let-7c-5p	MIMAT0000064	TRAPPC1	58485	NM_021210
hsa-miR-145-5p	MIMAT0000437	ABHD17C	58489	NM_021214
hsa-let-7c-5p	MIMAT0000064	SNX6	58533	XM_005267957
hsa-let-7c-5p	MIMAT0000064	IL22RA1	58985	XM_005245952
hsa-miR-145-5p	MIMAT0000437	BACH2	60468	NM_021813
hsa-miR-145-5p	MIMAT0000437	PPCDC	60490	NM_021823
hsa-let-7c-5p	MIMAT0000064	SLC22A23	63027	XM_005249285
hsa-miR-145-5p	MIMAT0000437	XPNPEP3	63929	NM_022098
hsa-miR-145-5p	MIMAT0000437	PRDM15	63977	NM_001040424
hsa-let-7c-5p	MIMAT0000064	SNX16	64089	NM_022133
hsa-miR-145-5p	MIMAT0000437	EPB41L4A	64097	XM_005272043
hsa-let-7c-5p	MIMAT0000064	XYLT1	64131	NM_022166
hsa-miR-145-5p	MIMAT0000437	PAPD5	64282	NM_001040284
hsa-miR-145-5p	MIMAT0000437	ZSCAN31	64288	XM_005249296
hsa-miR-145-5p	MIMAT0000437	XPO4	64328	NM_022459
hsa-miR-145-5p	MIMAT0000437	NFKBIZ	64332	NM_031419
hsa-let-7c-5p	MIMAT0000064	HIF3A	64344	XM_005259152
hsa-miR-145-5p	MIMAT0000437	MPP5	64398	NM_022474
hsa-let-7c-5p	MIMAT0000064	CDH22	64405	NM_021248
hsa-let-7c-5p	MIMAT0000064	CPEB1	64506	NM_030594
hsa-let-7c-5p	MIMAT0000064	PLA2G2F	64600	NM_022819
hsa-miR-145-5p	MIMAT0000437	NUCKS1	64710	NM_022731
hsa-miR-145-5p	MIMAT0000437	ACBD3	64746	NM_022735
hsa-miR-145-5p	MIMAT0000437	GAREM	64762	NM_001242409
hsa-let-7c-5p	MIMAT0000064	CREB3L2	64764	NM_194071
hsa-miR-145-5p	MIMAT0000437	CREB3L2	64764	NM_194071
hsa-miR-145-5p	MIMAT0000437	FNDC3B	64778	NM_001135095
hsa-let-7c-5p	MIMAT0000064	AEN	64782	XM_005254967
hsa-miR-145-5p	MIMAT0000437	GINS3	64785	NM_001126129
hsa-miR-145-5p	MIMAT0000437	TBC1D15	64786	NM_001146214
hsa-miR-145-5p	MIMAT0000437	DDX31	64794	XM_005272206
hsa-miR-145-5p	MIMAT0000437	SLC13A3	64849	XM_005260513
hsa-miR-145-5p	MIMAT0000437	USP46	64854	NM_001134223
hsa-let-7c-5p	MIMAT0000064	DCLRE1B	64858	NM_022836
hsa-miR-145-5p	MIMAT0000437	BCL11B	64919	NM_138576
hsa-miR-145-5p	MIMAT0000437	REEP1	65055	XM_005264502
hsa-miR-145-5p	MIMAT0000437	GPBP1	65056	NM_022913
hsa-miR-145-5p	MIMAT0000437	CDK15	65061	NM_001261435
hsa-miR-145-5p	MIMAT0000437	UPF3A	65110	NM_023011
hsa-miR-145-5p	MIMAT0000437	SPATS2	65244	NM_023071
hsa-miR-145-5p	MIMAT0000437	UBE2Z	65264	NM_023079
hsa-let-7c-5p	MIMAT0000064	PHACTR4	65979	NM_001048183
hsa-let-7c-5p	MIMAT0000064	ZBTB10	65986	NM_001105539
hsa-miR-145-5p	MIMAT0000437	ZBTB10	65986	NM_001105539
hsa-miR-145-5p	MIMAT0000437	LYNX1	66004	NM_177457
hsa-let-7c-5p	MIMAT0000064	DDA1	79016	NM_024050
hsa-miR-145-5p	MIMAT0000437	DDX54	79039	NM_001111322
hsa-let-7c-5p	MIMAT0000064	TSEN34	79042	NM_024075
hsa-miR-145-5p	MIMAT0000437	KCTD15	79047	NM_024076
hsa-let-7c-5p	MIMAT0000064	C1orf116	79098	NM_023938
hsa-let-7c-5p	MIMAT0000064	GNPTAB	79158	NM_024312
hsa-let-7c-5p	MIMAT0000064	ZNF343	79175	NM_024325
hsa-let-7c-5p	MIMAT0000064	EFHD2	79180	NM_024329
hsa-let-7c-5p	MIMAT0000064	ZNF557	79230	NM_024341
hsa-miR-145-5p	MIMAT0000437	NKAIN1	79570	NM_024522
hsa-miR-145-5p	MIMAT0000437	GCC1	79571	NM_024523
hsa-miR-145-5p	MIMAT0000437	C10orf76	79591	NM_024541
hsa-miR-145-5p	MIMAT0000437	CERS4	79603	XM_005272494
hsa-miR-145-5p	MIMAT0000437	CCNJL	79616	NM_024565
hsa-let-7c-5p	MIMAT0000064	HMBOX1	79618	XM_005273634
hsa-miR-145-5p	MIMAT0000437	HMBOX1	79618	XM_005273634
hsa-miR-145-5p	MIMAT0000437	ARMC7	79637	NM_024585
hsa-miR-145-5p	MIMAT0000437	C22orf46	79640	NM_001142964
hsa-let-7c-5p	MIMAT0000064	SRD5A3	79644	NM_024592
hsa-let-7c-5p	MIMAT0000064	USB1	79650	NM_001204911
hsa-let-7c-5p	MIMAT0000064	PARP8	79668	NM_001178055
hsa-miR-145-5p	MIMAT0000437	PARP8	79668	NM_001178055
hsa-miR-145-5p	MIMAT0000437	SMC6	79677	XM_005262627
hsa-let-7c-5p	MIMAT0000064	ZNF322	79692	NM_001242797
hsa-let-7c-5p	MIMAT0000064	THAP9	79725	NM_024672
hsa-let-7c-5p	MIMAT0000064	LIN28A	79727	NM_024674
hsa-miR-145-5p	MIMAT0000437	ZFHX4	79776	NM_024721
hsa-let-7c-5p	MIMAT0000064	KLHL36	79786	XM_005256149
hsa-miR-145-5p	MIMAT0000437	CLMN	79789	NM_024734
hsa-let-7c-5p	MIMAT0000064	C12orf49	79794	XM_005253937
hsa-miR-145-5p	MIMAT0000437	CARF	79800	NM_001104586
hsa-miR-145-5p	MIMAT0000437	AGMAT	79814	NM_024758
hsa-let-7c-5p	MIMAT0000064	MOB3B	79817	NM_024761
hsa-let-7c-5p	MIMAT0000064	ARHGAP28	79822	XM_005258144
hsa-miR-145-5p	MIMAT0000437	ARHGAP28	79822	XM_005258144
hsa-miR-145-5p	MIMAT0000437	QSER1	79832	NM_001076786
hsa-miR-145-5p	MIMAT0000437	PEAK1	79834	XM_005254672
hsa-let-7c-5p	MIMAT0000064	CCDC134	79879	XM_005261749
hsa-let-7c-5p	MIMAT0000064	ATP8B4	79895	NM_024837
hsa-miR-145-5p	MIMAT0000437	ATP8B4	79895	NM_024837
hsa-miR-145-5p	MIMAT0000437	PYROXD1	79912	NM_024854
hsa-let-7c-5p	MIMAT0000064	MRM1	79922	NM_024864
hsa-miR-145-5p	MIMAT0000437	MAP6D1	79929	NM_024871
hsa-let-7c-5p	MIMAT0000064	DOK3	79930	XM_005265986
hsa-let-7c-5p	MIMAT0000064	SYNPO2L	79933	NM_001114133
hsa-miR-145-5p	MIMAT0000437	PHF17	79960	NM_024900
hsa-miR-145-5p	MIMAT0000437	DENND2D	79961	NM_024901
hsa-miR-145-5p	MIMAT0000437	TRMT2B	79979	NM_024917
hsa-miR-145-5p	MIMAT0000437	SVEP1	79987	NM_153366
hsa-miR-145-5p	MIMAT0000437	TTC26	79989	NM_001144920
hsa-miR-145-5p	MIMAT0000437	CSRNP3	80034	NM_001172173
hsa-miR-145-5p	MIMAT0000437	VCPIP1	80124	NM_025054
hsa-miR-145-5p	MIMAT0000437	SIKE1	80143	NM_001102396
hsa-let-7c-5p	MIMAT0000064	FRAS1	80144	NM_025074
hsa-miR-145-5p	MIMAT0000437	UXS1	80146	NM_025076
hsa-miR-145-5p	MIMAT0000437	MYCT1	80177	NM_025107
hsa-miR-145-5p	MIMAT0000437	C16orf59	80178	NM_025108
hsa-let-7c-5p	MIMAT0000064	OPA3	80207	NM_001017989
hsa-let-7c-5p	MIMAT0000064	CEP63	80254	NM_025180
hsa-let-7c-5p	MIMAT0000064	FAM214B	80256	XM_005251588
hsa-let-7c-5p	MIMAT0000064	EDEM3	80267	NM_025191
hsa-let-7c-5p	MIMAT0000064	TRABD	80305	XM_005261938
hsa-let-7c-5p	MIMAT0000064	MED28	80306	NM_025205
hsa-miR-145-5p	MIMAT0000437	KLHL15	80311	NM_030624
hsa-miR-145-5p	MIMAT0000437	LRRC27	80313	NM_001143757
hsa-miR-145-5p	MIMAT0000437	CPEB4	80315	NM_030627
hsa-let-7c-5p	MIMAT0000064	SLC19A3	80704	XM_005246871
hsa-miR-145-5p	MIMAT0000437	SLC19A3	80704	XM_005246871
hsa-let-7c-5p	MIMAT0000064	LIMD2	80774	NM_030576
hsa-miR-145-5p	MIMAT0000437	SH3BP5L	80851	NM_030645
hsa-miR-145-5p	MIMAT0000437	JHDM1D	80853	NM_030647
hsa-let-7c-5p	MIMAT0000064	ZBP1	81030	NM_001160419
hsa-let-7c-5p	MIMAT0000064	SYNC	81493	NM_030786
hsa-miR-145-5p	MIMAT0000437	FAM49A	81553	NM_030797
hsa-miR-145-5p	MIMAT0000437	CSRNP2	81566	NM_030809
hsa-miR-145-5p	MIMAT0000437	SNX27	81609	XM_005245511
hsa-miR-145-5p	MIMAT0000437	ACSBG2	81616	XM_005259652
hsa-miR-145-5p	MIMAT0000437	MAP1LC3B	81631	XM_005256184
hsa-let-7c-5p	MIMAT0000064	RNF170	81790	NM_001160223
hsa-miR-145-5p	MIMAT0000437	RNF170	81790	NM_001160223
hsa-let-7c-5p	MIMAT0000064	ADAMTS12	81792	XM_005248381
hsa-miR-145-5p	MIMAT0000437	NETO1	81832	NM_138966
hsa-miR-145-5p	MIMAT0000437	SBF2	81846	NM_030962
hsa-miR-145-5p	MIMAT0000437	SPRY4	81848	XM_005268517
hsa-miR-145-5p	MIMAT0000437	ADPGK	83440	NM_031284
hsa-miR-145-5p	MIMAT0000437	SLC25A31	83447	NM_031291
hsa-let-7c-5p	MIMAT0000064	PUS7L	83448	XM_005269166
hsa-miR-145-5p	MIMAT0000437	CDCA3	83461	XM_005253795
hsa-miR-145-5p	MIMAT0000437	APH1B	83464	NM_031301
hsa-miR-145-5p	MIMAT0000437	ARHGAP24	83478	NM_001025616
hsa-miR-145-5p	MIMAT0000437	MFRP	83552	NM_031433
hsa-let-7c-5p	MIMAT0000064	AMMECR1L	83607	XM_005263808
hsa-let-7c-5p	MIMAT0000064	C18orf21	83608	NM_001201475
hsa-let-7c-5p	MIMAT0000064	FAM103A1	83640	NM_031452
hsa-miR-145-5p	MIMAT0000437	TLN2	83660	XM_005254709
hsa-let-7c-5p	MIMAT0000064	PARP9	83666	NM_001146106
hsa-miR-145-5p	MIMAT0000437	CRISPLD2	83716	XM_005256190
hsa-let-7c-5p	MIMAT0000064	SLC25A18	83733	XM_005261288
hsa-let-7c-5p	MIMAT0000064	ATG10	83734	NM_031482
hsa-miR-145-5p	MIMAT0000437	ITCH	83737	NM_001257137
hsa-miR-145-5p	MIMAT0000437	RBM4B	83759	NM_031492
hsa-miR-145-5p	MIMAT0000437	SYT16	83851	XM_005268123
hsa-miR-145-5p	MIMAT0000437	FSD1L	83856	NM_207647
hsa-miR-145-5p	MIMAT0000437	GPR61	83873	XM_005271246
hsa-let-7c-5p	MIMAT0000064	STK40	83931	NM_032017
hsa-miR-145-5p	MIMAT0000437	EMILIN2	84034	NM_032048
hsa-let-7c-5p	MIMAT0000064	KATNAL1	84056	XM_005266574
hsa-let-7c-5p	MIMAT0000064	SLC10A7	84068	XM_005263276
hsa-miR-145-5p	MIMAT0000437	SLC10A7	84068	XM_005263276
hsa-let-7c-5p	MIMAT0000064	ZNF644	84146	XM_005271258
hsa-let-7c-5p	MIMAT0000064	ELMOD3	84173	XM_005264596
hsa-miR-145-5p	MIMAT0000437	FAR1	84188	NM_032228
hsa-miR-145-5p	MIMAT0000437	TMEM117	84216	XM_005269187
hsa-let-7c-5p	MIMAT0000064	RGPD5	84220	XM_005263819
hsa-miR-145-5p	MIMAT0000437	RGPD5	84220	XM_005263819
hsa-let-7c-5p	MIMAT0000064	ZCCHC9	84240	NM_032280
hsa-miR-145-5p	MIMAT0000437	CHCHD5	84269	NM_032309
hsa-miR-145-5p	MIMAT0000437	ING5	84289	NM_032329
hsa-miR-145-5p	MIMAT0000437	UTP23	84294	NM_032334
hsa-let-7c-5p	MIMAT0000064	DDI2	84301	NM_032341
hsa-miR-145-5p	MIMAT0000437	ELOF1	84337	XM_005260097
hsa-let-7c-5p	MIMAT0000064	RAB11FIP4	84440	NM_032932
hsa-miR-145-5p	MIMAT0000437	MEGF10	84466	XM_005272114
hsa-let-7c-5p	MIMAT0000064	PPAPDC1B	84513	NM_001102559
hsa-miR-145-5p	MIMAT0000437	KBTBD8	84541	NM_032505
hsa-miR-145-5p	MIMAT0000437	MAK16	84549	NM_032509
hsa-miR-145-5p	MIMAT0000437	LYZL1	84569	NM_032517
hsa-let-7c-5p	MIMAT0000064	DGAT2	84649	NM_032564
hsa-miR-145-5p	MIMAT0000437	CCDC62	84660	NM_201435
hsa-miR-145-5p	MIMAT0000437	FAM126A	84668	NM_032581
hsa-let-7c-5p	MIMAT0000064	ZNF347	84671	XM_005259335
hsa-let-7c-5p	MIMAT0000064	PLEKHA8	84725	NM_001197026
hsa-let-7c-5p	MIMAT0000064	CBX2	84733	NM_005189
hsa-let-7c-5p	MIMAT0000064	SFT2D3	84826	NM_032740
hsa-let-7c-5p	MIMAT0000064	LINGO1	84894	XM_005254725
hsa-let-7c-5p	MIMAT0000064	ZNF341	84905	NM_032819
hsa-let-7c-5p	MIMAT0000064	SLC35B4	84912	NM_032826
hsa-miR-145-5p	MIMAT0000437	SLC35B4	84912	NM_032826
hsa-let-7c-5p	MIMAT0000064	ZNF587	84914	NM_032828
hsa-let-7c-5p	MIMAT0000064	PPP1R15B	84919	NM_032833
hsa-let-7c-5p	MIMAT0000064	FAM104A	84923	XM_005257741
hsa-let-7c-5p	MIMAT0000064	ZNF566	84924	NM_001145345
hsa-let-7c-5p	MIMAT0000064	WDR73	84942	NM_032856
hsa-miR-145-5p	MIMAT0000437	SERAC1	84947	NM_032861
hsa-miR-145-5p	MIMAT0000437	PRPF38A	84950	NM_032864
hsa-miR-145-5p	MIMAT0000437	CGNL1	84952	NM_001252335
hsa-let-7c-5p	MIMAT0000064	MICALCL	84953	XM_005253178
hsa-let-7c-5p	MIMAT0000064	SMIM3	85027	NM_032947
hsa-let-7c-5p	MIMAT0000064	RHPN2	85415	NM_033103
hsa-miR-145-5p	MIMAT0000437	ZFHX2	85446	XM_005268134
hsa-let-7c-5p	MIMAT0000064	TSPYL5	85453	NM_033512
hsa-miR-145-5p	MIMAT0000437	FHDC1	85462	XM_005263319
hsa-miR-145-5p	MIMAT0000437	SSH2	85464	XM_005258058
hsa-miR-145-5p	MIMAT0000437	EPT1	85465	NM_033505
hsa-miR-145-5p	MIMAT0000437	GTPBP10	85865	NM_033107
hsa-miR-145-5p	MIMAT0000437	LMLN	89782	NM_001136049
hsa-miR-145-5p	MIMAT0000437	NAV3	89795	XM_005269214
hsa-let-7c-5p	MIMAT0000064	FCHSD1	89848	NM_033449
hsa-let-7c-5p	MIMAT0000064	KLHL6	89857	NM_130446
hsa-let-7c-5p	MIMAT0000064	TSPAN18	90139	XM_005253217
hsa-miR-145-5p	MIMAT0000437	HS6ST2	90161	NM_001077188
hsa-let-7c-5p	MIMAT0000064	ZNF835	90485	XM_005259382
hsa-let-7c-5p	MIMAT0000064	DHX57	90957	NM_198963
hsa-miR-145-5p	MIMAT0000437	CERS5	91012	NM_147190
hsa-miR-145-5p	MIMAT0000437	SLC25A46	91137	XM_005272126
hsa-let-7c-5p	MIMAT0000064	SESTD1	91404	NM_178123
hsa-miR-145-5p	MIMAT0000437	ACBD5	91452	NM_001271512
hsa-miR-145-5p	MIMAT0000437	PLXNA4	91584	NM_001105543
hsa-miR-145-5p	MIMAT0000437	YTHDC1	91746	NM_001031732
hsa-let-7c-5p	MIMAT0000064	RFT1	91869	NM_052859
hsa-miR-145-5p	MIMAT0000437	MYOZ3	91977	NM_001122853
hsa-miR-145-5p	MIMAT0000437	DSEL	92126	NM_032160
hsa-let-7c-5p	MIMAT0000064	MTDH	92140	NM_178812
hsa-let-7c-5p	MIMAT0000064	CDHR1	92211	NM_033100
hsa-miR-145-5p	MIMAT0000437	GORAB	92344	NM_152281
hsa-miR-145-5p	MIMAT0000437	SPSB4	92369	NM_080862
hsa-miR-145-5p	MIMAT0000437	ACPL2	92370	NM_001037172
hsa-miR-145-5p	MIMAT0000437	RBM18	92400	NM_033117
hsa-miR-145-5p	MIMAT0000437	SPECC1	92521	NM_152904
hsa-let-7c-5p	MIMAT0000064	B3GNT7	93010	NM_145236
hsa-let-7c-5p	MIMAT0000064	SDR42E1	93517	NM_145168
hsa-let-7c-5p	MIMAT0000064	TRMT10A	93587	NM_152292
hsa-miR-145-5p	MIMAT0000437	MRFAP1	93621	NM_033296
hsa-let-7c-5p	MIMAT0000064	FOXP2	93986	NM_148898
hsa-let-7c-5p	MIMAT0000064	H2AFV	94239	NM_138635
hsa-miR-145-5p	MIMAT0000437	CEP41	95681	NM_018718
hsa-let-7c-5p	MIMAT0000064	FNIP1	96459	NM_133372
hsa-let-7c-5p	MIMAT0000064	VPS26B	112936	NM_052875
hsa-let-7c-5p	MIMAT0000064	MED8	112950	NM_001001653
hsa-let-7c-5p	MIMAT0000064	TEX261	113419	NM_144582
hsa-let-7c-5p	MIMAT0000064	DTX2	113878	NM_020892
hsa-miR-145-5p	MIMAT0000437	SLC2A13	114134	XM_005268615
hsa-miR-145-5p	MIMAT0000437	PALM2	114299	NM_053016
hsa-miR-145-5p	MIMAT0000437	TIRAP	114609	NM_001039661
hsa-miR-145-5p	MIMAT0000437	FMNL2	114793	XM_005246263
hsa-miR-145-5p	MIMAT0000437	ELFN2	114794	NM_052906
hsa-miR-145-5p	MIMAT0000437	MYSM1	114803	XM_005270418
hsa-miR-145-5p	MIMAT0000437	RNF157	114804	NM_052916
hsa-let-7c-5p	MIMAT0000064	SLAMF6	114836	NM_001184714
hsa-miR-145-5p	MIMAT0000437	C1QTNF7	114905	NM_001135170
hsa-miR-145-5p	MIMAT0000437	VASN	114990	NM_138440
hsa-miR-145-5p	MIMAT0000437	SLC26A9	115019	NM_052934
hsa-miR-145-5p	MIMAT0000437	SLC26A7	115111	NM_052832
hsa-let-7c-5p	MIMAT0000064	UHRF2	115426	NM_152896
hsa-miR-145-5p	MIMAT0000437	ARL11	115761	NM_138450
hsa-let-7c-5p	MIMAT0000064	RMI2	116028	NM_152308
hsa-miR-145-5p	MIMAT0000437	DIRC1	116093	NM_052952
hsa-miR-145-5p	MIMAT0000437	FAM129A	116496	NM_052966
hsa-miR-145-5p	MIMAT0000437	WDR17	116966	NM_170710
hsa-miR-145-5p	MIMAT0000437	ARAP2	116984	XM_005262638
hsa-miR-145-5p	MIMAT0000437	RAB3IP	117177	NM_175623
hsa-miR-145-5p	MIMAT0000437	GPR62	118442	NM_080865
hsa-miR-145-5p	MIMAT0000437	MORN4	118812	NM_178832
hsa-miR-145-5p	MIMAT0000437	LYZL2	119180	NM_183058
hsa-let-7c-5p	MIMAT0000064	LRIG3	121227	NM_001136051
hsa-miR-145-5p	MIMAT0000437	BTBD11	121551	NM_001018072
hsa-let-7c-5p	MIMAT0000064	C14orf28	122525	NM_001017923
hsa-let-7c-5p	MIMAT0000064	SOCS4	122809	NM_199421
hsa-miR-145-5p	MIMAT0000437	SLC24A4	123041	NM_153648
hsa-let-7c-5p	MIMAT0000064	NIPA1	123606	NM_144599
hsa-let-7c-5p	MIMAT0000064	DCUN1D3	123879	XM_005255098
hsa-miR-145-5p	MIMAT0000437	DCUN1D3	123879	XM_005255098
hsa-miR-145-5p	MIMAT0000437	EARS2	124454	NM_001083614
hsa-miR-145-5p	MIMAT0000437	TMEM170A	124491	XM_005255795
hsa-miR-145-5p	MIMAT0000437	MSI2	124540	XM_005257014
hsa-let-7c-5p	MIMAT0000064	CANT1	124583	XM_005257020
hsa-miR-145-5p	MIMAT0000437	B4GALNT2	124872	NM_153446
hsa-let-7c-5p	MIMAT0000064	IRGQ	126298	NM_001007561
hsa-miR-145-5p	MIMAT0000437	IRGQ	126298	NM_001007561
hsa-let-7c-5p	MIMAT0000064	ZNF792	126375	XM_005258519
hsa-miR-145-5p	MIMAT0000437	UHMK1	127933	NM_175866
hsa-miR-145-5p	MIMAT0000437	KLF17	128209	NM_173484
hsa-miR-145-5p	MIMAT0000437	CMPK2	129607	NM_207315
hsa-let-7c-5p	MIMAT0000064	ACVR1C	130399	NM_001111031
hsa-miR-145-5p	MIMAT0000437	TMEM178A	130733	NM_152390
hsa-miR-145-5p	MIMAT0000437	M1AP	130951	NM_138804
hsa-let-7c-5p	MIMAT0000064	TRIM71	131405	NM_001039111
hsa-let-7c-5p	MIMAT0000064	CD200R1	131450	NM_138806
hsa-miR-145-5p	MIMAT0000437	TMEM42	131616	NM_144638
hsa-miR-145-5p	MIMAT0000437	GNPDA2	132789	XM_005248051
hsa-let-7c-5p	MIMAT0000064	CPEB2	132864	NM_001177382
hsa-let-7c-5p	MIMAT0000064	EMB	133418	NM_198449
hsa-miR-145-5p	MIMAT0000437	GRPEL2	134266	XM_005268374
hsa-let-7c-5p	MIMAT0000064	SOWAHA	134548	NM_175873
hsa-miR-145-5p	MIMAT0000437	SRSF12	135295	NM_080743
hsa-miR-145-5p	MIMAT0000437	KLF14	136259	NM_138693
hsa-let-7c-5p	MIMAT0000064	AGPAT6	137964	XM_005273402
hsa-miR-145-5p	MIMAT0000437	AGPAT6	137964	XM_005273402
hsa-miR-145-5p	MIMAT0000437	SLITRK4	139065	NM_001184749
hsa-let-7c-5p	MIMAT0000064	HDX	139324	NM_001177479
hsa-let-7c-5p	MIMAT0000064	GAB3	139716	NM_001081573
hsa-miR-145-5p	MIMAT0000437	GAB3	139716	NM_001081573
hsa-miR-145-5p	MIMAT0000437	ASB11	140456	NM_080873
hsa-miR-145-5p	MIMAT0000437	ZBTB46	140685	XM_005260197
hsa-let-7c-5p	MIMAT0000064	C20orf112	140688	XM_005260283
hsa-let-7c-5p	MIMAT0000064	ADAMTS14	140766	NM_139155
hsa-miR-145-5p	MIMAT0000437	TRPM6	140803	NM_017662
hsa-let-7c-5p	MIMAT0000064	ZNF280B	140883	NM_080764
hsa-miR-145-5p	MIMAT0000437	ITLN2	142683	NM_080878
hsa-miR-145-5p	MIMAT0000437	SAMD8	142891	NM_144660
hsa-miR-145-5p	MIMAT0000437	FGFBP3	143282	NM_152429
hsa-miR-145-5p	MIMAT0000437	XRRA1	143570	XM_005273768
hsa-miR-145-5p	MIMAT0000437	KRT80	144501	XM_005268675
hsa-miR-145-5p	MIMAT0000437	B3GALTL	145173	NM_194318
hsa-miR-145-5p	MIMAT0000437	PTGR2	145482	NM_001146155
hsa-miR-145-5p	MIMAT0000437	FAM81A	145773	XM_005254167
hsa-miR-145-5p	MIMAT0000437	ZFP90	146198	XM_005255804
hsa-let-7c-5p	MIMAT0000064	ENTHD2	146705	XM_005257066
hsa-miR-145-5p	MIMAT0000437	CBLN2	147381	NM_182511
hsa-let-7c-5p	MIMAT0000064	ZNF784	147808	NM_203374
hsa-let-7c-5p	MIMAT0000064	ZNF583	147949	NM_001159861
hsa-let-7c-5p	MIMAT0000064	ZNF555	148254	NM_152791
hsa-let-7c-5p	MIMAT0000064	MFSD4	148808	NM_181644
hsa-let-7c-5p	MIMAT0000064	SLC30A7	148867	NM_133496
hsa-miR-145-5p	MIMAT0000437	RC3H1	149041	NM_172071
hsa-miR-145-5p	MIMAT0000437	EXOC8	149371	NM_175876
hsa-miR-145-5p	MIMAT0000437	IGSF5	150084	NM_001080444
hsa-let-7c-5p	MIMAT0000064	TTL	150465	NM_153712
hsa-let-7c-5p	MIMAT0000064	TTC14	151613	NM_001042601
hsa-let-7c-5p	MIMAT0000064	DTX3L	151636	NM_138287
hsa-miR-145-5p	MIMAT0000437	SHISA3	152573	NM_001080505
hsa-miR-145-5p	MIMAT0000437	CREBRF	153222	NM_153607
hsa-let-7c-5p	MIMAT0000064	TMEM167A	153339	NM_174909
hsa-miR-145-5p	MIMAT0000437	TMEM167A	153339	NM_174909
hsa-miR-145-5p	MIMAT0000437	C7orf55	154791	NM_197964
hsa-let-7c-5p	MIMAT0000064	AMOT	154796	XM_005262087
hsa-miR-145-5p	MIMAT0000437	AMOTL1	154810	XM_005273798
hsa-miR-145-5p	MIMAT0000437	FREM1	158326	NM_144966
hsa-let-7c-5p	MIMAT0000064	KIAA1958	158405	XM_005251739
hsa-miR-145-5p	MIMAT0000437	KIAA1958	158405	XM_005251739
hsa-miR-145-5p	MIMAT0000437	AWAT2	158835	NM_001002254
hsa-let-7c-5p	MIMAT0000064	ALDH1L2	160428	NM_001034173
hsa-miR-145-5p	MIMAT0000437	DENND5B	160518	NM_144973
hsa-miR-145-5p	MIMAT0000437	ITPRIPL2	162073	NM_001034841
hsa-let-7c-5p	MIMAT0000064	FAM134C	162427	NM_178126
hsa-let-7c-5p	MIMAT0000064	TOR1AIP2	163590	NM_001199260
hsa-let-7c-5p	MIMAT0000064	IFNLR1	163702	NM_170743
hsa-let-7c-5p	MIMAT0000064	KANK4	163782	NM_181712
hsa-let-7c-5p	MIMAT0000064	CABP7	164633	NM_182527
hsa-miR-145-5p	MIMAT0000437	OXER1	165140	NM_148962
hsa-miR-145-5p	MIMAT0000437	KBTBD12	166348	XM_005247167
hsa-miR-145-5p	MIMAT0000437	MMAA	166785	NM_172250
hsa-miR-145-5p	MIMAT0000437	RASSF6	166824	NM_177532
hsa-miR-145-5p	MIMAT0000437	DCP2	167227	NM_152624
hsa-let-7c-5p	MIMAT0000064	CCDC71L	168455	NM_175884
hsa-miR-145-5p	MIMAT0000437	OLFML2A	169611	NM_182487
hsa-miR-145-5p	MIMAT0000437	GLIS3	169792	NM_001042413
hsa-let-7c-5p	MIMAT0000064	GIMAP1	170575	NM_130759
hsa-let-7c-5p	MIMAT0000064	ADAMTS15	170689	NM_139055
hsa-miR-145-5p	MIMAT0000437	CCER1	196477	NM_152638
hsa-miR-145-5p	MIMAT0000437	MLKL	197259	NM_152649
hsa-let-7c-5p	MIMAT0000064	NLRC3	197358	NM_178844
hsa-let-7c-5p	MIMAT0000064	SLC5A9	200010	XM_005270588
hsa-miR-145-5p	MIMAT0000437	CC2D1B	200014	NM_032449
hsa-let-7c-5p	MIMAT0000064	PLD5	200150	NM_152666
hsa-miR-145-5p	MIMAT0000437	SPAG17	200162	NM_206996
hsa-miR-145-5p	MIMAT0000437	TEX37	200523	XM_005264188
hsa-miR-145-5p	MIMAT0000437	APLF	200558	NM_173545
hsa-miR-145-5p	MIMAT0000437	PIKFYVE	200576	NM_015040
hsa-let-7c-5p	MIMAT0000064	LIPH	200879	NM_139248
hsa-miR-145-5p	MIMAT0000437	ARL13B	200894	NM_001174150
hsa-let-7c-5p	MIMAT0000064	FBXO45	200933	NM_001105573
hsa-miR-145-5p	MIMAT0000437	FBXO45	200933	NM_001105573
hsa-let-7c-5p	MIMAT0000064	KLHDC8B	200942	NM_173546
hsa-miR-145-5p	MIMAT0000437	TVP23C	201158	NM_001135036
hsa-let-7c-5p	MIMAT0000064	TRIM65	201292	NM_173547
hsa-miR-145-5p	MIMAT0000437	TRIM65	201292	NM_173547
hsa-let-7c-5p	MIMAT0000064	PDE12	201626	NM_177966
hsa-let-7c-5p	MIMAT0000064	TMEM192	201931	NM_001100389
hsa-miR-145-5p	MIMAT0000437	CCDC107	203260	NM_001195217
hsa-miR-145-5p	MIMAT0000437	VMA21	203547	NM_001017980
hsa-let-7c-5p	MIMAT0000064	AMER3	205147	NM_152698
hsa-let-7c-5p	MIMAT0000064	USP12	219333	NM_182488
hsa-miR-145-5p	MIMAT0000437	ENKUR	219670	NM_145010
hsa-let-7c-5p	MIMAT0000064	LRTOMT	220074	NM_001145309
hsa-miR-145-5p	MIMAT0000437	DOK6	220164	NM_152721
hsa-miR-145-5p	MIMAT0000437	HNRNPUL2	221092	NM_001079559
hsa-miR-145-5p	MIMAT0000437	C7orf41	222166	NM_152793
hsa-miR-145-5p	MIMAT0000437	ATXN7L1	222255	NM_138495
hsa-let-7c-5p	MIMAT0000064	PXT1	222659	NM_152990
hsa-miR-145-5p	MIMAT0000437	LHFPL5	222662	NM_182548
hsa-miR-145-5p	MIMAT0000437	SCUBE3	222663	XM_005248943
hsa-miR-145-5p	MIMAT0000437	CNOT6L	246175	NM_144571
hsa-let-7c-5p	MIMAT0000064	RICTOR	253260	XM_005248277
hsa-miR-145-5p	MIMAT0000437	IPMK	253430	NM_152230
hsa-miR-145-5p	MIMAT0000437	CADM2	253559	NM_001167674
hsa-let-7c-5p	MIMAT0000064	MMS22L	253714	XM_005266893
hsa-let-7c-5p	MIMAT0000064	UBN2	254048	XM_005250248
hsa-miR-145-5p	MIMAT0000437	UBN2	254048	NM_173569
hsa-miR-145-5p	MIMAT0000437	RNF169	254225	NM_001098638
hsa-miR-145-5p	MIMAT0000437	LCORL	254251	NM_153686
hsa-miR-145-5p	MIMAT0000437	MCM9	254394	NM_153255
hsa-miR-145-5p	MIMAT0000437	PROSER2	254427	NM_153256
hsa-miR-145-5p	MIMAT0000437	SLC41A1	254428	NM_173854
hsa-miR-145-5p	MIMAT0000437	REXO1L1	254958	XM_005251207
hsa-miR-145-5p	MIMAT0000437	RASGEF1C	255426	NM_175062
hsa-miR-145-5p	MIMAT0000437	COL6A5	256076	NM_001278298
hsa-miR-145-5p	MIMAT0000437	TMEM196	256130	NM_152774
hsa-let-7c-5p	MIMAT0000064	MFSD8	256471	NM_152778
hsa-miR-145-5p	MIMAT0000437	MFSD8	256471	NM_152778
hsa-miR-145-5p	MIMAT0000437	WDR72	256764	NM_182758
hsa-miR-145-5p	MIMAT0000437	SERINC5	256987	NM_001174072
hsa-miR-145-5p	MIMAT0000437	FRMD3	257019	NM_174938
hsa-miR-145-5p	MIMAT0000437	NEGR1	257194	NM_173808
hsa-miR-145-5p	MIMAT0000437	ALS2CL	259173	NM_001190707
hsa-miR-145-5p	MIMAT0000437	STEAP2	261729	NM_001244944
hsa-miR-145-5p	MIMAT0000437	RBM20	282996	NM_001134363
hsa-let-7c-5p	MIMAT0000064	PGM2L1	283209	NM_173582
hsa-let-7c-5p	MIMAT0000064	KCTD21	283219	XM_005273927
hsa-miR-145-5p	MIMAT0000437	CCDC88B	283234	NM_032251
hsa-let-7c-5p	MIMAT0000064	ANKRD52	283373	NM_173595
hsa-miR-145-5p	MIMAT0000437	ANKRD52	283373	NM_173595
hsa-miR-145-5p	MIMAT0000437	KSR2	283455	NM_173598
hsa-let-7c-5p	MIMAT0000064	GXYLT1	283464	NM_173601
hsa-miR-145-5p	MIMAT0000437	GXYLT1	283464	NM_173601
hsa-let-7c-5p	MIMAT0000064	PRTG	283659	NM_173814
hsa-miR-145-5p	MIMAT0000437	C17orf104	284071	NM_001145080
hsa-miR-145-5p	MIMAT0000437	ZADH2	284273	NM_175907
hsa-let-7c-5p	MIMAT0000064	C19orf54	284325	XM_005258776
hsa-miR-145-5p	MIMAT0000437	NWD1	284434	NM_001007525
hsa-miR-145-5p	MIMAT0000437	SYPL2	284612	NM_001040709
hsa-let-7c-5p	MIMAT0000064	CYB561D1	284613	NM_001134404
hsa-let-7c-5p	MIMAT0000064	EOGT	285203	XM_005264743
hsa-let-7c-5p	MIMAT0000064	C3orf38	285237	NM_173824
hsa-miR-145-5p	MIMAT0000437	RABL3	285282	NM_173825
hsa-let-7c-5p	MIMAT0000064	RPUSD3	285367	NM_173659
hsa-let-7c-5p	MIMAT0000064	DPH3	285381	NM_206831
hsa-let-7c-5p	MIMAT0000064	C5orf51	285636	NM_175921
hsa-miR-145-5p	MIMAT0000437	CNPY1	285888	NM_001103176
hsa-miR-145-5p	MIMAT0000437	TRIQK	286144	XM_005250893
hsa-let-7c-5p	MIMAT0000064	CRB2	286204	NM_173689
hsa-miR-145-5p	MIMAT0000437	P2RY8	286530	XM_005274429
hsa-miR-145-5p	MIMAT0000437	EIF4E3	317649	NM_001134649
hsa-let-7c-5p	MIMAT0000064	GPIHBP1	338328	NM_178172
hsa-miR-145-5p	MIMAT0000437	CPLX4	339302	NM_181654
hsa-miR-145-5p	MIMAT0000437	ZNF546	339327	NM_178544
hsa-miR-145-5p	MIMAT0000437	CCDC39	339829	NM_181426
hsa-miR-145-5p	MIMAT0000437	GADL1	339896	NM_207359
hsa-miR-145-5p	MIMAT0000437	MYLK4	340156	NM_001012418
hsa-let-7c-5p	MIMAT0000064	RSPO2	340419	NM_178565
hsa-miR-145-5p	MIMAT0000437	HEPHL1	341208	NM_001098672
hsa-let-7c-5p	MIMAT0000064	FREM2	341640	NM_207361
hsa-miR-145-5p	MIMAT0000437	KCNT2	343450	XM_005245133
hsa-miR-145-5p	MIMAT0000437	ARHGAP40	343578	NM_001164431
hsa-miR-145-5p	MIMAT0000437	PAQR9	344838	XM_005247427
hsa-miR-145-5p	MIMAT0000437	MTX3	345778	NM_001167741
hsa-miR-145-5p	MIMAT0000437	ZNF81	347344	NM_007137
hsa-miR-145-5p	MIMAT0000437	RBPMS2	348093	NM_194272
hsa-miR-145-5p	MIMAT0000437	GEN1	348654	XM_005262612
hsa-miR-145-5p	MIMAT0000437	RILPL1	353116	NM_178314
hsa-miR-145-5p	MIMAT0000437	NCR3LG1	374383	NM_001202439
hsa-miR-145-5p	MIMAT0000437	GJB7	375519	NM_198568
hsa-miR-145-5p	MIMAT0000437	NAT16	375607	NM_198571
hsa-let-7c-5p	MIMAT0000064	SOGA3	387104	NM_001012279
hsa-let-7c-5p	MIMAT0000064	LIPT2	387787	NM_001144869
hsa-let-7c-5p	MIMAT0000064	NHLRC3	387921	NM_001012754
hsa-let-7c-5p	MIMAT0000064	TMEM220	388335	NM_001004313
hsa-let-7c-5p	MIMAT0000064	RNF207	388591	NM_207396
hsa-miR-145-5p	MIMAT0000437	RNF207	388591	NM_207396
hsa-miR-145-5p	MIMAT0000437	LYSMD1	388695	NM_212551
hsa-let-7c-5p	MIMAT0000064	ZNF662	389114	NM_207404
hsa-let-7c-5p	MIMAT0000064	BEND4	389206	NM_207406
hsa-let-7c-5p	MIMAT0000064	LIN28B	389421	NM_001004317
hsa-miR-145-5p	MIMAT0000437	IYD	389434	NM_001164694
hsa-let-7c-5p	MIMAT0000064	GDF6	392255	NM_001001557
hsa-miR-145-5p	MIMAT0000437	FAM221B	392307	NM_001012446
hsa-miR-145-5p	MIMAT0000437	C13orf35	400165	NM_207440
hsa-miR-145-5p	MIMAT0000437	FAM174B	400451	NM_207446
hsa-let-7c-5p	MIMAT0000064	C17orf102	400591	NM_207454
hsa-miR-145-5p	MIMAT0000437	C17orf102	400591	NM_207454
hsa-miR-145-5p	MIMAT0000437	PAIP2B	400961	NM_020459
hsa-miR-145-5p	MIMAT0000437	AMTN	401138	NM_212557
hsa-let-7c-5p	MIMAT0000064	KLHL31	401265	NM_001003760
hsa-let-7c-5p	MIMAT0000064	SAMD12	401474	NM_001101676
hsa-miR-145-5p	MIMAT0000437	SAMD12	401474	NM_001101676
hsa-miR-145-5p	MIMAT0000437	C9orf170	401535	NM_001001709
hsa-miR-145-5p	MIMAT0000437	C9orf152	401546	NM_001012993
hsa-let-7c-5p	MIMAT0000064	SNX30	401548	NM_001012994
hsa-miR-145-5p	MIMAT0000437	SNX30	401548	NM_001012994
hsa-let-7c-5p	MIMAT0000064	FIGNL2	401720	NM_001013690
hsa-miR-145-5p	MIMAT0000437	C6orf201	404220	NM_001085401
hsa-let-7c-5p	MIMAT0000064	FNDC9	408263	NM_001001343
hsa-let-7c-5p	MIMAT0000064	MXRA7	439921	XM_005257382
hsa-let-7c-5p	MIMAT0000064	PLEKHG7	440107	XM_005268874
hsa-let-7c-5p	MIMAT0000064	GOLGA6L9	440295	XM_005254396
hsa-let-7c-5p	MIMAT0000064	TRIM67	440730	NM_001004342
hsa-miR-145-5p	MIMAT0000437	PTCHD4	442213	NM_207499
hsa-let-7c-5p	MIMAT0000064	RNF165	494470	XM_005258281
hsa-let-7c-5p	MIMAT0000064	C8orf58	541565	NM_001013842
hsa-miR-145-5p	MIMAT0000437	FAM229B	619208	NM_001033564
hsa-miR-145-5p	MIMAT0000437	ZNF704	619279	XM_005251279
hsa-let-7c-5p	MIMAT0000064	POTEM	641455	NM_001145442
hsa-miR-145-5p	MIMAT0000437	FAM110C	642273	NM_001077710
hsa-let-7c-5p	MIMAT0000064	TMPPE	643853	NM_001039770
hsa-miR-145-5p	MIMAT0000437	ANKRD33B	651746	NM_001164440
hsa-let-7c-5p	MIMAT0000064	RGPD8	727851	NM_001164463
hsa-let-7c-5p	MIMAT0000064	RGPD6	729540	NM_001123363
hsa-miR-145-5p	MIMAT0000437	RGPD6	729540	NM_001123363
hsa-miR-145-5p	MIMAT0000437	SHISA9	729993	NM_001145204
hsa-let-7c-5p	MIMAT0000064	DDTL	100037417	NM_001084393
hsa-let-7c-5p	MIMAT0000064	SIGLEC14	100049587	NM_001098612
hsa-let-7c-5p	MIMAT0000064	ZNF605	100289635	NM_183238
hsa-let-7c-5p	MIMAT0000064	ZNF783	100289678	NM_001195220
hsa-miR-145-5p	MIMAT0000437	SMIM18	100507341	NM_001206847
hsa-miR-145-5p	MIMAT0000437	SYNJ2BP-COX16	100529257	NM_001202548
hsa-miR-145-5p	MIMAT0000437	TVP23C-CDRT4	100533496	NM_001204478
hsa-let-7c-5p	MIMAT0000064	MYZAP	100820829	XM_005254112

## Sheet: Genes in common
miRNA	MIMATid	Gene	EntrezID	RefseqID
hsa-let-7c-5p	MIMAT0000064	ADRB3	155	NM_000025
hsa-miR-145-5p	MIMAT0000437	ADRB3	155	NM_000025
hsa-let-7c-5p	MIMAT0000064	AGPAT6	137964	XM_005273402
hsa-miR-145-5p	MIMAT0000437	AGPAT6	137964	XM_005273402
hsa-let-7c-5p	MIMAT0000064	ANKFY1	51479	NM_001257999
hsa-miR-145-5p	MIMAT0000437	ANKFY1	51479	NM_001257999
hsa-let-7c-5p	MIMAT0000064	ANKRD28	23243	NM_001195098
hsa-miR-145-5p	MIMAT0000437	ANKRD28	23243	NM_001195098
hsa-let-7c-5p	MIMAT0000064	ANKRD52	283373	NM_173595
hsa-miR-145-5p	MIMAT0000437	ANKRD52	283373	NM_173595
hsa-let-7c-5p	MIMAT0000064	ARHGAP26	23092	XM_005268398
hsa-miR-145-5p	MIMAT0000437	ARHGAP26	23092	XM_005268398
hsa-let-7c-5p	MIMAT0000064	ARHGAP28	79822	XM_005258144
hsa-miR-145-5p	MIMAT0000437	ARHGAP28	79822	XM_005258144
hsa-let-7c-5p	MIMAT0000064	ARHGEF38	54848	NM_001242729
hsa-miR-145-5p	MIMAT0000437	ARHGEF38	54848	NM_001242729
hsa-let-7c-5p	MIMAT0000064	ARNT2	9915	XM_005254811
hsa-miR-145-5p	MIMAT0000437	ARNT2	9915	NM_014862
hsa-let-7c-5p	MIMAT0000064	ATAD2B	54454	XM_005264372
hsa-miR-145-5p	MIMAT0000437	ATAD2B	54454	XM_005264372
hsa-let-7c-5p	MIMAT0000064	ATP8B4	79895	NM_024837
hsa-miR-145-5p	MIMAT0000437	ATP8B4	79895	NM_024837
hsa-let-7c-5p	MIMAT0000064	BACE2	25825	NM_012105
hsa-miR-145-5p	MIMAT0000437	BACE2	25825	NM_012105
hsa-let-7c-5p	MIMAT0000064	BCAT1	586	NM_005504
hsa-miR-145-5p	MIMAT0000437	BCAT1	586	NM_005504
hsa-let-7c-5p	MIMAT0000064	C17orf102	400591	NM_207454
hsa-miR-145-5p	MIMAT0000437	C17orf102	400591	NM_207454
hsa-let-7c-5p	MIMAT0000064	CBL	867	NM_005188
hsa-miR-145-5p	MIMAT0000437	CBL	867	NM_005188
hsa-let-7c-5p	MIMAT0000064	CCDC93	54520	NM_019044
hsa-miR-145-5p	MIMAT0000437	CCDC93	54520	NM_019044
hsa-let-7c-5p	MIMAT0000064	CDKAL1	54901	XM_005249201
hsa-miR-145-5p	MIMAT0000437	CDKAL1	54901	XM_005249201
hsa-let-7c-5p	MIMAT0000064	CHST3	9469	NM_004273
hsa-miR-145-5p	MIMAT0000437	CHST3	9469	NM_004273
hsa-let-7c-5p	MIMAT0000064	CLCN5	1184	NM_001127899
hsa-miR-145-5p	MIMAT0000437	CLCN5	1184	NM_001127899
hsa-let-7c-5p	MIMAT0000064	CREB3L2	64764	NM_194071
hsa-miR-145-5p	MIMAT0000437	CREB3L2	64764	NM_194071
hsa-let-7c-5p	MIMAT0000064	DAGLA	747	NM_006133
hsa-miR-145-5p	MIMAT0000437	DAGLA	747	NM_006133
hsa-let-7c-5p	MIMAT0000064	DCUN1D3	123879	XM_005255098
hsa-miR-145-5p	MIMAT0000437	DCUN1D3	123879	XM_005255098
hsa-let-7c-5p	MIMAT0000064	DTX4	23220	NM_015177
hsa-miR-145-5p	MIMAT0000437	DTX4	23220	NM_015177
hsa-let-7c-5p	MIMAT0000064	EEA1	8411	NM_003566
hsa-miR-145-5p	MIMAT0000437	EEA1	8411	NM_003566
hsa-let-7c-5p	MIMAT0000064	ELK4	2005	NM_001973
hsa-miR-145-5p	MIMAT0000437	ELK4	2005	NM_001973
hsa-let-7c-5p	MIMAT0000064	ELOVL4	6785	NM_022726
hsa-miR-145-5p	MIMAT0000437	ELOVL4	6785	NM_022726
hsa-let-7c-5p	MIMAT0000064	EYA3	2140	NM_001990
hsa-miR-145-5p	MIMAT0000437	EYA3	2140	NM_001990
hsa-let-7c-5p	MIMAT0000064	FAM178A	55719	NM_018121
hsa-miR-145-5p	MIMAT0000437	FAM178A	55719	NM_018121
hsa-let-7c-5p	MIMAT0000064	FBXO45	200933	NM_001105573
hsa-miR-145-5p	MIMAT0000437	FBXO45	200933	NM_001105573
hsa-let-7c-5p	MIMAT0000064	FNDC3A	22862	NM_001278438
hsa-miR-145-5p	MIMAT0000437	FNDC3A	22862	NM_001278438
hsa-let-7c-5p	MIMAT0000064	FZD3	7976	NM_017412
hsa-miR-145-5p	MIMAT0000437	FZD3	7976	NM_017412
hsa-let-7c-5p	MIMAT0000064	FZD4	8322	NM_012193
hsa-miR-145-5p	MIMAT0000437	FZD4	8322	NM_012193
hsa-let-7c-5p	MIMAT0000064	FZD5	7855	NM_003468
hsa-miR-145-5p	MIMAT0000437	FZD5	7855	NM_003468
hsa-let-7c-5p	MIMAT0000064	GAB3	139716	NM_001081573
hsa-miR-145-5p	MIMAT0000437	GAB3	139716	NM_001081573
hsa-let-7c-5p	MIMAT0000064	GXYLT1	283464	NM_173601
hsa-miR-145-5p	MIMAT0000437	GXYLT1	283464	NM_173601
hsa-let-7c-5p	MIMAT0000064	HELZ	9931	XM_005257888
hsa-miR-145-5p	MIMAT0000437	HELZ	9931	XM_005257888
hsa-let-7c-5p	MIMAT0000064	HIC2	23119	NM_015094
hsa-miR-145-5p	MIMAT0000437	HIC2	23119	XM_005261395
hsa-let-7c-5p	MIMAT0000064	HMBOX1	79618	XM_005273634
hsa-miR-145-5p	MIMAT0000437	HMBOX1	79618	XM_005273634
hsa-let-7c-5p	MIMAT0000064	HSPA14	51182	NM_001278205
hsa-miR-145-5p	MIMAT0000437	HSPA14	51182	NM_001278205
hsa-let-7c-5p	MIMAT0000064	IGF1	3479	NM_001111283
hsa-miR-145-5p	MIMAT0000437	IGF1	3479	NM_001111283
hsa-let-7c-5p	MIMAT0000064	IGF1R	3480	NM_000875
hsa-miR-145-5p	MIMAT0000437	IGF1R	3480	NM_000875
hsa-let-7c-5p	MIMAT0000064	IKBKAP	8518	NM_003640
hsa-miR-145-5p	MIMAT0000437	IKBKAP	8518	NM_003640
hsa-let-7c-5p	MIMAT0000064	IRGQ	126298	NM_001007561
hsa-miR-145-5p	MIMAT0000437	IRGQ	126298	NM_001007561
hsa-let-7c-5p	MIMAT0000064	KCNA6	3742	XM_005253686
hsa-miR-145-5p	MIMAT0000437	KCNA6	3742	XM_005253686
hsa-let-7c-5p	MIMAT0000064	KIAA0930	23313	NM_015264
hsa-miR-145-5p	MIMAT0000437	KIAA0930	23313	NM_015264
hsa-let-7c-5p	MIMAT0000064	KIAA1958	158405	XM_005251739
hsa-miR-145-5p	MIMAT0000437	KIAA1958	158405	XM_005251739
hsa-let-7c-5p	MIMAT0000064	KPNA4	3840	NM_002268
hsa-miR-145-5p	MIMAT0000437	KPNA4	3840	NM_002268
hsa-let-7c-5p	MIMAT0000064	LAMP2	3920	NM_002294
hsa-miR-145-5p	MIMAT0000437	LAMP2	3920	NM_002294
hsa-let-7c-5p	MIMAT0000064	LPGAT1	9926	XM_005273364
hsa-miR-145-5p	MIMAT0000437	LPGAT1	9926	XM_005273364
hsa-let-7c-5p	MIMAT0000064	MAPK4	5596	XM_005258299
hsa-miR-145-5p	MIMAT0000437	MAPK4	5596	XM_005258299
hsa-let-7c-5p	MIMAT0000064	MFSD8	256471	NM_152778
hsa-miR-145-5p	MIMAT0000437	MFSD8	256471	NM_152778
hsa-let-7c-5p	MIMAT0000064	MGAT4A	11320	NM_012214
hsa-miR-145-5p	MIMAT0000437	MGAT4A	11320	NM_012214
hsa-let-7c-5p	MIMAT0000064	MGLL	11343	NM_007283
hsa-miR-145-5p	MIMAT0000437	MGLL	11343	NM_007283
hsa-let-7c-5p	MIMAT0000064	MKLN1	4289	NM_001145354
hsa-miR-145-5p	MIMAT0000437	MKLN1	4289	NM_001145354
hsa-let-7c-5p	MIMAT0000064	NAP1L1	4673	NM_139207
hsa-miR-145-5p	MIMAT0000437	NAP1L1	4673	NM_004537
hsa-let-7c-5p	MIMAT0000064	NDUFA4	4697	NM_002489
hsa-miR-145-5p	MIMAT0000437	NDUFA4	4697	NM_002489
hsa-let-7c-5p	MIMAT0000064	NFIA	4774	NM_001134673
hsa-miR-145-5p	MIMAT0000437	NFIA	4774	NM_001134673
hsa-let-7c-5p	MIMAT0000064	NLN	57486	NM_020726
hsa-miR-145-5p	MIMAT0000437	NLN	57486	NM_020726
hsa-let-7c-5p	MIMAT0000064	ODF2L	57489	NM_001184766
hsa-miR-145-5p	MIMAT0000437	ODF2L	57489	NM_001007022
hsa-let-7c-5p	MIMAT0000064	ONECUT2	9480	NM_004852
hsa-miR-145-5p	MIMAT0000437	ONECUT2	9480	NM_004852
hsa-let-7c-5p	MIMAT0000064	P2RY2	5029	NM_176072
hsa-miR-145-5p	MIMAT0000437	P2RY2	5029	NM_176072
hsa-let-7c-5p	MIMAT0000064	PAPPA	5069	NM_002581
hsa-miR-145-5p	MIMAT0000437	PAPPA	5069	NM_002581
hsa-let-7c-5p	MIMAT0000064	PARP8	79668	NM_001178055
hsa-miR-145-5p	MIMAT0000437	PARP8	79668	NM_001178055
hsa-let-7c-5p	MIMAT0000064	PDPR	55066	NM_017990
hsa-miR-145-5p	MIMAT0000437	PDPR	55066	XM_005256016
hsa-let-7c-5p	MIMAT0000064	PIK3C2B	5287	XM_005245260
hsa-miR-145-5p	MIMAT0000437	PIK3C2B	5287	XM_005245260
hsa-let-7c-5p	MIMAT0000064	PLAGL2	5326	XM_005260436
hsa-miR-145-5p	MIMAT0000437	PLAGL2	5326	XM_005260436
hsa-let-7c-5p	MIMAT0000064	PLXNA2	5362	NM_025179
hsa-miR-145-5p	MIMAT0000437	PLXNA2	5362	NM_025179
hsa-let-7c-5p	MIMAT0000064	PRDM2	7799	NM_001007257
hsa-miR-145-5p	MIMAT0000437	PRDM2	7799	NM_012231
hsa-let-7c-5p	MIMAT0000064	PRLR	5618	NM_000949
hsa-miR-145-5p	MIMAT0000437	PRLR	5618	NM_001204314
hsa-let-7c-5p	MIMAT0000064	PVR	5817	NM_006505
hsa-miR-145-5p	MIMAT0000437	PVR	5817	NM_006505
hsa-let-7c-5p	MIMAT0000064	RAB18	22931	NM_001256410
hsa-miR-145-5p	MIMAT0000437	RAB18	22931	NM_001256410
hsa-let-7c-5p	MIMAT0000064	RAD18	56852	NM_020165
hsa-miR-145-5p	MIMAT0000437	RAD18	56852	NM_020165
hsa-let-7c-5p	MIMAT0000064	RANBP2	5903	XM_005264002
hsa-miR-145-5p	MIMAT0000437	RANBP2	5903	NM_006267
hsa-let-7c-5p	MIMAT0000064	RGPD5	84220	XM_005263819
hsa-miR-145-5p	MIMAT0000437	RGPD5	84220	XM_005263819
hsa-let-7c-5p	MIMAT0000064	RGPD6	729540	NM_001123363
hsa-miR-145-5p	MIMAT0000437	RGPD6	729540	NM_001123363
hsa-let-7c-5p	MIMAT0000064	RNF170	81790	NM_001160223
hsa-miR-145-5p	MIMAT0000437	RNF170	81790	NM_001160223
hsa-let-7c-5p	MIMAT0000064	RNF207	388591	NM_207396
hsa-miR-145-5p	MIMAT0000437	RNF207	388591	NM_207396
hsa-let-7c-5p	MIMAT0000064	RPS6KA3	6197	XM_005274574
hsa-miR-145-5p	MIMAT0000437	RPS6KA3	6197	XM_005274574
hsa-let-7c-5p	MIMAT0000064	RTKN	6242	NM_033046
hsa-miR-145-5p	MIMAT0000437	RTKN	6242	NM_033046
hsa-let-7c-5p	MIMAT0000064	SAMD12	401474	NM_001101676
hsa-miR-145-5p	MIMAT0000437	SAMD12	401474	NM_001101676
hsa-let-7c-5p	MIMAT0000064	SFMBT1	51460	XM_005265220
hsa-miR-145-5p	MIMAT0000437	SFMBT1	51460	XM_005265220
hsa-let-7c-5p	MIMAT0000064	SLC10A7	84068	XM_005263276
hsa-miR-145-5p	MIMAT0000437	SLC10A7	84068	XM_005263276
hsa-let-7c-5p	MIMAT0000064	SLC11A2	4891	NM_001174129
hsa-miR-145-5p	MIMAT0000437	SLC11A2	4891	NM_001174129
hsa-let-7c-5p	MIMAT0000064	SLC19A3	80704	XM_005246871
hsa-miR-145-5p	MIMAT0000437	SLC19A3	80704	XM_005246871
hsa-let-7c-5p	MIMAT0000064	SLC1A4	6509	NM_003038
hsa-miR-145-5p	MIMAT0000437	SLC1A4	6509	NM_003038
hsa-let-7c-5p	MIMAT0000064	SMAD2	4087	NM_001003652
hsa-miR-145-5p	MIMAT0000437	SMAD2	4087	NM_001003652
hsa-let-7c-5p	MIMAT0000064	SMARCA5	8467	NM_003601
hsa-miR-145-5p	MIMAT0000437	SMARCA5	8467	NM_003601
hsa-let-7c-5p	MIMAT0000064	SMC1A	8243	NM_001281463
hsa-miR-145-5p	MIMAT0000437	SMC1A	8243	NM_001281463
hsa-let-7c-5p	MIMAT0000064	SNX30	401548	NM_001012994
hsa-miR-145-5p	MIMAT0000437	SNX30	401548	NM_001012994
hsa-let-7c-5p	MIMAT0000064	SRGAP1	57522	XM_005269042
hsa-miR-145-5p	MIMAT0000437	SRGAP1	57522	NM_020762
hsa-let-7c-5p	MIMAT0000064	STS	412	XM_005274512
hsa-miR-145-5p	MIMAT0000437	STS	412	XM_005274512
hsa-let-7c-5p	MIMAT0000064	TBC1D12	23232	NM_015188
hsa-miR-145-5p	MIMAT0000437	TBC1D12	23232	NM_015188
hsa-let-7c-5p	MIMAT0000064	TFEC	22797	XM_005250231
hsa-miR-145-5p	MIMAT0000437	TFEC	22797	XM_005250231
hsa-let-7c-5p	MIMAT0000064	TGFBR1	7046	NM_004612
hsa-miR-145-5p	MIMAT0000437	TGFBR1	7046	NM_004612
hsa-let-7c-5p	MIMAT0000064	TMEM144	55314	NM_018342
hsa-miR-145-5p	MIMAT0000437	TMEM144	55314	NM_018342
hsa-let-7c-5p	MIMAT0000064	TMEM167A	153339	NM_174909
hsa-miR-145-5p	MIMAT0000437	TMEM167A	153339	NM_174909
hsa-let-7c-5p	MIMAT0000064	TMOD2	29767	NM_014548
hsa-miR-145-5p	MIMAT0000437	TMOD2	29767	NM_014548
hsa-let-7c-5p	MIMAT0000064	TNNI1	7135	NM_003281
hsa-miR-145-5p	MIMAT0000437	TNNI1	7135	NM_003281
hsa-let-7c-5p	MIMAT0000064	TRAPPC10	7109	NM_003274
hsa-miR-145-5p	MIMAT0000437	TRAPPC10	7109	NM_003274
hsa-let-7c-5p	MIMAT0000064	TRIM13	10206	NM_213590
hsa-miR-145-5p	MIMAT0000437	TRIM13	10206	NM_213590
hsa-let-7c-5p	MIMAT0000064	TRIM65	201292	NM_173547
hsa-miR-145-5p	MIMAT0000437	TRIM65	201292	NM_173547
hsa-let-7c-5p	MIMAT0000064	UBE2G2	7327	NM_182688
hsa-miR-145-5p	MIMAT0000437	UBE2G2	7327	NM_182688
hsa-let-7c-5p	MIMAT0000064	UBN2	254048	XM_005250248
hsa-miR-145-5p	MIMAT0000437	UBN2	254048	NM_173569
hsa-let-7c-5p	MIMAT0000064	WDR37	22884	XM_005252417
hsa-miR-145-5p	MIMAT0000437	WDR37	22884	XM_005252417
hsa-let-7c-5p	MIMAT0000064	XG	7499	XM_005274587
hsa-miR-145-5p	MIMAT0000437	XG	7499	XM_005274587
hsa-let-7c-5p	MIMAT0000064	ZBTB10	65986	NM_001105539
hsa-miR-145-5p	MIMAT0000437	ZBTB10	65986	NM_001105539
hsa-let-7c-5p	MIMAT0000064	ZFAND5	7763	NM_001102420
hsa-miR-145-5p	MIMAT0000437	ZFAND5	7763	NM_001102420
hsa-let-7c-5p	MIMAT0000064	ZFYVE26	23503	NM_015346
hsa-miR-145-5p	MIMAT0000437	ZFYVE26	23503	NM_015346
hsa-let-7c-5p	MIMAT0000064	ZNF197	10168	XM_005264783
hsa-miR-145-5p	MIMAT0000437	ZNF197	10168	XM_005264783
hsa-let-7c-5p	MIMAT0000064	ZNF24	7572	NM_006965
hsa-miR-145-5p	MIMAT0000437	ZNF24	7572	NM_006965
hsa-let-7c-5p	MIMAT0000064	ZNF28	7576	NM_006969
hsa-miR-145-5p	MIMAT0000437	ZNF28	7576	NM_006969
